# Supplementary material for: Association between antibiotics and adverse oncological outcomes in patients receiving targeted or immune-based therapy for hepatocellular carcinoma
Source: PubMed Central journal article supplement (PMC10183666; doi:10.1016/j.jhepr.2023.100747), 2023-03-30
Supplement: mmc1.pdf [file mmc1.pdf]

# Association between antibiotics and adverse oncological outcomes in patients receiving targeted or immune-based therapy for hepatocellular carcinoma

David J. Pinato, Xiaoxue Li, Pallavi Mishra-Kalyani, Antonio D'Alessio, Claudia A. M. Fulgenzi, Bernhard Scheiner, Matthias Pinter, Guo Wei, Julie Schneider, Donna R. Rivera, Richard Pazdur, Marc R. Theoret, Sandra Casak, Steven Lemery, 'Lola Fashoyin-Aje, Alessio Cortellini, Lorraine Pelosof

## Table of contents

### FIGURES

**Fig. S1.** **Page 3**  
Kaplan-Meier curves depicting the effect of antibiotic use on progression-free survival (Panels A, B) and overall survival (Panels C, D) before (A, C) and after (B, D) propensity score weighting.

### TABLES

**Table S1** **Page 6**  
Use of antibiotics within 30 days of initiation of study treatment

**Table S2** **Page 7**  
Baseline patient characteristics stratified by antibiotic exposure prior to and after inverse probability of treatment weighting (IPTW): Tyrosine kinase inhibitor group.

**Table S3** **Page 8**  
Baseline patient characteristics stratified by antibiotic exposure prior to and after inverse probability of treatment weighting (IPTW): immunotherapy group.

**Table S4****Page 9**

Baseline patient characteristics stratified by antibiotic exposure prior to and after inverse probability of treatment weighting (IPTW): placebo group.

**Table S5****Page 10**

The relationship between antibiotic use and efficacy outcomes in patients with unresectable/advanced HCC treated with immune checkpoint inhibitor (ICI) combinations or monotherapy.

**Table S6****Page 11**

Baseline patient characteristics stratified by antibiotic exposure prior to and after propensity score matching: Tyrosine kinase inhibitor group.

**Table S7****Page 12**

Baseline patient characteristics stratified by antibiotic exposure prior to and after propensity score matching: immunotherapy group.

**Table S8****Page 13**

Baseline patient characteristics stratified by antibiotic exposure prior to and after propensity score matching: placebo group.

**Table S9****Page 14**

The relationship between antibiotic use and efficacy outcomes in patients with unresectable/advanced HCC before and after propensity score matching.

**Table S10****Page 15**

The relationship between antibiotic use and efficacy outcomes in patients with unresectable/advanced HCC treated with immune checkpoint inhibitor (ICI) combinations or monotherapy before and after propensity score matching.

## Figures

**Fig. S1.** Kaplan-Meier curves depicting the effect of antibiotic use on PFS (Panels A, B) and OS (Panels C, D) before (A, C) and after (B, D) IPTW.

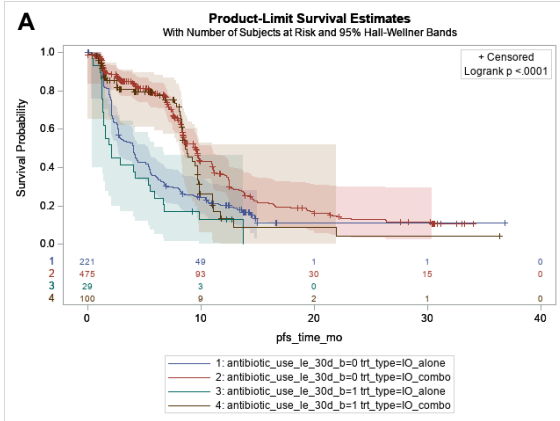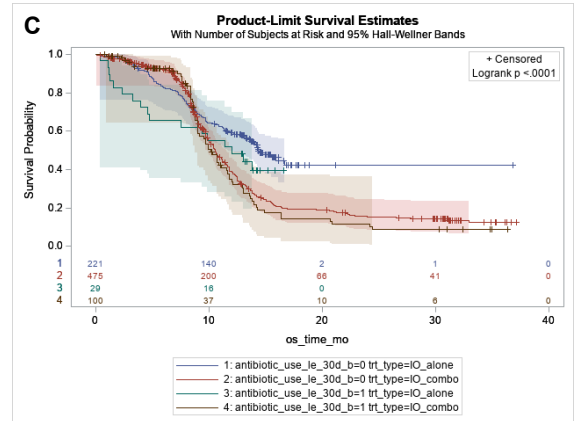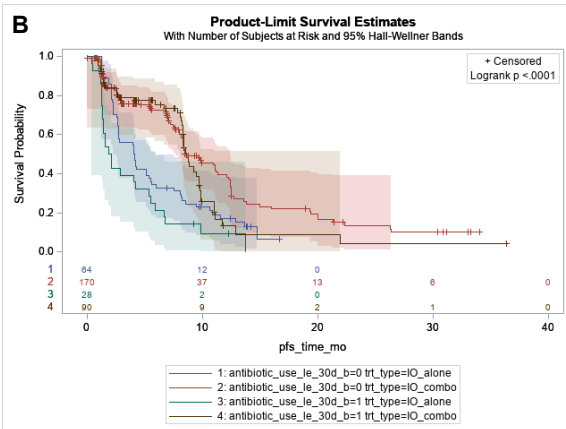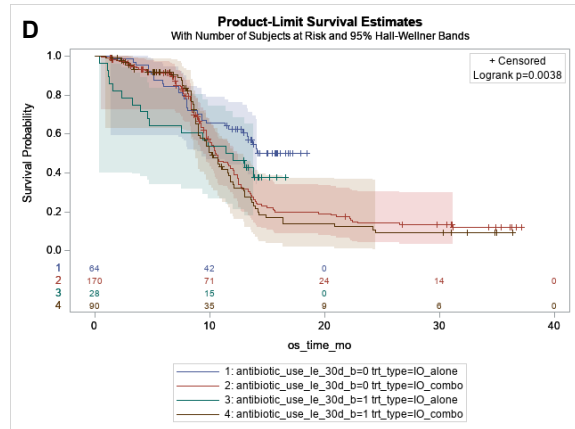

**TABLES****Table S1.** Use of antibiotics within 30 days of initiation of study treatment.

| <b>Antibiotic Use</b>      | <b>Placebo<br/>(n = 808)</b> | <b>Tyrosine<br/>kinase<br/>inhibitor<br/>(n = 1968)</b> | <b>Vascular<br/>Endothelial<br/>Growth<br/>Factor<br/>(VEGF)<br/>inhibitor (n<br/>= 480)</b> | <b>Immunotherapy<br/>(n = 842)</b> | <b>All patients<br/>(n = 4098)</b> |
|----------------------------|------------------------------|---------------------------------------------------------|----------------------------------------------------------------------------------------------|------------------------------------|------------------------------------|
| None or not within 30 days | 708 (88%)                    | 1656 (84%)                                              | 407 (85%)                                                                                    | 707 (84%)                          | 3478 (85%)                         |
| Used within 30 days        | 100 (12%)                    | 312 (16%)                                               | 73 (15%)                                                                                     | 135 (16%)                          | 620 (15%)                          |
| <b>Antibiotic Duration</b> |                              |                                                         |                                                                                              |                                    |                                    |
| ≤10 days of exposure       | 49 (49%)                     | 140 (45%)                                               | 41 (56%)                                                                                     | 51 (38%)                           | 281 (45%)                          |
| >10 days of exposure       | 51 (51%)                     | 172 (55%)                                               | 32 (44%)                                                                                     | 84 (62%)                           | 339 (55%)                          |

**Table S2.** Baseline patient characteristics stratified by antibiotic exposure prior to and after inverse probability of treatment weighting (IPTW): TKI group.

| Variable                      | No antibiotic use<br>N = 1640<br>Effect size = 1640 |       | Antibiotic use<br>N = 303<br>Effect size = 303 |       | Mean Squared Differences before Propensity Score Weighting | No antibiotic use<br>N = 1469<br>Effect size = 1746.74 |       | Antibiotic use<br>N = 278<br>Effect size = 1752.47 |       | Mean Squared Differences before Propensity Score Weighting |
|-------------------------------|-----------------------------------------------------|-------|------------------------------------------------|-------|------------------------------------------------------------|--------------------------------------------------------|-------|----------------------------------------------------|-------|------------------------------------------------------------|
|                               | Mean/N                                              | STD/% | Mean/N                                         | STD/% |                                                            | Mean/N                                                 | STD/% | Mean/N                                             | STD/% |                                                            |
| <b>Age</b>                    |                                                     |       |                                                |       |                                                            |                                                        |       |                                                    |       |                                                            |
| Mean/SD                       | 61.96                                               | 11.67 | 62.38                                          | 11.70 | 0.035                                                      | 61.87                                                  | 12.53 | 61.91                                              | 29.09 | 0.002                                                      |
| Median/Range                  | 63                                                  | 19-88 | 63                                             | 27-88 |                                                            | 63                                                     | 19-88 | 62                                                 | 27-88 |                                                            |
| <b>Race</b>                   |                                                     |       |                                                |       |                                                            |                                                        |       |                                                    |       |                                                            |
| Asian                         | 899                                                 | 54.8  | 166                                            | 54.8  | -0.001                                                     | 977                                                    | 55.9  | 975                                                | 55.6  | -0.006                                                     |
| Other/Not reported            | 131                                                 | 8.0   | 33                                             | 10.9  | 0.10                                                       | 162                                                    | 9.3   | 156                                                | 8.9   | -0.01                                                      |
| White                         | 610                                                 | 37.2  | 104                                            | 34.3  | -0.06                                                      | 607                                                    | 34.8  | 622                                                | 35.5  | 0.01                                                       |
| <b>Sex</b>                    |                                                     |       |                                                |       |                                                            |                                                        |       |                                                    |       |                                                            |
| Female                        | 247                                                 | 15.1  | 64                                             | 21.1  | 0.16                                                       | 274                                                    | 15.7  | 273                                                | 15.6  | -0.003                                                     |
| Male                          | 1393                                                | 84.9  | 239                                            | 78.9  | -0.16                                                      | 1473                                                   | 84.3  | 1480                                               | 84.4  | 0.003                                                      |
| <b>Region</b>                 |                                                     |       |                                                |       |                                                            |                                                        |       |                                                    |       |                                                            |
| Asia                          | 836                                                 | 51.0  | 153                                            | 50.5  | -0.01                                                      | 903                                                    | 51.7  | 905                                                | 51.7  | -0.001                                                     |
| Rest of world                 | 804                                                 | 49.0  | 150                                            | 49.5  | 0.01                                                       | 844                                                    | 48.3  | 847                                                | 48.3  | 0.001                                                      |
| <b>ECOG PS</b>                |                                                     |       |                                                |       |                                                            |                                                        |       |                                                    |       |                                                            |
| 0                             | 1010                                                | 61.6  | 178                                            | 58.7  | -0.06                                                      | 1079                                                   | 61.8  | 1110                                               | 63.3  | 0.03                                                       |
| 1                             | 630                                                 | 38.4  | 125                                            | 41.3  | 0.06                                                       | 667                                                    | 38.2  | 642                                                | 36.7  | -0.03                                                      |
| <b>Etiology</b>               |                                                     |       |                                                |       |                                                            |                                                        |       |                                                    |       |                                                            |
| Non-viral                     | 353                                                 | 21.5  | 68                                             | 22.4  | 0.02                                                       | 420                                                    | 24.0  | 427                                                | 24.3  | 0.01                                                       |
| Viral                         | 1118                                                | 68.2  | 210                                            | 69.3  | 0.02                                                       | 1327                                                   | 76.0  | 1326                                               | 75.7  | -0.01                                                      |
| <b>Prior Systemic Therapy</b> |                                                     |       |                                                |       |                                                            |                                                        |       |                                                    |       |                                                            |
| Yes                           | 957                                                 | 58.4  | 154                                            | 50.8  | -0.15                                                      | 917                                                    | 52.5  | 924                                                | 52.7  | 0.004                                                      |
| No                            | 683                                                 | 41.7  | 149                                            | 49.2  | 0.15                                                       | 830                                                    | 47.5  | 828                                                | 47.3  | -0.004                                                     |
| <b>Macrovascular</b>          |                                                     |       |                                                |       |                                                            |                                                        |       |                                                    |       |                                                            |
| Absence                       | 1224                                                | 74.6  | 218                                            | 71.9  | -0.06                                                      | 1289                                                   | 73.8  | 1298                                               | 74.1  | 0.006                                                      |
| Presence                      | 414                                                 | 25.2  | 85                                             | 28.1  | 0.06                                                       | 458                                                    | 26.2  | 455                                                | 25.9  | -0.006                                                     |
| <b>Extrahepatic</b>           |                                                     |       |                                                |       |                                                            |                                                        |       |                                                    |       |                                                            |
| Absence                       | 572                                                 | 34.9  | 88                                             | 29.0  | -0.13                                                      | 597                                                    | 34.2  | 606                                                | 34.6  | 0.01                                                       |
| Presence                      | 1068                                                | 65.1  | 215                                            | 71.0  | 0.13                                                       | 1150                                                   | 65.8  | 1147                                               | 65.4  | -0.01                                                      |

**Table S3.** Baseline patient characteristics stratified by antibiotic exposure prior to and after inverse probability of treatment weighting (IPTW): immunotherapy group.

| Variable                      | No antibiotic use<br>N = 696<br>Effect size = 696 |       | Antibiotic use<br>N = 129<br>Effect size = 129 |       | Mean Squared Differences before Propensity Score Weighting | No antibiotic use<br>N = 660<br>Effect size = 779.56 |       | Antibiotic use<br>N = 120<br>Effect size = 788.67 |       | Mean Squared Differences before Propensity Score Weighting |
|-------------------------------|---------------------------------------------------|-------|------------------------------------------------|-------|------------------------------------------------------------|------------------------------------------------------|-------|---------------------------------------------------|-------|------------------------------------------------------------|
|                               | Mean/N                                            | STD/% | Mean/N                                         | STD/% |                                                            | Mean/N                                               | STD/% | Mean/N                                            | STD/% |                                                            |
| <b>Age</b>                    |                                                   |       |                                                |       |                                                            |                                                      |       |                                                   |       |                                                            |
| Mean/SD                       | 62.75                                             | 11.51 | 63.39                                          | 11.80 | 0.05                                                       | 63.49                                                | 11.70 | 62.99                                             | 11.76 | -0.04                                                      |
| Median/Range                  | 64                                                | 18-88 | 64                                             | 34-88 |                                                            | 64                                                   | 18-88 | 64                                                | 34-88 |                                                            |
| <b>Race</b>                   |                                                   |       |                                                |       |                                                            |                                                      |       |                                                   |       |                                                            |
| Asian                         | 337                                               | 48.4  | 65                                             | 50.4  | 0.04                                                       | 397                                                  | 50.9  | 408                                               | 51.8  | 0.02                                                       |
| Other/Not reported            | 35                                                | 5.0   | 11                                             | 8.5   | 0.14                                                       | 45                                                   | 5.7   | 42                                                | 5.3   | -0.02                                                      |
| White                         | 312                                               | 44.8  | 51                                             | 39.5  | -0.11                                                      | 338                                                  | 43.3  | 338                                               | 42.9  | -0.01                                                      |
| <b>Sex</b>                    |                                                   |       |                                                |       |                                                            |                                                      |       |                                                   |       |                                                            |
| Female                        | 129                                               | 18.5  | 28                                             | 21.7  | 0.08                                                       | 145                                                  | 18.5  | 148                                               | 18.8  | 0.005                                                      |
| Male                          | 567                                               | 81.5  | 101                                            | 78.3  | -0.08                                                      | 635                                                  | 81.5  | 641                                               | 81.2  | -0.005                                                     |
| <b>Region</b>                 |                                                   |       |                                                |       |                                                            |                                                      |       |                                                   |       |                                                            |
| Asia                          | 307                                               | 44.1  | 53                                             | 41.1  | -0.06                                                      | 356                                                  | 45.7  | 368                                               | 46.6  | 0.02                                                       |
| Rest of world                 | 388                                               | 55.7  | 76                                             | 58.9  | 0.06                                                       | 423                                                  | 54.3  | 421                                               | 53.4  | -0.02                                                      |
| <b>ECOG PS</b>                |                                                   |       |                                                |       |                                                            |                                                      |       |                                                   |       |                                                            |
| 0                             | 434                                               | 62.4  | 72                                             | 55.8  | -0.13                                                      | 473                                                  | 60.6  | 472                                               | 59.9  | -0.015                                                     |
| 1                             | 262                                               | 37.6  | 57                                             | 44.2  | 0.13                                                       | 307                                                  | 39.4  | 316                                               | 40.1  | 0.015                                                      |
| <b>Etiology</b>               |                                                   |       |                                                |       |                                                            |                                                      |       |                                                   |       |                                                            |
| Non-viral                     | 222                                               | 31.9  | 49                                             | 38.0  | 0.13                                                       | 255                                                  | 32.7  | 252                                               | 32.0  | -0.01                                                      |
| Viral                         | 458                                               | 65.8  | 74                                             | 57.4  | -0.17                                                      | 525                                                  | 67.3  | 537                                               | 68.0  | 0.01                                                       |
| <b>Prior Systemic Therapy</b> |                                                   |       |                                                |       |                                                            |                                                      |       |                                                   |       |                                                            |
| No                            | 355                                               | 51.0  | 76                                             | 58.9  | 0.16                                                       | 395                                                  | 50.7  | 390                                               | 49.4  | -0.03                                                      |
| Yes                           | 341                                               | 49.0  | 53                                             | 41.1  | -0.16                                                      | 384                                                  | 49.3  | 399                                               | 50.6  | 0.03                                                       |
| <b>Immunotherapy</b>          |                                                   |       |                                                |       |                                                            |                                                      |       |                                                   |       |                                                            |
| Monotherapy                   | 221                                               | 31.8  | 29                                             | 22.5  | -0.21                                                      | 240                                                  | 30.9  | 263                                               | 33.3  | 0.05                                                       |
| Combination                   | 475                                               | 68.2  | 100                                            | 77.5  | 0.21                                                       | 539                                                  | 69.1  | 526                                               | 66.7  | -0.05                                                      |
| <b>Macrovascular</b>          |                                                   |       |                                                |       |                                                            |                                                      |       |                                                   |       |                                                            |
| Absence                       | 478                                               | 68.7  | 90                                             | 69.8  | 0.02                                                       | 533                                                  | 68.3  | 552                                               | 69.9  | 0.03                                                       |
| Presence                      | 218                                               | 31.3  | 38                                             | 29.5  | -0.04                                                      | 247                                                  | 31.7  | 237                                               | 30.1  | -0.03                                                      |
| <b>Extrahepatic</b>           |                                                   |       |                                                |       |                                                            |                                                      |       |                                                   |       |                                                            |
| Absence                       | 236                                               | 33.9  | 38                                             | 29.5  | -0.10                                                      | 249                                                  | 31.9  | 276                                               | 35.0  | 0.07                                                       |
| Presence                      | 460                                               | 66.1  | 91                                             | 70.5  | 0.10                                                       | 531                                                  | 68.1  | 513                                               | 65.0  | -0.07                                                      |

**Table S4.** Baseline patient characteristics stratified by antibiotic exposure prior to and after inverse probability of treatment weighting (IPTW): placebo group.

| Variable                      | No antibiotic use<br>N = 697<br>Effect size = 697 |       | Antibiotic use<br>N = 97<br>Effect size = 97 |       | Mean Squared Differences before Propensity Score Weighting | No antibiotic use<br>N = 675<br>Effect size = 766.69 |       | Antibiotic use<br>N = 92<br>Effect size = 722.45 |       | Mean Squared Differences before Propensity Score Weighting |
|-------------------------------|---------------------------------------------------|-------|----------------------------------------------|-------|------------------------------------------------------------|------------------------------------------------------|-------|--------------------------------------------------|-------|------------------------------------------------------------|
|                               | Mean/N                                            | STD/% | Mean/N                                       | STD/% |                                                            | Mean/N                                               | STD/% | Mean/N                                           | STD/% |                                                            |
| <b>Age</b>                    |                                                   |       |                                              |       |                                                            |                                                      |       |                                                  |       |                                                            |
| Mean/STD                      | 62.50                                             | 11.09 | 62.55                                        | 12.11 | 0.004                                                      | 62.26                                                | 11.61 | 62.01                                            | 11.62 | -0.02                                                      |
| Median/Range                  | 63                                                | 23-86 | 63                                           | 24-85 |                                                            | 63                                                   | 23-86 | 63                                               | 24-85 |                                                            |
| <b>Race</b>                   |                                                   |       |                                              |       |                                                            |                                                      |       |                                                  |       |                                                            |
| Asian                         | 300                                               | 43.0  | 38                                           | 39.2  | -0.08                                                      | 335                                                  | 43.7  | 339                                              | 43.9  | 0.005                                                      |
| Other/Not reported            | 69                                                | 9.9   | 9                                            | 9.3   | -0.02                                                      | 78                                                   | 10.2  | 85                                               | 11.0  | 0.03                                                       |
| White                         | 315                                               | 45.2  | 46                                           | 47.4  | 0.04                                                       | 354                                                  | 46.1  | 348                                              | 45.1  | -0.02                                                      |
| <b>Sex</b>                    |                                                   |       |                                              |       |                                                            |                                                      |       |                                                  |       |                                                            |
| Female                        | 89                                                | 12.8  | 24                                           | 24.7  | 0.31                                                       | 106                                                  | 13.8  | 104                                              | 13.4  | -0.01                                                      |
| Male                          | 608                                               | 87.2  | 73                                           | 75.3  | -0.31                                                      | 661                                                  | 86.2  | 669                                              | 86.6  | 0.01                                                       |
| <b>Region</b>                 |                                                   |       |                                              |       |                                                            |                                                      |       |                                                  |       |                                                            |
| Asia                          | 432                                               | 62.0  | 61                                           | 62.9  | -0.02                                                      | 298                                                  | 38.9  | 309                                              | 40.0  | 0.02                                                       |
| Rest of world                 | 418                                               | 60.0  | 45                                           | 46.4  | 0.02                                                       | 469                                                  | 61.1  | 463                                              | 60.0  | -0.02                                                      |
| <b>ECOG PS</b>                |                                                   |       |                                              |       |                                                            |                                                      |       |                                                  |       |                                                            |
| 0                             | 279                                               | 40.0  | 52                                           | 53.6  | -0.27                                                      | 452                                                  | 59.0  | 458                                              | 59.2  | 0.01                                                       |
| 1                             | 10                                                | 1.4   | 1                                            | 1.0   | 0.27                                                       | 314                                                  | 41.0  | 315                                              | 40.8  | -0.01                                                      |
| <b>Etiology</b>               |                                                   |       |                                              |       |                                                            |                                                      |       |                                                  |       |                                                            |
| Non-viral                     | 264                                               | 37.9  | 30                                           | 30.9  | -0.15                                                      | 286                                                  | 37.3  | 304                                              | 39.3  | 0.04                                                       |
| Viral                         | 423                                               | 60.7  | 66                                           | 68.0  | 0.15                                                       | 480                                                  | 62.7  | 469                                              | 60.7  | -0.04                                                      |
| <b>Prior Systemic Therapy</b> |                                                   |       |                                              |       |                                                            |                                                      |       |                                                  |       |                                                            |
| No                            | 0                                                 | -     | 0                                            | -     | -                                                          | 0                                                    | -     | 0                                                | -     | -                                                          |
| Yes                           | 697                                               | -     | 97                                           | -     | -                                                          | 766.69                                               | -     | 772.45                                           | -     | -                                                          |
| <b>Macrovascular</b>          |                                                   |       |                                              |       |                                                            |                                                      |       |                                                  |       |                                                            |
| Absence                       | 489                                               | 70.2  | 62                                           | 63.9  | -0.13                                                      | 536                                                  | 69.9  | 550                                              | 71.3  | 0.03                                                       |
| Presence                      | 208                                               | 29.8  | 35                                           | 36.1  | 0.13                                                       | 231                                                  | 30.1  | 222                                              | 28.7  | -0.03                                                      |
| <b>Extrahepatic</b>           |                                                   |       |                                              |       |                                                            |                                                      |       |                                                  |       |                                                            |
| Absence                       | 197                                               | 28.3  | 26                                           | 26.8  | -0.03                                                      | 214                                                  | 27.9  | 208                                              | 26.9  | -0.02                                                      |
| Presence                      | 500                                               | 71.7  | 71                                           | 73.2  | 0.03                                                       | 553                                                  | 72.1  | 565                                              | 73.1  | 0.02                                                       |

**Table S5.** The relationship between antibiotic use and efficacy outcomes in patients with unresectable/advanced HCC treated with immune checkpoint inhibitor (ICI) combinations or monotherapy.

|                                                 | Unadjusted Analyses |                  | Adjusted using IPTW * |                 |
|-------------------------------------------------|---------------------|------------------|-----------------------|-----------------|
|                                                 | No Antibiotic Use   | Antibiotic Use   | No Antibiotic Use     | Antibiotic Use  |
| <b>Immune checkpoint inhibitor combinations</b> |                     |                  |                       |                 |
| Sample size                                     |                     |                  |                       |                 |
| # patients                                      | 475                 | 100              | 448                   | 92              |
| Effect size                                     | 475                 | 100              | 539.76                | 542.65          |
| <b>Progression-free survival (PFS)</b>          |                     |                  |                       |                 |
| Median (95% CI), mo                             | 9.6 (8.5, 9.8)      | 8.6 (8.3, 9.7)   | 9.7 (8.5, 11.0)       | 8.6 (8.3, 9.7)  |
| HR** (95% CI)                                   | 1.33 (0.97, 1.81)   |                  | 1.50 (1.26, 1.77)     |                 |
| <b>Overall survival (OS)</b>                    |                     |                  |                       |                 |
| Median (95% CI), mo                             | 10.5 (10.0, 11.2)   | 10.2 (9.0, 11.6) | 10.6 (10.2, 11.4)     | 9.9 (9.0, 11.6) |
| HR** (95% CI)                                   | 1.13 (0.87, 1.47)   |                  | 1.14 (0.99, 1.32)     |                 |
| <b>Immune checkpoint inhibitor monotherapy</b>  |                     |                  |                       |                 |
| Sample size                                     |                     |                  |                       |                 |
| # patients                                      | 221                 | 29               | 212                   | 28              |
| Effect Size                                     | 221                 | 29               | 240.20                | 228.58          |
| <b>Progression-free survival (PFS)</b>          |                     |                  |                       |                 |
| Median (95% CI), mo                             | 4.0 (2.8, 4.4)      | 2.1 (1.3, 5.4)   | 4.0 (2.8, 4.4)        | 2.1 (1.3, 5.4)  |
| HR (95% CI)                                     | 1.51 (1.00, 2.28)   |                  | 1.49 (1.22, 1.80)     |                 |
| <b>Overall survival (OS)</b>                    |                     |                  |                       |                 |
| Median (95% CI), mo                             | 14.3 (13.2, NE)     | 12.0 (4.6, NE)   | 14.4 (13.2, NE)       | 13.0 (4.6, NE)  |
| HR (95% CI)                                     | 1.47 (0.88, 2.45)   |                  | 1.31 (1.02, 1.68)     |                 |

\* The weights were derived from a propensity score (IPTW) models which included the following baseline variables as covariates: age, race, gender, region, European Collaborative Oncology Group (ECOG) performance status, etiology of chronic liver disease, presence of macrovascular invasion, presence of extrahepatic disease and receipt of prior lines of treatment.

\*\* HR is stratified by immune checkpoint inhibitor alone or immune checkpoint inhibitor combination.



**Table S6.** Baseline patient characteristics stratified by antibiotic exposure prior to and after propensity score matching: Tyrosine kinase inhibitor (TKI) group.

| Variable             | No antibiotic use<br>N = 1640 |       | Antibiotic use<br>N = 303 |       | Mean Squared Differences before matching | No antibiotic use<br>N = 548 |       | Antibiotic use<br>N = 276 |       | Mean Squared Differences after matching |
|----------------------|-------------------------------|-------|---------------------------|-------|------------------------------------------|------------------------------|-------|---------------------------|-------|-----------------------------------------|
|                      | Mean/N                        | STD/% | Mean/N                    | STD/% |                                          | Mean/N                       | STD/% | Mean/N                    | STD/% |                                         |
| <b>Age</b>           | 61.96                         | 11.67 | 62.38                     | 11.70 | 0.035                                    | 62.26                        | 11.61 | 62.01                     | 11.62 | -0.021                                  |
| <b>Race</b>          |                               |       |                           |       |                                          |                              |       |                           |       |                                         |
| Asian                | 899                           | 54.8  | 166                       | 54.8  | -0.001                                   | 296                          | 54.0  | 149                       | 54.0  | -0.001                                  |
| Other/Not reported   | 131                           | 8.0   | 33                        | 10.9  | 0.10                                     | 64                           | 11.7  | 33                        | 12.0  | 0.01                                    |
| White                | 610                           | 37.2  | 104                       | 34.3  | -0.06                                    | 188                          | 34.3  | 94                        | 34.1  | -0.01                                   |
| <b>Sex</b>           |                               |       |                           |       |                                          |                              |       |                           |       |                                         |
| Female               | 247                           | 15.1  | 64                        | 21.1  | 0.16                                     | 107                          | 19.5  | 57                        | 20.7  | 0.03                                    |
| Male                 | 1393                          | 84.9  | 239                       | 78.9  | -0.16                                    | 441                          | 80.5  | 219                       | 79.3  | -0.03                                   |
| <b>Region</b>        |                               |       |                           |       |                                          |                              |       |                           |       |                                         |
| Asia                 | 836                           | 51.0  | 153                       | 50.5  | -0.01                                    | 271                          | 49.5  | 138                       | 50.0  | 0.01                                    |
| Rest of world        | 804                           | 49.0  | 150                       | 49.5  | 0.01                                     | 277                          | 50.5  | 138                       | 50.0  | -0.01                                   |
| <b>ECOG</b>          |                               |       |                           |       |                                          |                              |       |                           |       |                                         |
| 0                    | 1010                          | 61.6  | 178                       | 58.7  | -0.06                                    | 325                          | 59.3  | 161                       | 58.3  | -0.02                                   |
| 1                    | 630                           | 38.4  | 125                       | 41.3  | 0.06                                     | 223                          | 40.7  | 115                       | 41.7  | 0.02                                    |
| <b>Etiology</b>      |                               |       |                           |       |                                          |                              |       |                           |       |                                         |
| Non-viral            | 353                           | 21.5  | 68                        | 22.4  | 0.02                                     | 135                          | 24.6  | 68                        | 24.6  | 0.00                                    |
| Viral                | 1118                          | 68.2  | 210                       | 69.3  | 0.02                                     | 413                          | 75.4  | 208                       | 75.4  | 0.00                                    |
| <b>Prior Therapy</b> |                               |       |                           |       |                                          |                              |       |                           |       |                                         |
| Yes                  | 957                           | 58.4  | 154                       | 50.8  | -0.15                                    | 265                          | 48.4  | 129                       | 46.7  | -0.03                                   |
| No                   | 683                           | 41.7  | 149                       | 49.2  | 0.15                                     | 283                          | 51.6  | 147                       | 53.3  | 0.03                                    |
| <b>Macrovascular</b> |                               |       |                           |       |                                          |                              |       |                           |       |                                         |
| Absence              | 1224                          | 74.6  | 218                       | 71.9  | -0.06                                    | 396                          | 72.3  | 200                       | 72.5  | 0.004                                   |
| Presence             | 414                           | 25.2  | 85                        | 28.1  | 0.06                                     | 152                          | 27.7  | 76                        | 27.5  | -0.004                                  |
| <b>Extrahepatic</b>  |                               |       |                           |       |                                          |                              |       |                           |       |                                         |
| Absence              | 572                           | 34.9  | 88                        | 29.0  | -0.13                                    | 149                          | 27.2  | 79                        | 28.6  | 0.03                                    |
| Presence             | 1068                          | 65.1  | 215                       | 71.0  | 0.13                                     | 399                          | 72.8  | 197                       | 71.4  | -0.03                                   |

**Table S7.** Baseline patient characteristics stratified by antibiotic exposure prior to and after propensity score matching: immunotherapy group.

| Variable             | No antibiotic use<br>N = 696 |       | Antibiotic use<br>N = 129 |       | Mean Squared Differences before matching | No antibiotic use<br>N = 234 |       | Antibiotic use<br>N = 118 |       | Mean Squared Differences after matching |
|----------------------|------------------------------|-------|---------------------------|-------|------------------------------------------|------------------------------|-------|---------------------------|-------|-----------------------------------------|
|                      | Mean/N                       | STD/% | Mean/N                    | STD/% |                                          | Mean/N                       | STD/% | Mean/N                    | STD/% |                                         |
| <b>Age</b>           | 62.75                        | 11.51 | 63.39                     | 11.80 | 0.05                                     | 63.49                        | 11.70 | 62.99                     | 11.76 | -0.04                                   |
| <b>Race</b>          |                              |       |                           |       |                                          |                              |       |                           |       |                                         |
| Asian                | 337                          | 48.4  | 65                        | 50.4  | 0.04                                     | 115                          | 49.1  | 62                        | 52.5  | 0.07                                    |
| Other/Not reported   | 35                           | 5.0   | 11                        | 8.5   | 0.14                                     | 21                           | 9.0   | 10                        | 8.5   | -0.02                                   |
| White                | 312                          | 44.8  | 51                        | 39.5  | -0.11                                    | 98                           | 41.9  | 46                        | 39.0  | -0.06                                   |
| <b>Sex</b>           |                              |       |                           |       |                                          |                              |       |                           |       |                                         |
| Female               | 129                          | 18.5  | 28                        | 21.7  | 0.08                                     | 47                           | 20.1  | 24                        | 20.3  | 0.006                                   |
| Male                 | 567                          | 81.5  | 101                       | 78.3  | -0.08                                    | 187                          | 79.9  | 94                        | 79.7  | -0.006                                  |
| <b>Region</b>        |                              |       |                           |       |                                          |                              |       |                           |       |                                         |
| Asia                 | 307                          | 44.1  | 53                        | 41.1  | -0.06                                    | 95                           | 40.6  | 51                        | 43.2  | 0.05                                    |
| Rest of world        | 388                          | 55.7  | 76                        | 58.9  | 0.06                                     | 139                          | 59.4  | 67                        | 56.8  | -0.05                                   |
| <b>ECOG</b>          |                              |       |                           |       |                                          |                              |       |                           |       |                                         |
| 0                    | 434                          | 62.4  | 72                        | 55.8  | -0.13                                    | 133                          | 56.8  | 67                        | 56.8  | -0.001                                  |
| 1                    | 262                          | 37.6  | 57                        | 44.2  | 0.13                                     | 101                          | 43.2  | 51                        | 43.2  | 0.001                                   |
| <b>Etiology</b>      |                              |       |                           |       |                                          |                              |       |                           |       |                                         |
| Non-viral            | 222                          | 31.9  | 49                        | 38.0  | 0.13                                     | 96                           | 41.0  | 46                        | 39.0  | -0.04                                   |
| Viral                | 458                          | 65.8  | 74                        | 57.4  | -0.17                                    | 138                          | 59.0  | 72                        | 61.0  | 0.04                                    |
| <b>Prior Therapy</b> |                              |       |                           |       |                                          |                              |       |                           |       |                                         |
| No                   | 355                          | 51.0  | 76                        | 58.9  | 0.16                                     | 122                          | 52.1  | 66                        | 55.9  | 0.08                                    |
| Yes                  | 341                          | 49.0  | 53                        | 41.1  | -0.16                                    | 112                          | 47.9  | 52                        | 44.1  | -0.08                                   |
| <b>Immunotherapy</b> |                              |       |                           |       |                                          |                              |       |                           |       |                                         |
| Monotherapy          | 221                          | 31.8  | 29                        | 22.5  | -0.21                                    | 64                           | 27.4  | 28                        | 23.7  | -0.08                                   |
| Combination          | 475                          | 68.2  | 100                       | 77.5  | 0.21                                     | 170                          | 72.6  | 90                        | 76.3  | 0.08                                    |
| <b>Macrovascular</b> |                              |       |                           |       |                                          |                              |       |                           |       |                                         |
| Absence              | 478                          | 68.7  | 90                        | 69.8  | 0.02                                     | 158                          | 67.5  | 81                        | 68.6  | 0.02                                    |
| Presence             | 218                          | 31.3  | 38                        | 29.5  | -0.04                                    | 76                           | 32.5  | 37                        | 31.4  | -0.02                                   |
| <b>Extrahepatic</b>  |                              |       |                           |       |                                          |                              |       |                           |       |                                         |
| Absence              | 236                          | 33.9  | 38                        | 29.5  | -0.10                                    | 64                           | 27.4  | 34                        | 28.8  | 0.03                                    |
| Presence             | 460                          | 66.1  | 91                        | 70.5  | 0.10                                     | 170                          | 72.6  | 84                        | 71.2  | -0.03                                   |

**Table S8.** Baseline patient characteristics stratified by antibiotic exposure prior to and after propensity score matching: placebo group.

| Variable             | No antibiotic use<br>N = 697 |       | Antibiotic use<br>N = 97 |       | Mean Squared Differences before matching | No antibiotic use<br>N = 175 |       | Antibiotic use<br>N = 91 |       | Mean Squared Differences after matching |
|----------------------|------------------------------|-------|--------------------------|-------|------------------------------------------|------------------------------|-------|--------------------------|-------|-----------------------------------------|
|                      | Mean/N                       | STD/% | Mean/N                   | STD/% |                                          | Mean/N                       | STD/% | Mean/N                   | STD/% |                                         |
| <b>Age</b>           | 62.50                        | 11.09 | 62.55                    | 12.11 | 0.004                                    | 62.77                        | 10.72 | 62.56                    | 12.14 | -0.018                                  |
| <b>Race</b>          |                              |       |                          |       |                                          |                              |       |                          |       |                                         |
| Asian                | 300                          | 43.0  | 38                       | 39.2  | -0.08                                    | 69                           | 39.4  | 37                       | 40.7  | 0.025                                   |
| Other/Not reported   | 69                           | 9.9   | 9                        | 9.3   | -0.02                                    | 21                           | 12.0  | 9                        | 9.9   | -0.07                                   |
| White                | 315                          | 45.2  | 46                       | 47.4  | 0.04                                     | 85                           | 48.6  | 45                       | 49.5  | 0.02                                    |
| <b>Sex</b>           |                              |       |                          |       |                                          |                              |       |                          |       |                                         |
| Female               | 89                           | 12.8  | 24                       | 24.7  | 0.31                                     | 41                           | 23.4  | 23                       | 25.3  | 0.04                                    |
| Male                 | 608                          | 87.2  | 73                       | 75.3  | -0.31                                    | 134                          | 76.6  | 68                       | 74.7  | -0.04                                   |
| <b>Region</b>        |                              |       |                          |       |                                          |                              |       |                          |       |                                         |
| Asia                 | 432                          | 62.0  | 61                       | 62.9  | -0.02                                    | 63                           | 36.0  | 35                       | 38.5  | 0.05                                    |
| Rest of world        | 418                          | 60.0  | 45                       | 46.4  | 0.02                                     | 112                          | 64.0  | 56                       | 61.5  | -0.05                                   |
| <b>ECOG</b>          |                              |       |                          |       |                                          |                              |       |                          |       |                                         |
| 0                    | 279                          | 40.0  | 52                       | 53.6  | -0.27                                    | 90                           | 51.4  | 44                       | 48.4  | -0.06                                   |
| 1                    | 10                           | 1.4   | 1                        | 1.0   | 0.27                                     | 85                           | 48.6  | 47                       | 51.6  | 0.06                                    |
| <b>Etiology</b>      |                              |       |                          |       |                                          |                              |       |                          |       |                                         |
| Non-viral            | 264                          | 37.9  | 30                       | 30.9  | -0.15                                    | 50                           | 28.6  | 28                       | 30.8  | 0.05                                    |
| Viral                | 423                          | 60.7  | 66                       | 68.0  | 0.15                                     | 125                          | 71.4  | 63                       | 69.2  | -0.05                                   |
| <b>Prior Therapy</b> |                              |       |                          |       |                                          |                              |       |                          |       |                                         |
| No                   | 0                            | -     | 0                        | -     | -                                        | 0                            | -     | 0                        | -     | -                                       |
| Yes                  | 697                          | -     | 97                       | -     | -                                        | 175                          | -     | 91                       | -     | -                                       |
| <b>Macrovascular</b> |                              |       |                          |       |                                          |                              |       |                          |       |                                         |
| Absence              | 489                          | 70.2  | 62                       | 63.9  | -0.13                                    | 122                          | 69.7  | 59                       | 64.8  | -0.10                                   |
| Presence             | 208                          | 29.8  | 35                       | 36.1  | 0.13                                     | 53                           | 30.3  | 32                       | 35.2  | 0.10                                    |
| <b>Extrahepatic</b>  |                              |       |                          |       |                                          |                              |       |                          |       |                                         |
| Absence              | 197                          | 28.3  | 26                       | 26.8  | -0.03                                    | 54                           | 30.9  | 23                       | 25.3  | -0.12                                   |
| Presence             | 500                          | 71.7  | 71                       | 73.2  | 0.03                                     | 121                          | 69.1  | 68                       | 74.7  | 0.12                                    |

**Table 9.** The relationship between antibiotic use and efficacy outcomes in patients with unresectable/advanced HCC before and after propensity score matching.

|                                        | Unadjusted Analyses |                   | Adjusted using propensity score |                   |
|----------------------------------------|---------------------|-------------------|---------------------------------|-------------------|
|                                        | No Antibiotic Use   | Antibiotic Use    | No Antibiotic Use               | Antibiotic Use    |
| <b>All patients</b>                    |                     |                   |                                 |                   |
| Sample size                            |                     |                   |                                 |                   |
| # patients                             | 3435                | 601               | 1091                            | 550               |
| <b>Progression-free survival (PFS)</b> |                     |                   |                                 |                   |
| Median (95% CI), months                | 4.2 (4.1, 4.5)      | 3.6 (3.0, 4.0)    | 5.4 (4.3, 5.5)                  | 3.6 (3.0, 4.0)    |
| HR* (95% CI)                           | 1.36 (1.23, 1.50)   |                   | 1.39 (1.23, 1.57)               |                   |
| <b>Overall survival (OS)</b>           |                     |                   |                                 |                   |
| Median (95% CI), months                | 10.8 (10.4, 11.3)   | 8.6 (7.9, 9.1)    | 11.1 (10.4, 11.8)               | 8.6 (7.8, 9.2)    |
| HR* (95% CI)                           | 1.42 (1.29, 1.57)   |                   | 1.41 (1.25, 1.59)               |                   |
| <b>Tyrosine kinase inhibitor Group</b> |                     |                   |                                 |                   |
| Sample size                            |                     |                   |                                 |                   |
| # patients                             | 1640                | 303               | 548                             | 276               |
| <b>Progression-free survival (PFS)</b> |                     |                   |                                 |                   |
| Median (95% CI), months                | 5.6 (5.5, 5.7)      | 3.7 (3.6, 4.3)    | 5.5 (4.7, 5.6)                  | 3.7 (3.6, 4.3)    |
| HR (95% CI)                            | 1.40 (1.22, 1.61)   |                   | 1.27 (1.08, 1.51)               |                   |
| <b>Overall survival (OS)</b>           |                     |                   |                                 |                   |
| Median (95% CI), months                | 12.2 (11.6, 13.1)   | 8.4 (7.1, 9.8)    | 12.1 (10.7, 13.9)               | 8.6 (7.1, 10.1)   |
| HR (95% CI)                            | 1.51 (1.31, 1.73)   |                   | 1.41 (1.19, 1.68)               |                   |
| <b>Immunotherapy Group</b>             |                     |                   |                                 |                   |
| Sample size                            |                     |                   |                                 |                   |
| # patients                             | 696                 | 129               | 234                             | 118               |
| <b>Progression-free survival (PFS)</b> |                     |                   |                                 |                   |
| Median (95% CI), months                | 8.2 (7.6, 8.4)      | 8.3 (6.8, 8.9)    | 8.1 (7.0, 8.5)                  | 8.3 (6.7, 8.6)    |
| HR* (95% CI)                           | 1.39 (1.08, 1.78)   |                   | 1.41 (1.06, 1.71)               |                   |
| <b>Overall survival (OS)</b>           |                     |                   |                                 |                   |
| Median (95% CI), months                | 11.4 (10.6, 12.1)   | 10.7 (9.1, 11.8)  | 11.8 (10.4, 12.7)               | 10.7 (9.1, 11.8)  |
| HR* (95% CI)                           | 1.19 (0.94, 1.50)   |                   | 1.19 (0.91, 1.57)               |                   |
| <b>Placebo Group</b>                   |                     |                   |                                 |                   |
| Sample size                            |                     |                   |                                 |                   |
| # patients                             | 697                 | 97                | 175                             | 91                |
| <b>Progression-free survival (PFS)</b> |                     |                   |                                 |                   |
| Median (95% CI), months                | 1.87 (1.81, 1.93)   | 1.61 (1.41, 1.84) | 1.8 (1.7, 2.1)                  | 1.61 (1.41, 1.91) |
| HR (95% CI)                            | 1.29 (1.03, 1.62)   |                   | 1.31 (1.00, 1.71)               |                   |
| <b>Overall survival (OS)</b>           |                     |                   |                                 |                   |
| Median (95% CI), months                | 8.2 (7.4, 8.9)      | 4.4 (3.7, 6.6)    | 6.87 (5.45, 9.40)               | 4.17 (3.45, 5.88) |
| HR (95% CI)                            | 1.58 (1.25, 1.99)   |                   | 1.54 (1.16, 2.05)               |                   |

\* HR is stratified by treatment group (tyrosine kinase inhibitor or immune checkpoint inhibitor alone or immune checkpoint inhibitor combination or Placebo or VEGF for all patients, immune checkpoint inhibitor alone or immune checkpoint inhibitor combination for immune checkpoint inhibitor group).

**Table S10.** The relationship between antibiotic use and efficacy outcomes in patients with unresectable/advanced HCC treated with immune checkpoint inhibitor (ICI) combinations or monotherapy before and after propensity score matching.

|                                                 | <b>Unadjusted Analyses</b> |                       | <b>Adjusted using propensity score</b> |                       |
|-------------------------------------------------|----------------------------|-----------------------|----------------------------------------|-----------------------|
|                                                 | <b>No Antibiotic Use</b>   | <b>Antibiotic Use</b> | <b>No Antibiotic Use</b>               | <b>Antibiotic Use</b> |
| <b>Immune checkpoint inhibitor combinations</b> |                            |                       |                                        |                       |
| Sample size                                     |                            |                       |                                        |                       |
| # patients                                      | 475                        | 100                   | 177                                    | 90                    |
| <b>Progression-free survival (PFS)</b>          |                            |                       |                                        |                       |
| Median (95% CI), months                         | 9.6 (8.5, 9.8)             | 8.6 (8.3, 9.7)        | 11.0 (8.4, 12.1)                       | 8.6 (8.3, 9.7)        |
| HR (95% CI)                                     | 1.33 (0.97, 1.81)          |                       | 1.61 (1.12, 2.33)                      |                       |
| <b>Overall survival (OS)</b>                    |                            |                       |                                        |                       |
| Median (95% CI), months                         | 10.5 (10.0, 11.2)          | 10.2 (9.0, 11.6)      | 11.4 (10.4, 12.1)                      | 10.2 (9.0, 11.6)      |
| HR (95% CI)                                     | 1.13 (0.87, 1.47)          |                       | 1.23 (0.91, 1.68)                      |                       |
| <b>Immune checkpoint inhibitor monotherapy</b>  |                            |                       |                                        |                       |
| Sample size                                     |                            |                       |                                        |                       |
| # patients                                      | 221                        | 29                    | 56                                     | 28                    |
| <b>Progression-free survival (PFS)</b>          |                            |                       |                                        |                       |
| Median (95% CI), months                         | 4.0 (2.8, 4.4)             | 2.1 (1.3, 5.4)        | 4.0 (2.6, 5.4)                         | 2.1 (1.3, 4.2)        |
| HR (95% CI)                                     | 1.51 (1.00, 2.28)          |                       | 1.48 (0.92, 2.38)                      |                       |
| <b>Overall survival (OS)</b>                    |                            |                       |                                        |                       |
| Median (95% CI), months                         | 14.3 (13.2, NE)            | 12.0 (4.6, NE)        | 14.4 (10.5, NE)                        | 11.9 (4.6, NE)        |
| HR (95% CI)                                     | 1.47 (0.88, 2.45)          |                       | 1.61 (0.87, 2.97)                      |                       |

*NE = not estimable*
