# Supplementary material for: Association between antibiotics and adverse oncological outcomes in patients receiving targeted or immune-based therapy for hepatocellular carcinoma
Source: PubMed Central journal article supplement (PMC10183666; doi:10.1016/j.jhepr.2023.100747), 2023-03-30
Supplement: mmc3.pdf [file mmc3.pdf]

## ICMJE DISCLOSURE FORM

**Date:** 3/24/2023

**Your Name:** Lola Fashoyin-Aje

**Manuscript Title:** Association between antibiotic therapy and adverse oncological outcomes from targeted and immune-based therapy in hepatocellular carcinoma.

**Manuscript Number (if known):** JHEPR-D-23-00072-R1

In the interest of transparency, we ask you to disclose all relationships/activities/interests listed below that are related to the content of your manuscript. "Related" means any relation with for-profit or not-for-profit third parties whose interests may be affected by the content of the manuscript. Disclosure represents a commitment to transparency and does not necessarily indicate a bias. If you are in doubt about whether to list a relationship/activity/interest, it is preferable that you do so.

The author's relationships/activities/interests should be defined broadly. For example, if your manuscript pertains to the epidemiology of hypertension, you should declare all relationships with manufacturers of antihypertensive medication, even if that medication is not mentioned in the manuscript.

In item #1 below, report all support for the work reported in this manuscript without time limit. For all other items, the time frame for disclosure is the past 36 months.

|                                                    | Name all entities with whom you have this relationship or indicate none (add rows as needed)                                                                                   | Specifications/Comments (e.g., if payments were made to you or to your institution)                                                                                                                                                                                                                                       |  |  |
|----------------------------------------------------|--------------------------------------------------------------------------------------------------------------------------------------------------------------------------------|---------------------------------------------------------------------------------------------------------------------------------------------------------------------------------------------------------------------------------------------------------------------------------------------------------------------------|--|--|
| Time frame: Since the initial planning of the work |                                                                                                                                                                                |                                                                                                                                                                                                                                                                                                                           |  |  |
| <b>1</b>                                           | All support for the present manuscript (e.g., funding, provision of study materials, medical writing, article processing charges, etc.)<br><b>No time limit for this item.</b> | <input checked="" type="checkbox"/> <b>None</b><br><table border="1" style="width: 100%; height: 20px; margin-top: 5px;"> <tr><td style="width: 50%;"></td><td style="width: 50%;"></td></tr> </table> <div style="text-align: right; font-size: small; margin-top: 5px;">Click the tab key to add additional rows.</div> |  |  |
|                                                    |                                                                                                                                                                                |                                                                                                                                                                                                                                                                                                                           |  |  |
| Time frame: past 36 months                         |                                                                                                                                                                                |                                                                                                                                                                                                                                                                                                                           |  |  |
| <b>2</b>                                           | Grants or contracts from any entity (if not indicated in item #1 above).                                                                                                       | <input checked="" type="checkbox"/> <b>None</b><br><table border="1" style="width: 100%; height: 20px; margin-top: 5px;"> <tr><td style="width: 50%;"></td><td style="width: 50%;"></td></tr> </table>                                                                                                                    |  |  |
|                                                    |                                                                                                                                                                                |                                                                                                                                                                                                                                                                                                                           |  |  |
| <b>3</b>                                           | Royalties or licenses                                                                                                                                                          | <input checked="" type="checkbox"/> <b>None</b><br><table border="1" style="width: 100%; height: 20px; margin-top: 5px;"> <tr><td style="width: 50%;"></td><td style="width: 50%;"></td></tr> </table>                                                                                                                    |  |  |
|                                                    |                                                                                                                                                                                |                                                                                                                                                                                                                                                                                                                           |  |  |

|    |                                                                                                              | Name all entities with whom you have this relationship or indicate none (add rows as needed) | Specifications/Comments (e.g., if payments were made to you or to your institution)                                                         |  |  |  |  |  |  |  |  |
|----|--------------------------------------------------------------------------------------------------------------|----------------------------------------------------------------------------------------------|---------------------------------------------------------------------------------------------------------------------------------------------|--|--|--|--|--|--|--|--|
| 4  | Consulting fees                                                                                              | <input checked="" type="checkbox"/> None                                                     |                                                                                                                                             |  |  |  |  |  |  |  |  |
| 5  | Payment or honoraria for lectures, presentations, speakers bureaus, manuscript writing or educational events | <input checked="" type="checkbox"/> None                                                     | <table border="1"> <tr><td></td><td></td></tr> <tr><td></td><td></td></tr> <tr><td></td><td></td></tr> <tr><td></td><td></td></tr> </table> |  |  |  |  |  |  |  |  |
|    |                                                                                                              |                                                                                              |                                                                                                                                             |  |  |  |  |  |  |  |  |
|    |                                                                                                              |                                                                                              |                                                                                                                                             |  |  |  |  |  |  |  |  |
|    |                                                                                                              |                                                                                              |                                                                                                                                             |  |  |  |  |  |  |  |  |
|    |                                                                                                              |                                                                                              |                                                                                                                                             |  |  |  |  |  |  |  |  |
| 6  | Payment for expert testimony                                                                                 | <input checked="" type="checkbox"/> None                                                     | <table border="1"> <tr><td></td><td></td></tr> <tr><td></td><td></td></tr> <tr><td></td><td></td></tr> </table>                             |  |  |  |  |  |  |  |  |
|    |                                                                                                              |                                                                                              |                                                                                                                                             |  |  |  |  |  |  |  |  |
|    |                                                                                                              |                                                                                              |                                                                                                                                             |  |  |  |  |  |  |  |  |
|    |                                                                                                              |                                                                                              |                                                                                                                                             |  |  |  |  |  |  |  |  |
| 7  | Support for attending meetings and/or travel                                                                 | <input checked="" type="checkbox"/> None                                                     |                                                                                                                                             |  |  |  |  |  |  |  |  |
| 8  | Patents planned, issued or pending                                                                           | <input checked="" type="checkbox"/> None                                                     | <table border="1"> <tr><td></td><td></td></tr> <tr><td></td><td></td></tr> <tr><td></td><td></td></tr> </table>                             |  |  |  |  |  |  |  |  |
|    |                                                                                                              |                                                                                              |                                                                                                                                             |  |  |  |  |  |  |  |  |
|    |                                                                                                              |                                                                                              |                                                                                                                                             |  |  |  |  |  |  |  |  |
|    |                                                                                                              |                                                                                              |                                                                                                                                             |  |  |  |  |  |  |  |  |
| 9  | Participation on a Data Safety Monitoring Board or Advisory Board                                            | <input checked="" type="checkbox"/> None                                                     | <table border="1"> <tr><td></td><td></td></tr> <tr><td></td><td></td></tr> <tr><td></td><td></td></tr> </table>                             |  |  |  |  |  |  |  |  |
|    |                                                                                                              |                                                                                              |                                                                                                                                             |  |  |  |  |  |  |  |  |
|    |                                                                                                              |                                                                                              |                                                                                                                                             |  |  |  |  |  |  |  |  |
|    |                                                                                                              |                                                                                              |                                                                                                                                             |  |  |  |  |  |  |  |  |
| 10 | Leadership or fiduciary role in other board, society, committee or advocacy group, paid or unpaid            | <input checked="" type="checkbox"/> None                                                     | <table border="1"> <tr><td></td><td></td></tr> <tr><td></td><td></td></tr> <tr><td></td><td></td></tr> </table>                             |  |  |  |  |  |  |  |  |
|    |                                                                                                              |                                                                                              |                                                                                                                                             |  |  |  |  |  |  |  |  |
|    |                                                                                                              |                                                                                              |                                                                                                                                             |  |  |  |  |  |  |  |  |
|    |                                                                                                              |                                                                                              |                                                                                                                                             |  |  |  |  |  |  |  |  |

|           |                                                                                  | Name all entities with whom you have this relationship or indicate none (add rows as needed) | Specifications/Comments (e.g., if payments were made to you or to your institution) |
|-----------|----------------------------------------------------------------------------------|----------------------------------------------------------------------------------------------|-------------------------------------------------------------------------------------|
| <b>11</b> | Stock or stock options                                                           | <input checked="" type="checkbox"/> <b>None</b>                                              |                                                                                     |
|           |                                                                                  |                                                                                              |                                                                                     |
|           |                                                                                  |                                                                                              |                                                                                     |
| <b>12</b> | Receipt of equipment, materials, drugs, medical writing, gifts or other services | <input checked="" type="checkbox"/> <b>None</b>                                              |                                                                                     |
|           |                                                                                  |                                                                                              |                                                                                     |
|           |                                                                                  |                                                                                              |                                                                                     |
| <b>13</b> | Other financial or non-financial interests                                       | <input type="checkbox"/> <b>None</b>                                                         |                                                                                     |
|           |                                                                                  | Lola Fashoyin-Aje is employed by the US FDA.                                                 |                                                                                     |
|           |                                                                                  |                                                                                              |                                                                                     |

Please place an "X" next to the following statement to indicate your agreement:

I certify that I have answered every question and have not altered the wording of any of the questions on this form.

## ICMJE DISCLOSURE FORM

**Date:** 3/24/2023

**Your Name:** Claudia A.M. Fulgenzi

**Manuscript Title:** Association between antibiotic therapy and adverse oncological outcomes from targeted and immune-based therapy in hepatocellular carcinoma.

**Manuscript Number (if known):** JHEPR-D-23-00072-R1

In the interest of transparency, we ask you to disclose all relationships/activities/interests listed below that are related to the content of your manuscript. "Related" means any relation with for-profit or not-for-profit third parties whose interests may be affected by the content of the manuscript. Disclosure represents a commitment to transparency and does not necessarily indicate a bias. If you are in doubt about whether to list a relationship/activity/interest, it is preferable that you do so.

The author's relationships/activities/interests should be defined broadly. For example, if your manuscript pertains to the epidemiology of hypertension, you should declare all relationships with manufacturers of antihypertensive medication, even if that medication is not mentioned in the manuscript.

In item #1 below, report all support for the work reported in this manuscript without time limit. For all other items, the time frame for disclosure is the past 36 months.

|                                                    | Name all entities with whom you have this relationship or indicate none (add rows as needed)                                                                                   | Specifications/Comments (e.g., if payments were made to you or to your institution)                                                                                                                                                                                                                                       |  |  |
|----------------------------------------------------|--------------------------------------------------------------------------------------------------------------------------------------------------------------------------------|---------------------------------------------------------------------------------------------------------------------------------------------------------------------------------------------------------------------------------------------------------------------------------------------------------------------------|--|--|
| Time frame: Since the initial planning of the work |                                                                                                                                                                                |                                                                                                                                                                                                                                                                                                                           |  |  |
| <b>1</b>                                           | All support for the present manuscript (e.g., funding, provision of study materials, medical writing, article processing charges, etc.)<br><b>No time limit for this item.</b> | <input checked="" type="checkbox"/> <b>None</b><br><table border="1" style="width: 100%; height: 20px; margin-top: 5px;"> <tr><td style="width: 50%;"></td><td style="width: 50%;"></td></tr> </table> <div style="text-align: right; font-size: small; margin-top: 5px;">Click the tab key to add additional rows.</div> |  |  |
|                                                    |                                                                                                                                                                                |                                                                                                                                                                                                                                                                                                                           |  |  |
| Time frame: past 36 months                         |                                                                                                                                                                                |                                                                                                                                                                                                                                                                                                                           |  |  |
| <b>2</b>                                           | Grants or contracts from any entity (if not indicated in item #1 above).                                                                                                       | <input checked="" type="checkbox"/> <b>None</b><br><table border="1" style="width: 100%; height: 20px; margin-top: 5px;"> <tr><td style="width: 50%;"></td><td style="width: 50%;"></td></tr> </table>                                                                                                                    |  |  |
|                                                    |                                                                                                                                                                                |                                                                                                                                                                                                                                                                                                                           |  |  |
| <b>3</b>                                           | Royalties or licenses                                                                                                                                                          | <input checked="" type="checkbox"/> <b>None</b><br><table border="1" style="width: 100%; height: 20px; margin-top: 5px;"> <tr><td style="width: 50%;"></td><td style="width: 50%;"></td></tr> </table>                                                                                                                    |  |  |
|                                                    |                                                                                                                                                                                |                                                                                                                                                                                                                                                                                                                           |  |  |

|    |                                                                                                              | Name all entities with whom you have this relationship or indicate none (add rows as needed) | Specifications/Comments (e.g., if payments were made to you or to your institution)                                                         |  |  |  |  |  |  |  |  |
|----|--------------------------------------------------------------------------------------------------------------|----------------------------------------------------------------------------------------------|---------------------------------------------------------------------------------------------------------------------------------------------|--|--|--|--|--|--|--|--|
| 4  | Consulting fees                                                                                              | <input checked="" type="checkbox"/> None                                                     |                                                                                                                                             |  |  |  |  |  |  |  |  |
| 5  | Payment or honoraria for lectures, presentations, speakers bureaus, manuscript writing or educational events | <input checked="" type="checkbox"/> None                                                     | <table border="1"> <tr><td></td><td></td></tr> <tr><td></td><td></td></tr> <tr><td></td><td></td></tr> <tr><td></td><td></td></tr> </table> |  |  |  |  |  |  |  |  |
|    |                                                                                                              |                                                                                              |                                                                                                                                             |  |  |  |  |  |  |  |  |
|    |                                                                                                              |                                                                                              |                                                                                                                                             |  |  |  |  |  |  |  |  |
|    |                                                                                                              |                                                                                              |                                                                                                                                             |  |  |  |  |  |  |  |  |
|    |                                                                                                              |                                                                                              |                                                                                                                                             |  |  |  |  |  |  |  |  |
| 6  | Payment for expert testimony                                                                                 | <input checked="" type="checkbox"/> None                                                     | <table border="1"> <tr><td></td><td></td></tr> <tr><td></td><td></td></tr> <tr><td></td><td></td></tr> </table>                             |  |  |  |  |  |  |  |  |
|    |                                                                                                              |                                                                                              |                                                                                                                                             |  |  |  |  |  |  |  |  |
|    |                                                                                                              |                                                                                              |                                                                                                                                             |  |  |  |  |  |  |  |  |
|    |                                                                                                              |                                                                                              |                                                                                                                                             |  |  |  |  |  |  |  |  |
| 7  | Support for attending meetings and/or travel                                                                 | <input checked="" type="checkbox"/> None                                                     |                                                                                                                                             |  |  |  |  |  |  |  |  |
| 8  | Patents planned, issued or pending                                                                           | <input checked="" type="checkbox"/> None                                                     | <table border="1"> <tr><td></td><td></td></tr> <tr><td></td><td></td></tr> <tr><td></td><td></td></tr> </table>                             |  |  |  |  |  |  |  |  |
|    |                                                                                                              |                                                                                              |                                                                                                                                             |  |  |  |  |  |  |  |  |
|    |                                                                                                              |                                                                                              |                                                                                                                                             |  |  |  |  |  |  |  |  |
|    |                                                                                                              |                                                                                              |                                                                                                                                             |  |  |  |  |  |  |  |  |
| 9  | Participation on a Data Safety Monitoring Board or Advisory Board                                            | <input checked="" type="checkbox"/> None                                                     | <table border="1"> <tr><td></td><td></td></tr> <tr><td></td><td></td></tr> <tr><td></td><td></td></tr> </table>                             |  |  |  |  |  |  |  |  |
|    |                                                                                                              |                                                                                              |                                                                                                                                             |  |  |  |  |  |  |  |  |
|    |                                                                                                              |                                                                                              |                                                                                                                                             |  |  |  |  |  |  |  |  |
|    |                                                                                                              |                                                                                              |                                                                                                                                             |  |  |  |  |  |  |  |  |
| 10 | Leadership or fiduciary role in other board, society, committee or advocacy group, paid or unpaid            | <input checked="" type="checkbox"/> None                                                     | <table border="1"> <tr><td></td><td></td></tr> <tr><td></td><td></td></tr> <tr><td></td><td></td></tr> </table>                             |  |  |  |  |  |  |  |  |
|    |                                                                                                              |                                                                                              |                                                                                                                                             |  |  |  |  |  |  |  |  |
|    |                                                                                                              |                                                                                              |                                                                                                                                             |  |  |  |  |  |  |  |  |
|    |                                                                                                              |                                                                                              |                                                                                                                                             |  |  |  |  |  |  |  |  |

|           |                                                                                  | Name all entities with whom you have this relationship or indicate none (add rows as needed)                                                                                                                                                                                                                         | Specifications/Comments (e.g., if payments were made to you or to your institution) |  |  |  |  |  |  |
|-----------|----------------------------------------------------------------------------------|----------------------------------------------------------------------------------------------------------------------------------------------------------------------------------------------------------------------------------------------------------------------------------------------------------------------|-------------------------------------------------------------------------------------|--|--|--|--|--|--|
| <b>11</b> | Stock or stock options                                                           | <input checked="" type="checkbox"/> <b>None</b><br><table border="1" style="width: 100%; border-collapse: collapse;"> <tr><td style="width: 50%; height: 15px;"></td><td style="width: 50%;"></td></tr> <tr><td style="height: 15px;"></td><td></td></tr> <tr><td style="height: 15px;"></td><td></td></tr> </table> |                                                                                     |  |  |  |  |  |  |
|           |                                                                                  |                                                                                                                                                                                                                                                                                                                      |                                                                                     |  |  |  |  |  |  |
|           |                                                                                  |                                                                                                                                                                                                                                                                                                                      |                                                                                     |  |  |  |  |  |  |
|           |                                                                                  |                                                                                                                                                                                                                                                                                                                      |                                                                                     |  |  |  |  |  |  |
| <b>12</b> | Receipt of equipment, materials, drugs, medical writing, gifts or other services | <input checked="" type="checkbox"/> <b>None</b><br><table border="1" style="width: 100%; border-collapse: collapse;"> <tr><td style="width: 50%; height: 15px;"></td><td style="width: 50%;"></td></tr> <tr><td style="height: 15px;"></td><td></td></tr> <tr><td style="height: 15px;"></td><td></td></tr> </table> |                                                                                     |  |  |  |  |  |  |
|           |                                                                                  |                                                                                                                                                                                                                                                                                                                      |                                                                                     |  |  |  |  |  |  |
|           |                                                                                  |                                                                                                                                                                                                                                                                                                                      |                                                                                     |  |  |  |  |  |  |
|           |                                                                                  |                                                                                                                                                                                                                                                                                                                      |                                                                                     |  |  |  |  |  |  |
| <b>13</b> | Other financial or non-financial interests                                       | <input checked="" type="checkbox"/> <b>None</b><br><table border="1" style="width: 100%; border-collapse: collapse;"> <tr><td style="width: 50%; height: 15px;"></td><td style="width: 50%;"></td></tr> <tr><td style="height: 15px;"></td><td></td></tr> </table>                                                   |                                                                                     |  |  |  |  |  |  |
|           |                                                                                  |                                                                                                                                                                                                                                                                                                                      |                                                                                     |  |  |  |  |  |  |
|           |                                                                                  |                                                                                                                                                                                                                                                                                                                      |                                                                                     |  |  |  |  |  |  |

**Please place an "X" next to the following statement to indicate your agreement:**

I certify that I have answered every question and have not altered the wording of any of the questions on this form.

## ICMJE DISCLOSURE FORM

**Date:** 2/23/2023

**Your Name:** Alessio Cortellini

**Manuscript Title:** Association between antibiotic therapy and adverse oncological outcomes from targeted and immune-based therapy in hepatocellular carcinoma.

**Manuscript Number (if known):** JHEPR-D-23-00072-R1

In the interest of transparency, we ask you to disclose all relationships/activities/interests listed below that are related to the content of your manuscript. "Related" means any relation with for-profit or not-for-profit third parties whose interests may be affected by the content of the manuscript. Disclosure represents a commitment to transparency and does not necessarily indicate a bias. If you are in doubt about whether to list a relationship/activity/interest, it is preferable that you do so.

The author's relationships/activities/interests should be defined broadly. For example, if your manuscript pertains to the epidemiology of hypertension, you should declare all relationships with manufacturers of antihypertensive medication, even if that medication is not mentioned in the manuscript.

In item #1 below, report all support for the work reported in this manuscript without time limit. For all other items, the time frame for disclosure is the past 36 months.

|                                                           |                                                                                                                                                                                | Name all entities with whom you have this relationship or indicate none (add rows as needed)                                                                                                                                                         | Specifications/Comments (e.g., if payments were made to you or to your institution) |  |                                                                                                                                                                                                                                                 |  |  |
|-----------------------------------------------------------|--------------------------------------------------------------------------------------------------------------------------------------------------------------------------------|------------------------------------------------------------------------------------------------------------------------------------------------------------------------------------------------------------------------------------------------------|-------------------------------------------------------------------------------------|--|-------------------------------------------------------------------------------------------------------------------------------------------------------------------------------------------------------------------------------------------------|--|--|
| <b>Time frame: Since the initial planning of the work</b> |                                                                                                                                                                                |                                                                                                                                                                                                                                                      |                                                                                     |  |                                                                                                                                                                                                                                                 |  |  |
| <b>1</b>                                                  | All support for the present manuscript (e.g., funding, provision of study materials, medical writing, article processing charges, etc.)<br><b>No time limit for this item.</b> | <input checked="" type="checkbox"/> <b>None</b><br><table border="1" style="width: 100%; height: 20px; margin-top: 5px;"> <tr><td style="width: 60%;"></td><td style="width: 40%;"></td></tr> </table>                                               |                                                                                     |  | <table border="1" style="width: 100%; height: 20px; margin-top: 5px;"> <tr><td style="width: 60%;"></td><td style="width: 40%;"></td></tr> </table> <p style="font-size: small; margin-top: 5px;">Click the tab key to add additional rows.</p> |  |  |
|                                                           |                                                                                                                                                                                |                                                                                                                                                                                                                                                      |                                                                                     |  |                                                                                                                                                                                                                                                 |  |  |
|                                                           |                                                                                                                                                                                |                                                                                                                                                                                                                                                      |                                                                                     |  |                                                                                                                                                                                                                                                 |  |  |
| <b>Time frame: past 36 months</b>                         |                                                                                                                                                                                |                                                                                                                                                                                                                                                      |                                                                                     |  |                                                                                                                                                                                                                                                 |  |  |
| <b>2</b>                                                  | Grants or contracts from any entity (if not indicated in item #1 above).                                                                                                       | <input type="checkbox"/> <b>None</b><br><table border="1" style="width: 100%; height: 20px; margin-top: 5px;"> <tr><td style="width: 60%;">Alessio Cortellini is supported by the NIHR Imperial BRC.</td><td style="width: 40%;"></td></tr> </table> | Alessio Cortellini is supported by the NIHR Imperial BRC.                           |  | <table border="1" style="width: 100%; height: 20px; margin-top: 5px;"> <tr><td style="width: 60%;"></td><td style="width: 40%;"></td></tr> </table>                                                                                             |  |  |
| Alessio Cortellini is supported by the NIHR Imperial BRC. |                                                                                                                                                                                |                                                                                                                                                                                                                                                      |                                                                                     |  |                                                                                                                                                                                                                                                 |  |  |
|                                                           |                                                                                                                                                                                |                                                                                                                                                                                                                                                      |                                                                                     |  |                                                                                                                                                                                                                                                 |  |  |
| <b>3</b>                                                  | Royalties or licenses                                                                                                                                                          | <input checked="" type="checkbox"/> <b>None</b><br><table border="1" style="width: 100%; height: 20px; margin-top: 5px;"> <tr><td style="width: 60%;"></td><td style="width: 40%;"></td></tr> </table>                                               |                                                                                     |  | <table border="1" style="width: 100%; height: 20px; margin-top: 5px;"> <tr><td style="width: 60%;"></td><td style="width: 40%;"></td></tr> </table>                                                                                             |  |  |
|                                                           |                                                                                                                                                                                |                                                                                                                                                                                                                                                      |                                                                                     |  |                                                                                                                                                                                                                                                 |  |  |
|                                                           |                                                                                                                                                                                |                                                                                                                                                                                                                                                      |                                                                                     |  |                                                                                                                                                                                                                                                 |  |  |

|                                                                                      |                                                                                                              | Name all entities with whom you have this relationship or indicate none (add rows as needed)                                                                                                                                                                                                                     | Specifications/Comments (e.g., if payments were made to you or to your institution)  |  |  |  |  |  |  |  |  |
|--------------------------------------------------------------------------------------|--------------------------------------------------------------------------------------------------------------|------------------------------------------------------------------------------------------------------------------------------------------------------------------------------------------------------------------------------------------------------------------------------------------------------------------|--------------------------------------------------------------------------------------|--|--|--|--|--|--|--|--|
| 4                                                                                    | Consulting fees                                                                                              | <input type="checkbox"/> <b>None</b><br><table border="1" data-bbox="383 258 1516 325"> <tr> <td>Alessio Cortellini received consulting fees from MSD, Astra Zeneca, Roche and BMS.</td> <td></td> </tr> </table>                                                                                                | Alessio Cortellini received consulting fees from MSD, Astra Zeneca, Roche and BMS.   |  |  |  |  |  |  |  |  |
| Alessio Cortellini received consulting fees from MSD, Astra Zeneca, Roche and BMS.   |                                                                                                              |                                                                                                                                                                                                                                                                                                                  |                                                                                      |  |  |  |  |  |  |  |  |
| 5                                                                                    | Payment or honoraria for lectures, presentations, speakers bureaus, manuscript writing or educational events | <input type="checkbox"/> <b>None</b><br><table border="1" data-bbox="383 478 1516 678"> <tr> <td>Alessio Cortellini also received speaker fees from Novartis, Astra Zeneca and EISAI.</td> <td></td> </tr> <tr> <td></td> <td></td> </tr> <tr> <td></td> <td></td> </tr> <tr> <td></td> <td></td> </tr> </table> | Alessio Cortellini also received speaker fees from Novartis, Astra Zeneca and EISAI. |  |  |  |  |  |  |  |  |
| Alessio Cortellini also received speaker fees from Novartis, Astra Zeneca and EISAI. |                                                                                                              |                                                                                                                                                                                                                                                                                                                  |                                                                                      |  |  |  |  |  |  |  |  |
|                                                                                      |                                                                                                              |                                                                                                                                                                                                                                                                                                                  |                                                                                      |  |  |  |  |  |  |  |  |
|                                                                                      |                                                                                                              |                                                                                                                                                                                                                                                                                                                  |                                                                                      |  |  |  |  |  |  |  |  |
|                                                                                      |                                                                                                              |                                                                                                                                                                                                                                                                                                                  |                                                                                      |  |  |  |  |  |  |  |  |
| 6                                                                                    | Payment for expert testimony                                                                                 | <input checked="" type="checkbox"/> <b>None</b><br><table border="1" data-bbox="383 821 1516 921"> <tr> <td></td> <td></td> </tr> <tr> <td></td> <td></td> </tr> <tr> <td></td> <td></td> </tr> </table>                                                                                                         |                                                                                      |  |  |  |  |  |  |  |  |
|                                                                                      |                                                                                                              |                                                                                                                                                                                                                                                                                                                  |                                                                                      |  |  |  |  |  |  |  |  |
|                                                                                      |                                                                                                              |                                                                                                                                                                                                                                                                                                                  |                                                                                      |  |  |  |  |  |  |  |  |
|                                                                                      |                                                                                                              |                                                                                                                                                                                                                                                                                                                  |                                                                                      |  |  |  |  |  |  |  |  |
| 7                                                                                    | Support for attending meetings and/or travel                                                                 | <input checked="" type="checkbox"/> <b>None</b>                                                                                                                                                                                                                                                                  |                                                                                      |  |  |  |  |  |  |  |  |
| 8                                                                                    | Patents planned, issued or pending                                                                           | <input checked="" type="checkbox"/> <b>None</b><br><table border="1" data-bbox="383 1255 1516 1356"> <tr> <td></td> <td></td> </tr> <tr> <td></td> <td></td> </tr> <tr> <td></td> <td></td> </tr> </table>                                                                                                       |                                                                                      |  |  |  |  |  |  |  |  |
|                                                                                      |                                                                                                              |                                                                                                                                                                                                                                                                                                                  |                                                                                      |  |  |  |  |  |  |  |  |
|                                                                                      |                                                                                                              |                                                                                                                                                                                                                                                                                                                  |                                                                                      |  |  |  |  |  |  |  |  |
|                                                                                      |                                                                                                              |                                                                                                                                                                                                                                                                                                                  |                                                                                      |  |  |  |  |  |  |  |  |
| 9                                                                                    | Participation on a Data Safety Monitoring Board or Advisory Board                                            | <input checked="" type="checkbox"/> <b>None</b><br><table border="1" data-bbox="383 1472 1516 1572"> <tr> <td></td> <td></td> </tr> <tr> <td></td> <td></td> </tr> <tr> <td></td> <td></td> </tr> </table>                                                                                                       |                                                                                      |  |  |  |  |  |  |  |  |
|                                                                                      |                                                                                                              |                                                                                                                                                                                                                                                                                                                  |                                                                                      |  |  |  |  |  |  |  |  |
|                                                                                      |                                                                                                              |                                                                                                                                                                                                                                                                                                                  |                                                                                      |  |  |  |  |  |  |  |  |
|                                                                                      |                                                                                                              |                                                                                                                                                                                                                                                                                                                  |                                                                                      |  |  |  |  |  |  |  |  |
| 10                                                                                   | Leadership or fiduciary role in other board, society, committee or advocacy group, paid or unpaid            | <input checked="" type="checkbox"/> <b>None</b><br><table border="1" data-bbox="383 1661 1516 1761"> <tr> <td></td> <td></td> </tr> <tr> <td></td> <td></td> </tr> <tr> <td></td> <td></td> </tr> </table>                                                                                                       |                                                                                      |  |  |  |  |  |  |  |  |
|                                                                                      |                                                                                                              |                                                                                                                                                                                                                                                                                                                  |                                                                                      |  |  |  |  |  |  |  |  |
|                                                                                      |                                                                                                              |                                                                                                                                                                                                                                                                                                                  |                                                                                      |  |  |  |  |  |  |  |  |
|                                                                                      |                                                                                                              |                                                                                                                                                                                                                                                                                                                  |                                                                                      |  |  |  |  |  |  |  |  |



|           |                                                                                  | Name all entities with whom you have this relationship or indicate none (add rows as needed)                                                                                                                                                                                                                         | Specifications/Comments (e.g., if payments were made to you or to your institution) |  |  |  |  |  |  |
|-----------|----------------------------------------------------------------------------------|----------------------------------------------------------------------------------------------------------------------------------------------------------------------------------------------------------------------------------------------------------------------------------------------------------------------|-------------------------------------------------------------------------------------|--|--|--|--|--|--|
| <b>11</b> | Stock or stock options                                                           | <input checked="" type="checkbox"/> <b>None</b><br><table border="1" style="width: 100%; border-collapse: collapse;"> <tr><td style="width: 50%; height: 15px;"></td><td style="width: 50%;"></td></tr> <tr><td style="height: 15px;"></td><td></td></tr> <tr><td style="height: 15px;"></td><td></td></tr> </table> |                                                                                     |  |  |  |  |  |  |
|           |                                                                                  |                                                                                                                                                                                                                                                                                                                      |                                                                                     |  |  |  |  |  |  |
|           |                                                                                  |                                                                                                                                                                                                                                                                                                                      |                                                                                     |  |  |  |  |  |  |
|           |                                                                                  |                                                                                                                                                                                                                                                                                                                      |                                                                                     |  |  |  |  |  |  |
| <b>12</b> | Receipt of equipment, materials, drugs, medical writing, gifts or other services | <input checked="" type="checkbox"/> <b>None</b><br><table border="1" style="width: 100%; border-collapse: collapse;"> <tr><td style="width: 50%; height: 15px;"></td><td style="width: 50%;"></td></tr> <tr><td style="height: 15px;"></td><td></td></tr> <tr><td style="height: 15px;"></td><td></td></tr> </table> |                                                                                     |  |  |  |  |  |  |
|           |                                                                                  |                                                                                                                                                                                                                                                                                                                      |                                                                                     |  |  |  |  |  |  |
|           |                                                                                  |                                                                                                                                                                                                                                                                                                                      |                                                                                     |  |  |  |  |  |  |
|           |                                                                                  |                                                                                                                                                                                                                                                                                                                      |                                                                                     |  |  |  |  |  |  |
| <b>13</b> | Other financial or non-financial interests                                       | <input checked="" type="checkbox"/> <b>None</b><br><table border="1" style="width: 100%; border-collapse: collapse;"> <tr><td style="width: 50%; height: 15px;"></td><td style="width: 50%;"></td></tr> </table>                                                                                                     |                                                                                     |  |  |  |  |  |  |
|           |                                                                                  |                                                                                                                                                                                                                                                                                                                      |                                                                                     |  |  |  |  |  |  |

**Please place an "X" next to the following statement to indicate your agreement:**

I certify that I have answered every question and have not altered the wording of any of the questions on this form.

## ICMJE DISCLOSURE FORM

**Date:** 2/23/2023

**Your Name:** Antonio D'Alessio

**Manuscript Title:** Association between antibiotic therapy and adverse oncological outcomes from targeted and immune-based therapy in hepatocellular carcinoma.

**Manuscript Number (if known):** JHEPR-D-23-00072-R1

In the interest of transparency, we ask you to disclose all relationships/activities/interests listed below that are related to the content of your manuscript. "Related" means any relation with for-profit or not-for-profit third parties whose interests may be affected by the content of the manuscript. Disclosure represents a commitment to transparency and does not necessarily indicate a bias. If you are in doubt about whether to list a relationship/activity/interest, it is preferable that you do so.

The author's relationships/activities/interests should be defined broadly. For example, if your manuscript pertains to the epidemiology of hypertension, you should declare all relationships with manufacturers of antihypertensive medication, even if that medication is not mentioned in the manuscript.

In item #1 below, report all support for the work reported in this manuscript without time limit. For all other items, the time frame for disclosure is the past 36 months.

|                                                                                                                                                                                                                        | Name all entities with whom you have this relationship or indicate none (add rows as needed)                                                                                   | Specifications/Comments (e.g., if payments were made to you or to your institution)                                                                                                                                                                                                                                                                                                                                                                                                |                                                                                                                                                                                                                        |                                           |  |  |  |  |
|------------------------------------------------------------------------------------------------------------------------------------------------------------------------------------------------------------------------|--------------------------------------------------------------------------------------------------------------------------------------------------------------------------------|------------------------------------------------------------------------------------------------------------------------------------------------------------------------------------------------------------------------------------------------------------------------------------------------------------------------------------------------------------------------------------------------------------------------------------------------------------------------------------|------------------------------------------------------------------------------------------------------------------------------------------------------------------------------------------------------------------------|-------------------------------------------|--|--|--|--|
| Time frame: Since the initial planning of the work                                                                                                                                                                     |                                                                                                                                                                                |                                                                                                                                                                                                                                                                                                                                                                                                                                                                                    |                                                                                                                                                                                                                        |                                           |  |  |  |  |
| <b>1</b>                                                                                                                                                                                                               | All support for the present manuscript (e.g., funding, provision of study materials, medical writing, article processing charges, etc.)<br><b>No time limit for this item.</b> | <input checked="" type="checkbox"/> <b>None</b><br><table border="1" style="width: 100%; height: 20px; margin-top: 5px;"> <tr><td> </td></tr> </table> <table border="1" style="width: 100%; height: 20px; margin-top: 5px;"> <tr><td style="text-align: right; font-size: small;">Click the tab key to add additional rows.</td></tr> </table>                                                                                                                                    |                                                                                                                                                                                                                        | Click the tab key to add additional rows. |  |  |  |  |
|                                                                                                                                                                                                                        |                                                                                                                                                                                |                                                                                                                                                                                                                                                                                                                                                                                                                                                                                    |                                                                                                                                                                                                                        |                                           |  |  |  |  |
| Click the tab key to add additional rows.                                                                                                                                                                              |                                                                                                                                                                                |                                                                                                                                                                                                                                                                                                                                                                                                                                                                                    |                                                                                                                                                                                                                        |                                           |  |  |  |  |
| Time frame: past 36 months                                                                                                                                                                                             |                                                                                                                                                                                |                                                                                                                                                                                                                                                                                                                                                                                                                                                                                    |                                                                                                                                                                                                                        |                                           |  |  |  |  |
| <b>2</b>                                                                                                                                                                                                               | Grants or contracts from any entity (if not indicated in item #1 above).                                                                                                       | <input type="checkbox"/> <b>None</b><br><table border="1" style="width: 100%; height: 100px; margin-top: 5px;"> <tr> <td style="width: 60%;">Antonio D'Alessio is supported by the NIHR Imperial BRC and by grant funding from the European Association for the Study of the Liver (Andrew Burroughs Fellowship) and from Cancer Research UK (RCCPDB-Nov21/100008).</td> <td style="width: 40%;"> </td> </tr> <tr><td> </td><td> </td></tr> <tr><td> </td><td> </td></tr> </table> | Antonio D'Alessio is supported by the NIHR Imperial BRC and by grant funding from the European Association for the Study of the Liver (Andrew Burroughs Fellowship) and from Cancer Research UK (RCCPDB-Nov21/100008). |                                           |  |  |  |  |
| Antonio D'Alessio is supported by the NIHR Imperial BRC and by grant funding from the European Association for the Study of the Liver (Andrew Burroughs Fellowship) and from Cancer Research UK (RCCPDB-Nov21/100008). |                                                                                                                                                                                |                                                                                                                                                                                                                                                                                                                                                                                                                                                                                    |                                                                                                                                                                                                                        |                                           |  |  |  |  |
|                                                                                                                                                                                                                        |                                                                                                                                                                                |                                                                                                                                                                                                                                                                                                                                                                                                                                                                                    |                                                                                                                                                                                                                        |                                           |  |  |  |  |
|                                                                                                                                                                                                                        |                                                                                                                                                                                |                                                                                                                                                                                                                                                                                                                                                                                                                                                                                    |                                                                                                                                                                                                                        |                                           |  |  |  |  |

|           |                                                                                                              | Name all entities with whom you have this relationship or indicate none (add rows as needed) | Specifications/Comments (e.g., if payments were made to you or to your institution) |
|-----------|--------------------------------------------------------------------------------------------------------------|----------------------------------------------------------------------------------------------|-------------------------------------------------------------------------------------|
| <b>3</b>  | Royalties or licenses                                                                                        | <input checked="" type="checkbox"/> <b>None</b>                                              |                                                                                     |
|           |                                                                                                              |                                                                                              |                                                                                     |
|           |                                                                                                              |                                                                                              |                                                                                     |
| <b>4</b>  | Consulting fees                                                                                              | <input type="checkbox"/> <b>None</b>                                                         |                                                                                     |
|           |                                                                                                              | Antonio D'Alessio received consulting fees from Roche                                        |                                                                                     |
| <b>5</b>  | Payment or honoraria for lectures, presentations, speakers bureaus, manuscript writing or educational events | <input type="checkbox"/> <b>None</b>                                                         |                                                                                     |
|           |                                                                                                              |                                                                                              |                                                                                     |
|           |                                                                                                              |                                                                                              |                                                                                     |
| <b>6</b>  | Payment for expert testimony                                                                                 | <input checked="" type="checkbox"/> <b>None</b>                                              |                                                                                     |
|           |                                                                                                              |                                                                                              |                                                                                     |
|           |                                                                                                              |                                                                                              |                                                                                     |
| <b>7</b>  | Support for attending meetings and/or travel                                                                 | <input type="checkbox"/> <b>None</b>                                                         |                                                                                     |
|           |                                                                                                              | Antonio D'Alessio received support for attending meeting from Roche.                         |                                                                                     |
| <b>8</b>  | Patents planned, issued or pending                                                                           | <input checked="" type="checkbox"/> <b>None</b>                                              |                                                                                     |
|           |                                                                                                              |                                                                                              |                                                                                     |
|           |                                                                                                              |                                                                                              |                                                                                     |
| <b>9</b>  | Participation on a Data Safety Monitoring Board or Advisory Board                                            | <input checked="" type="checkbox"/> <b>None</b>                                              |                                                                                     |
|           |                                                                                                              |                                                                                              |                                                                                     |
|           |                                                                                                              |                                                                                              |                                                                                     |
| <b>10</b> | Leadership or fiduciary role in other board, society,                                                        | <input checked="" type="checkbox"/> <b>None</b>                                              |                                                                                     |
|           |                                                                                                              |                                                                                              |                                                                                     |

|           |                                                                                  | Name all entities with whom you have this relationship or indicate none (add rows as needed) | Specifications/Comments (e.g., if payments were made to you or to your institution) |
|-----------|----------------------------------------------------------------------------------|----------------------------------------------------------------------------------------------|-------------------------------------------------------------------------------------|
|           | committee or advocacy group, paid or unpaid                                      |                                                                                              |                                                                                     |
| <b>11</b> | Stock or stock options                                                           | <input checked="" type="checkbox"/> <b>None</b>                                              |                                                                                     |
|           |                                                                                  |                                                                                              |                                                                                     |
|           |                                                                                  |                                                                                              |                                                                                     |
| <b>12</b> | Receipt of equipment, materials, drugs, medical writing, gifts or other services | <input checked="" type="checkbox"/> <b>None</b>                                              |                                                                                     |
|           |                                                                                  |                                                                                              |                                                                                     |
|           |                                                                                  |                                                                                              |                                                                                     |
| <b>13</b> | Other financial or non-financial interests                                       | <input checked="" type="checkbox"/> <b>None</b>                                              |                                                                                     |
|           |                                                                                  |                                                                                              |                                                                                     |

**Please place an "X" next to the following statement to indicate your agreement:**

I certify that I have answered every question and have not altered the wording of any of the questions on this form.

## ICMJE DISCLOSURE FORM

**Date:** 3/24/2023

**Your Name:** Donna R. Rivera

**Manuscript Title:** Association between antibiotic therapy and adverse oncological outcomes from targeted and immune-based therapy in hepatocellular carcinoma.

**Manuscript Number (if known):** JHEPR-D-23-00072-R1

In the interest of transparency, we ask you to disclose all relationships/activities/interests listed below that are related to the content of your manuscript. "Related" means any relation with for-profit or not-for-profit third parties whose interests may be affected by the content of the manuscript. Disclosure represents a commitment to transparency and does not necessarily indicate a bias. If you are in doubt about whether to list a relationship/activity/interest, it is preferable that you do so.

The author's relationships/activities/interests should be defined broadly. For example, if your manuscript pertains to the epidemiology of hypertension, you should declare all relationships with manufacturers of antihypertensive medication, even if that medication is not mentioned in the manuscript.

In item #1 below, report all support for the work reported in this manuscript without time limit. For all other items, the time frame for disclosure is the past 36 months.

|                                                    | Name all entities with whom you have this relationship or indicate none (add rows as needed)                                                                                   | Specifications/Comments (e.g., if payments were made to you or to your institution)                                                                                                                                                                                                                                       |  |  |
|----------------------------------------------------|--------------------------------------------------------------------------------------------------------------------------------------------------------------------------------|---------------------------------------------------------------------------------------------------------------------------------------------------------------------------------------------------------------------------------------------------------------------------------------------------------------------------|--|--|
| Time frame: Since the initial planning of the work |                                                                                                                                                                                |                                                                                                                                                                                                                                                                                                                           |  |  |
| <b>1</b>                                           | All support for the present manuscript (e.g., funding, provision of study materials, medical writing, article processing charges, etc.)<br><b>No time limit for this item.</b> | <input checked="" type="checkbox"/> <b>None</b><br><table border="1" style="width: 100%; height: 20px; margin-top: 5px;"> <tr><td style="width: 50%;"></td><td style="width: 50%;"></td></tr> </table> <div style="text-align: right; font-size: small; margin-top: 5px;">Click the tab key to add additional rows.</div> |  |  |
|                                                    |                                                                                                                                                                                |                                                                                                                                                                                                                                                                                                                           |  |  |
| Time frame: past 36 months                         |                                                                                                                                                                                |                                                                                                                                                                                                                                                                                                                           |  |  |
| <b>2</b>                                           | Grants or contracts from any entity (if not indicated in item #1 above).                                                                                                       | <input checked="" type="checkbox"/> <b>None</b><br><table border="1" style="width: 100%; height: 20px; margin-top: 5px;"> <tr><td style="width: 50%;"></td><td style="width: 50%;"></td></tr> </table>                                                                                                                    |  |  |
|                                                    |                                                                                                                                                                                |                                                                                                                                                                                                                                                                                                                           |  |  |
| <b>3</b>                                           | Royalties or licenses                                                                                                                                                          | <input checked="" type="checkbox"/> <b>None</b><br><table border="1" style="width: 100%; height: 20px; margin-top: 5px;"> <tr><td style="width: 50%;"></td><td style="width: 50%;"></td></tr> </table>                                                                                                                    |  |  |
|                                                    |                                                                                                                                                                                |                                                                                                                                                                                                                                                                                                                           |  |  |

|    |                                                                                                              | Name all entities with whom you have this relationship or indicate none (add rows as needed) | Specifications/Comments (e.g., if payments were made to you or to your institution)                                                         |  |  |  |  |  |  |  |  |
|----|--------------------------------------------------------------------------------------------------------------|----------------------------------------------------------------------------------------------|---------------------------------------------------------------------------------------------------------------------------------------------|--|--|--|--|--|--|--|--|
| 4  | Consulting fees                                                                                              | <input checked="" type="checkbox"/> None                                                     |                                                                                                                                             |  |  |  |  |  |  |  |  |
| 5  | Payment or honoraria for lectures, presentations, speakers bureaus, manuscript writing or educational events | <input checked="" type="checkbox"/> None                                                     | <table border="1"> <tr><td></td><td></td></tr> <tr><td></td><td></td></tr> <tr><td></td><td></td></tr> <tr><td></td><td></td></tr> </table> |  |  |  |  |  |  |  |  |
|    |                                                                                                              |                                                                                              |                                                                                                                                             |  |  |  |  |  |  |  |  |
|    |                                                                                                              |                                                                                              |                                                                                                                                             |  |  |  |  |  |  |  |  |
|    |                                                                                                              |                                                                                              |                                                                                                                                             |  |  |  |  |  |  |  |  |
|    |                                                                                                              |                                                                                              |                                                                                                                                             |  |  |  |  |  |  |  |  |
| 6  | Payment for expert testimony                                                                                 | <input checked="" type="checkbox"/> None                                                     | <table border="1"> <tr><td></td><td></td></tr> <tr><td></td><td></td></tr> <tr><td></td><td></td></tr> </table>                             |  |  |  |  |  |  |  |  |
|    |                                                                                                              |                                                                                              |                                                                                                                                             |  |  |  |  |  |  |  |  |
|    |                                                                                                              |                                                                                              |                                                                                                                                             |  |  |  |  |  |  |  |  |
|    |                                                                                                              |                                                                                              |                                                                                                                                             |  |  |  |  |  |  |  |  |
| 7  | Support for attending meetings and/or travel                                                                 | <input checked="" type="checkbox"/> None                                                     |                                                                                                                                             |  |  |  |  |  |  |  |  |
| 8  | Patents planned, issued or pending                                                                           | <input checked="" type="checkbox"/> None                                                     | <table border="1"> <tr><td></td><td></td></tr> <tr><td></td><td></td></tr> <tr><td></td><td></td></tr> </table>                             |  |  |  |  |  |  |  |  |
|    |                                                                                                              |                                                                                              |                                                                                                                                             |  |  |  |  |  |  |  |  |
|    |                                                                                                              |                                                                                              |                                                                                                                                             |  |  |  |  |  |  |  |  |
|    |                                                                                                              |                                                                                              |                                                                                                                                             |  |  |  |  |  |  |  |  |
| 9  | Participation on a Data Safety Monitoring Board or Advisory Board                                            | <input checked="" type="checkbox"/> None                                                     | <table border="1"> <tr><td></td><td></td></tr> <tr><td></td><td></td></tr> <tr><td></td><td></td></tr> </table>                             |  |  |  |  |  |  |  |  |
|    |                                                                                                              |                                                                                              |                                                                                                                                             |  |  |  |  |  |  |  |  |
|    |                                                                                                              |                                                                                              |                                                                                                                                             |  |  |  |  |  |  |  |  |
|    |                                                                                                              |                                                                                              |                                                                                                                                             |  |  |  |  |  |  |  |  |
| 10 | Leadership or fiduciary role in other board, society, committee or advocacy group, paid or unpaid            | <input checked="" type="checkbox"/> None                                                     | <table border="1"> <tr><td></td><td></td></tr> <tr><td></td><td></td></tr> <tr><td></td><td></td></tr> </table>                             |  |  |  |  |  |  |  |  |
|    |                                                                                                              |                                                                                              |                                                                                                                                             |  |  |  |  |  |  |  |  |
|    |                                                                                                              |                                                                                              |                                                                                                                                             |  |  |  |  |  |  |  |  |
|    |                                                                                                              |                                                                                              |                                                                                                                                             |  |  |  |  |  |  |  |  |

|           |                                                                                  | Name all entities with whom you have this relationship or indicate none (add rows as needed) | Specifications/Comments (e.g., if payments were made to you or to your institution) |
|-----------|----------------------------------------------------------------------------------|----------------------------------------------------------------------------------------------|-------------------------------------------------------------------------------------|
| <b>11</b> | Stock or stock options                                                           | <input checked="" type="checkbox"/> <b>None</b>                                              |                                                                                     |
|           |                                                                                  |                                                                                              |                                                                                     |
|           |                                                                                  |                                                                                              |                                                                                     |
| <b>12</b> | Receipt of equipment, materials, drugs, medical writing, gifts or other services | <input checked="" type="checkbox"/> <b>None</b>                                              |                                                                                     |
|           |                                                                                  |                                                                                              |                                                                                     |
|           |                                                                                  |                                                                                              |                                                                                     |
| <b>13</b> | Other financial or non-financial interests                                       | <input type="checkbox"/> <b>None</b>                                                         |                                                                                     |
|           |                                                                                  | Donna R. Rivera is employed by the US FDA.                                                   |                                                                                     |
|           |                                                                                  |                                                                                              |                                                                                     |

Please place an "X" next to the following statement to indicate your agreement:

I certify that I have answered every question and have not altered the wording of any of the questions on this form.

## ICMJE DISCLOSURE FORM

**Date:** 3/24/2023

**Your Name:** Guo Wei

**Manuscript Title:** Association between antibiotic therapy and adverse oncological outcomes from targeted and immune-based therapy in hepatocellular carcinoma.

**Manuscript Number (if known):** JHEPR-D-23-00072-R1

In the interest of transparency, we ask you to disclose all relationships/activities/interests listed below that are related to the content of your manuscript. "Related" means any relation with for-profit or not-for-profit third parties whose interests may be affected by the content of the manuscript. Disclosure represents a commitment to transparency and does not necessarily indicate a bias. If you are in doubt about whether to list a relationship/activity/interest, it is preferable that you do so.

The author's relationships/activities/interests should be defined broadly. For example, if your manuscript pertains to the epidemiology of hypertension, you should declare all relationships with manufacturers of antihypertensive medication, even if that medication is not mentioned in the manuscript.

In item #1 below, report all support for the work reported in this manuscript without time limit. For all other items, the time frame for disclosure is the past 36 months.

|                                                    | Name all entities with whom you have this relationship or indicate none (add rows as needed)                                                                                   | Specifications/Comments (e.g., if payments were made to you or to your institution)                                                                                                                                                                                                                                       |  |  |
|----------------------------------------------------|--------------------------------------------------------------------------------------------------------------------------------------------------------------------------------|---------------------------------------------------------------------------------------------------------------------------------------------------------------------------------------------------------------------------------------------------------------------------------------------------------------------------|--|--|
| Time frame: Since the initial planning of the work |                                                                                                                                                                                |                                                                                                                                                                                                                                                                                                                           |  |  |
| <b>1</b>                                           | All support for the present manuscript (e.g., funding, provision of study materials, medical writing, article processing charges, etc.)<br><b>No time limit for this item.</b> | <input checked="" type="checkbox"/> <b>None</b><br><table border="1" style="width: 100%; height: 20px; margin-top: 5px;"> <tr><td style="width: 50%;"></td><td style="width: 50%;"></td></tr> </table> <div style="text-align: right; font-size: small; margin-top: 5px;">Click the tab key to add additional rows.</div> |  |  |
|                                                    |                                                                                                                                                                                |                                                                                                                                                                                                                                                                                                                           |  |  |
| Time frame: past 36 months                         |                                                                                                                                                                                |                                                                                                                                                                                                                                                                                                                           |  |  |
| <b>2</b>                                           | Grants or contracts from any entity (if not indicated in item #1 above).                                                                                                       | <input checked="" type="checkbox"/> <b>None</b><br><table border="1" style="width: 100%; height: 20px; margin-top: 5px;"> <tr><td style="width: 50%;"></td><td style="width: 50%;"></td></tr> </table>                                                                                                                    |  |  |
|                                                    |                                                                                                                                                                                |                                                                                                                                                                                                                                                                                                                           |  |  |
| <b>3</b>                                           | Royalties or licenses                                                                                                                                                          | <input checked="" type="checkbox"/> <b>None</b><br><table border="1" style="width: 100%; height: 20px; margin-top: 5px;"> <tr><td style="width: 50%;"></td><td style="width: 50%;"></td></tr> </table>                                                                                                                    |  |  |
|                                                    |                                                                                                                                                                                |                                                                                                                                                                                                                                                                                                                           |  |  |



|    |                                                                                                              | Name all entities with whom you have this relationship or indicate none (add rows as needed) | Specifications/Comments (e.g., if payments were made to you or to your institution)                                                         |  |  |  |  |  |  |  |  |
|----|--------------------------------------------------------------------------------------------------------------|----------------------------------------------------------------------------------------------|---------------------------------------------------------------------------------------------------------------------------------------------|--|--|--|--|--|--|--|--|
| 4  | Consulting fees                                                                                              | <input checked="" type="checkbox"/> None                                                     |                                                                                                                                             |  |  |  |  |  |  |  |  |
| 5  | Payment or honoraria for lectures, presentations, speakers bureaus, manuscript writing or educational events | <input checked="" type="checkbox"/> None                                                     | <table border="1"> <tr><td></td><td></td></tr> <tr><td></td><td></td></tr> <tr><td></td><td></td></tr> <tr><td></td><td></td></tr> </table> |  |  |  |  |  |  |  |  |
|    |                                                                                                              |                                                                                              |                                                                                                                                             |  |  |  |  |  |  |  |  |
|    |                                                                                                              |                                                                                              |                                                                                                                                             |  |  |  |  |  |  |  |  |
|    |                                                                                                              |                                                                                              |                                                                                                                                             |  |  |  |  |  |  |  |  |
|    |                                                                                                              |                                                                                              |                                                                                                                                             |  |  |  |  |  |  |  |  |
| 6  | Payment for expert testimony                                                                                 | <input checked="" type="checkbox"/> None                                                     | <table border="1"> <tr><td></td><td></td></tr> <tr><td></td><td></td></tr> <tr><td></td><td></td></tr> </table>                             |  |  |  |  |  |  |  |  |
|    |                                                                                                              |                                                                                              |                                                                                                                                             |  |  |  |  |  |  |  |  |
|    |                                                                                                              |                                                                                              |                                                                                                                                             |  |  |  |  |  |  |  |  |
|    |                                                                                                              |                                                                                              |                                                                                                                                             |  |  |  |  |  |  |  |  |
| 7  | Support for attending meetings and/or travel                                                                 | <input checked="" type="checkbox"/> None                                                     |                                                                                                                                             |  |  |  |  |  |  |  |  |
| 8  | Patents planned, issued or pending                                                                           | <input checked="" type="checkbox"/> None                                                     | <table border="1"> <tr><td></td><td></td></tr> <tr><td></td><td></td></tr> <tr><td></td><td></td></tr> </table>                             |  |  |  |  |  |  |  |  |
|    |                                                                                                              |                                                                                              |                                                                                                                                             |  |  |  |  |  |  |  |  |
|    |                                                                                                              |                                                                                              |                                                                                                                                             |  |  |  |  |  |  |  |  |
|    |                                                                                                              |                                                                                              |                                                                                                                                             |  |  |  |  |  |  |  |  |
| 9  | Participation on a Data Safety Monitoring Board or Advisory Board                                            | <input checked="" type="checkbox"/> None                                                     | <table border="1"> <tr><td></td><td></td></tr> <tr><td></td><td></td></tr> <tr><td></td><td></td></tr> </table>                             |  |  |  |  |  |  |  |  |
|    |                                                                                                              |                                                                                              |                                                                                                                                             |  |  |  |  |  |  |  |  |
|    |                                                                                                              |                                                                                              |                                                                                                                                             |  |  |  |  |  |  |  |  |
|    |                                                                                                              |                                                                                              |                                                                                                                                             |  |  |  |  |  |  |  |  |
| 10 | Leadership or fiduciary role in other board, society, committee or advocacy group, paid or unpaid            | <input checked="" type="checkbox"/> None                                                     | <table border="1"> <tr><td></td><td></td></tr> <tr><td></td><td></td></tr> <tr><td></td><td></td></tr> </table>                             |  |  |  |  |  |  |  |  |
|    |                                                                                                              |                                                                                              |                                                                                                                                             |  |  |  |  |  |  |  |  |
|    |                                                                                                              |                                                                                              |                                                                                                                                             |  |  |  |  |  |  |  |  |
|    |                                                                                                              |                                                                                              |                                                                                                                                             |  |  |  |  |  |  |  |  |

|           |                                                                                  | Name all entities with whom you have this relationship or indicate none (add rows as needed) | Specifications/Comments (e.g., if payments were made to you or to your institution) |
|-----------|----------------------------------------------------------------------------------|----------------------------------------------------------------------------------------------|-------------------------------------------------------------------------------------|
| <b>11</b> | Stock or stock options                                                           | <input checked="" type="checkbox"/> <b>None</b>                                              |                                                                                     |
|           |                                                                                  |                                                                                              |                                                                                     |
|           |                                                                                  |                                                                                              |                                                                                     |
| <b>12</b> | Receipt of equipment, materials, drugs, medical writing, gifts or other services | <input checked="" type="checkbox"/> <b>None</b>                                              |                                                                                     |
|           |                                                                                  |                                                                                              |                                                                                     |
|           |                                                                                  |                                                                                              |                                                                                     |
| <b>13</b> | Other financial or non-financial interests                                       | <input type="checkbox"/> <b>None</b>                                                         |                                                                                     |
|           |                                                                                  | Guo Wei is employed by the US FDA.                                                           |                                                                                     |
|           |                                                                                  |                                                                                              |                                                                                     |

Please place an "X" next to the following statement to indicate your agreement:

I certify that I have answered every question and have not altered the wording of any of the questions on this form.

## ICMJE DISCLOSURE FORM

**Date:** 3/24/2023

**Your Name:** Julie Schneider

**Manuscript Title:** Association between antibiotic therapy and adverse oncological outcomes from targeted and immune-based therapy in hepatocellular carcinoma.

**Manuscript Number (if known):** JHEPR-D-23-00072-R1

In the interest of transparency, we ask you to disclose all relationships/activities/interests listed below that are related to the content of your manuscript. "Related" means any relation with for-profit or not-for-profit third parties whose interests may be affected by the content of the manuscript. Disclosure represents a commitment to transparency and does not necessarily indicate a bias. If you are in doubt about whether to list a relationship/activity/interest, it is preferable that you do so.

The author's relationships/activities/interests should be defined broadly. For example, if your manuscript pertains to the epidemiology of hypertension, you should declare all relationships with manufacturers of antihypertensive medication, even if that medication is not mentioned in the manuscript.

In item #1 below, report all support for the work reported in this manuscript without time limit. For all other items, the time frame for disclosure is the past 36 months.

|                                                    | Name all entities with whom you have this relationship or indicate none (add rows as needed)                                                                                   | Specifications/Comments (e.g., if payments were made to you or to your institution)                                                                                                                                                                                                                                       |  |  |
|----------------------------------------------------|--------------------------------------------------------------------------------------------------------------------------------------------------------------------------------|---------------------------------------------------------------------------------------------------------------------------------------------------------------------------------------------------------------------------------------------------------------------------------------------------------------------------|--|--|
| Time frame: Since the initial planning of the work |                                                                                                                                                                                |                                                                                                                                                                                                                                                                                                                           |  |  |
| <b>1</b>                                           | All support for the present manuscript (e.g., funding, provision of study materials, medical writing, article processing charges, etc.)<br><b>No time limit for this item.</b> | <input checked="" type="checkbox"/> <b>None</b><br><table border="1" style="width: 100%; height: 20px; margin-top: 5px;"> <tr><td style="width: 50%;"></td><td style="width: 50%;"></td></tr> </table> <div style="text-align: right; font-size: small; margin-top: 5px;">Click the tab key to add additional rows.</div> |  |  |
|                                                    |                                                                                                                                                                                |                                                                                                                                                                                                                                                                                                                           |  |  |
| Time frame: past 36 months                         |                                                                                                                                                                                |                                                                                                                                                                                                                                                                                                                           |  |  |
| <b>2</b>                                           | Grants or contracts from any entity (if not indicated in item #1 above).                                                                                                       | <input checked="" type="checkbox"/> <b>None</b><br><table border="1" style="width: 100%; height: 20px; margin-top: 5px;"> <tr><td style="width: 50%;"></td><td style="width: 50%;"></td></tr> </table>                                                                                                                    |  |  |
|                                                    |                                                                                                                                                                                |                                                                                                                                                                                                                                                                                                                           |  |  |
| <b>3</b>                                           | Royalties or licenses                                                                                                                                                          | <input checked="" type="checkbox"/> <b>None</b><br><table border="1" style="width: 100%; height: 20px; margin-top: 5px;"> <tr><td style="width: 50%;"></td><td style="width: 50%;"></td></tr> </table>                                                                                                                    |  |  |
|                                                    |                                                                                                                                                                                |                                                                                                                                                                                                                                                                                                                           |  |  |

|    |                                                                                                              | Name all entities with whom you have this relationship or indicate none (add rows as needed) | Specifications/Comments (e.g., if payments were made to you or to your institution)                                                         |  |  |  |  |  |  |  |  |
|----|--------------------------------------------------------------------------------------------------------------|----------------------------------------------------------------------------------------------|---------------------------------------------------------------------------------------------------------------------------------------------|--|--|--|--|--|--|--|--|
| 4  | Consulting fees                                                                                              | <input checked="" type="checkbox"/> None                                                     |                                                                                                                                             |  |  |  |  |  |  |  |  |
| 5  | Payment or honoraria for lectures, presentations, speakers bureaus, manuscript writing or educational events | <input checked="" type="checkbox"/> None                                                     | <table border="1"> <tr><td></td><td></td></tr> <tr><td></td><td></td></tr> <tr><td></td><td></td></tr> <tr><td></td><td></td></tr> </table> |  |  |  |  |  |  |  |  |
|    |                                                                                                              |                                                                                              |                                                                                                                                             |  |  |  |  |  |  |  |  |
|    |                                                                                                              |                                                                                              |                                                                                                                                             |  |  |  |  |  |  |  |  |
|    |                                                                                                              |                                                                                              |                                                                                                                                             |  |  |  |  |  |  |  |  |
|    |                                                                                                              |                                                                                              |                                                                                                                                             |  |  |  |  |  |  |  |  |
| 6  | Payment for expert testimony                                                                                 | <input checked="" type="checkbox"/> None                                                     | <table border="1"> <tr><td></td><td></td></tr> <tr><td></td><td></td></tr> <tr><td></td><td></td></tr> </table>                             |  |  |  |  |  |  |  |  |
|    |                                                                                                              |                                                                                              |                                                                                                                                             |  |  |  |  |  |  |  |  |
|    |                                                                                                              |                                                                                              |                                                                                                                                             |  |  |  |  |  |  |  |  |
|    |                                                                                                              |                                                                                              |                                                                                                                                             |  |  |  |  |  |  |  |  |
| 7  | Support for attending meetings and/or travel                                                                 | <input checked="" type="checkbox"/> None                                                     |                                                                                                                                             |  |  |  |  |  |  |  |  |
| 8  | Patents planned, issued or pending                                                                           | <input checked="" type="checkbox"/> None                                                     | <table border="1"> <tr><td></td><td></td></tr> <tr><td></td><td></td></tr> <tr><td></td><td></td></tr> </table>                             |  |  |  |  |  |  |  |  |
|    |                                                                                                              |                                                                                              |                                                                                                                                             |  |  |  |  |  |  |  |  |
|    |                                                                                                              |                                                                                              |                                                                                                                                             |  |  |  |  |  |  |  |  |
|    |                                                                                                              |                                                                                              |                                                                                                                                             |  |  |  |  |  |  |  |  |
| 9  | Participation on a Data Safety Monitoring Board or Advisory Board                                            | <input checked="" type="checkbox"/> None                                                     | <table border="1"> <tr><td></td><td></td></tr> <tr><td></td><td></td></tr> <tr><td></td><td></td></tr> </table>                             |  |  |  |  |  |  |  |  |
|    |                                                                                                              |                                                                                              |                                                                                                                                             |  |  |  |  |  |  |  |  |
|    |                                                                                                              |                                                                                              |                                                                                                                                             |  |  |  |  |  |  |  |  |
|    |                                                                                                              |                                                                                              |                                                                                                                                             |  |  |  |  |  |  |  |  |
| 10 | Leadership or fiduciary role in other board, society, committee or advocacy group, paid or unpaid            | <input checked="" type="checkbox"/> None                                                     | <table border="1"> <tr><td></td><td></td></tr> <tr><td></td><td></td></tr> <tr><td></td><td></td></tr> </table>                             |  |  |  |  |  |  |  |  |
|    |                                                                                                              |                                                                                              |                                                                                                                                             |  |  |  |  |  |  |  |  |
|    |                                                                                                              |                                                                                              |                                                                                                                                             |  |  |  |  |  |  |  |  |
|    |                                                                                                              |                                                                                              |                                                                                                                                             |  |  |  |  |  |  |  |  |

|           |                                                                                  | Name all entities with whom you have this relationship or indicate none (add rows as needed) | Specifications/Comments (e.g., if payments were made to you or to your institution) |
|-----------|----------------------------------------------------------------------------------|----------------------------------------------------------------------------------------------|-------------------------------------------------------------------------------------|
| <b>11</b> | Stock or stock options                                                           | <input checked="" type="checkbox"/> <b>None</b>                                              |                                                                                     |
|           |                                                                                  |                                                                                              |                                                                                     |
|           |                                                                                  |                                                                                              |                                                                                     |
| <b>12</b> | Receipt of equipment, materials, drugs, medical writing, gifts or other services | <input checked="" type="checkbox"/> <b>None</b>                                              |                                                                                     |
|           |                                                                                  |                                                                                              |                                                                                     |
|           |                                                                                  |                                                                                              |                                                                                     |
| <b>13</b> | Other financial or non-financial interests                                       | <input type="checkbox"/> <b>None</b>                                                         |                                                                                     |
|           |                                                                                  | Julie Schneider is employed by the US FDA.                                                   |                                                                                     |
|           |                                                                                  |                                                                                              |                                                                                     |

Please place an "X" next to the following statement to indicate your agreement:

I certify that I have answered every question and have not altered the wording of any of the questions on this form.

## ICMJE DISCLOSURE FORM

**Date:** 3/24/2023

**Your Name:** Lorraine Pelosof

**Manuscript Title:** Association between antibiotic therapy and adverse oncological outcomes from targeted and immune-based therapy in hepatocellular carcinoma.

**Manuscript Number (if known):** JHEPR-D-23-00072-R1

In the interest of transparency, we ask you to disclose all relationships/activities/interests listed below that are related to the content of your manuscript. "Related" means any relation with for-profit or not-for-profit third parties whose interests may be affected by the content of the manuscript. Disclosure represents a commitment to transparency and does not necessarily indicate a bias. If you are in doubt about whether to list a relationship/activity/interest, it is preferable that you do so.

The author's relationships/activities/interests should be defined broadly. For example, if your manuscript pertains to the epidemiology of hypertension, you should declare all relationships with manufacturers of antihypertensive medication, even if that medication is not mentioned in the manuscript.

In item #1 below, report all support for the work reported in this manuscript without time limit. For all other items, the time frame for disclosure is the past 36 months.

|                                                    | Name all entities with whom you have this relationship or indicate none (add rows as needed)                                                                                   | Specifications/Comments (e.g., if payments were made to you or to your institution)                                                                                                                                                                                                                                       |  |  |
|----------------------------------------------------|--------------------------------------------------------------------------------------------------------------------------------------------------------------------------------|---------------------------------------------------------------------------------------------------------------------------------------------------------------------------------------------------------------------------------------------------------------------------------------------------------------------------|--|--|
| Time frame: Since the initial planning of the work |                                                                                                                                                                                |                                                                                                                                                                                                                                                                                                                           |  |  |
| <b>1</b>                                           | All support for the present manuscript (e.g., funding, provision of study materials, medical writing, article processing charges, etc.)<br><b>No time limit for this item.</b> | <input checked="" type="checkbox"/> <b>None</b><br><table border="1" style="width: 100%; height: 20px; margin-top: 5px;"> <tr><td style="width: 50%;"></td><td style="width: 50%;"></td></tr> </table> <div style="text-align: right; font-size: small; margin-top: 5px;">Click the tab key to add additional rows.</div> |  |  |
|                                                    |                                                                                                                                                                                |                                                                                                                                                                                                                                                                                                                           |  |  |
| Time frame: past 36 months                         |                                                                                                                                                                                |                                                                                                                                                                                                                                                                                                                           |  |  |
| <b>2</b>                                           | Grants or contracts from any entity (if not indicated in item #1 above).                                                                                                       | <input checked="" type="checkbox"/> <b>None</b><br><table border="1" style="width: 100%; height: 20px; margin-top: 5px;"> <tr><td style="width: 50%;"></td><td style="width: 50%;"></td></tr> </table>                                                                                                                    |  |  |
|                                                    |                                                                                                                                                                                |                                                                                                                                                                                                                                                                                                                           |  |  |
| <b>3</b>                                           | Royalties or licenses                                                                                                                                                          | <input checked="" type="checkbox"/> <b>None</b><br><table border="1" style="width: 100%; height: 20px; margin-top: 5px;"> <tr><td style="width: 50%;"></td><td style="width: 50%;"></td></tr> </table>                                                                                                                    |  |  |
|                                                    |                                                                                                                                                                                |                                                                                                                                                                                                                                                                                                                           |  |  |

|    |                                                                                                              | Name all entities with whom you have this relationship or indicate none (add rows as needed) | Specifications/Comments (e.g., if payments were made to you or to your institution)                                                         |  |  |  |  |  |  |  |  |
|----|--------------------------------------------------------------------------------------------------------------|----------------------------------------------------------------------------------------------|---------------------------------------------------------------------------------------------------------------------------------------------|--|--|--|--|--|--|--|--|
| 4  | Consulting fees                                                                                              | <input checked="" type="checkbox"/> None                                                     |                                                                                                                                             |  |  |  |  |  |  |  |  |
| 5  | Payment or honoraria for lectures, presentations, speakers bureaus, manuscript writing or educational events | <input checked="" type="checkbox"/> None                                                     | <table border="1"> <tr><td></td><td></td></tr> <tr><td></td><td></td></tr> <tr><td></td><td></td></tr> <tr><td></td><td></td></tr> </table> |  |  |  |  |  |  |  |  |
|    |                                                                                                              |                                                                                              |                                                                                                                                             |  |  |  |  |  |  |  |  |
|    |                                                                                                              |                                                                                              |                                                                                                                                             |  |  |  |  |  |  |  |  |
|    |                                                                                                              |                                                                                              |                                                                                                                                             |  |  |  |  |  |  |  |  |
|    |                                                                                                              |                                                                                              |                                                                                                                                             |  |  |  |  |  |  |  |  |
| 6  | Payment for expert testimony                                                                                 | <input checked="" type="checkbox"/> None                                                     | <table border="1"> <tr><td></td><td></td></tr> <tr><td></td><td></td></tr> <tr><td></td><td></td></tr> </table>                             |  |  |  |  |  |  |  |  |
|    |                                                                                                              |                                                                                              |                                                                                                                                             |  |  |  |  |  |  |  |  |
|    |                                                                                                              |                                                                                              |                                                                                                                                             |  |  |  |  |  |  |  |  |
|    |                                                                                                              |                                                                                              |                                                                                                                                             |  |  |  |  |  |  |  |  |
| 7  | Support for attending meetings and/or travel                                                                 | <input checked="" type="checkbox"/> None                                                     |                                                                                                                                             |  |  |  |  |  |  |  |  |
| 8  | Patents planned, issued or pending                                                                           | <input checked="" type="checkbox"/> None                                                     | <table border="1"> <tr><td></td><td></td></tr> <tr><td></td><td></td></tr> <tr><td></td><td></td></tr> </table>                             |  |  |  |  |  |  |  |  |
|    |                                                                                                              |                                                                                              |                                                                                                                                             |  |  |  |  |  |  |  |  |
|    |                                                                                                              |                                                                                              |                                                                                                                                             |  |  |  |  |  |  |  |  |
|    |                                                                                                              |                                                                                              |                                                                                                                                             |  |  |  |  |  |  |  |  |
| 9  | Participation on a Data Safety Monitoring Board or Advisory Board                                            | <input checked="" type="checkbox"/> None                                                     | <table border="1"> <tr><td></td><td></td></tr> <tr><td></td><td></td></tr> <tr><td></td><td></td></tr> </table>                             |  |  |  |  |  |  |  |  |
|    |                                                                                                              |                                                                                              |                                                                                                                                             |  |  |  |  |  |  |  |  |
|    |                                                                                                              |                                                                                              |                                                                                                                                             |  |  |  |  |  |  |  |  |
|    |                                                                                                              |                                                                                              |                                                                                                                                             |  |  |  |  |  |  |  |  |
| 10 | Leadership or fiduciary role in other board, society, committee or advocacy group, paid or unpaid            | <input checked="" type="checkbox"/> None                                                     | <table border="1"> <tr><td></td><td></td></tr> <tr><td></td><td></td></tr> <tr><td></td><td></td></tr> </table>                             |  |  |  |  |  |  |  |  |
|    |                                                                                                              |                                                                                              |                                                                                                                                             |  |  |  |  |  |  |  |  |
|    |                                                                                                              |                                                                                              |                                                                                                                                             |  |  |  |  |  |  |  |  |
|    |                                                                                                              |                                                                                              |                                                                                                                                             |  |  |  |  |  |  |  |  |

|           |                                                                                  | Name all entities with whom you have this relationship or indicate none (add rows as needed) | Specifications/Comments (e.g., if payments were made to you or to your institution) |
|-----------|----------------------------------------------------------------------------------|----------------------------------------------------------------------------------------------|-------------------------------------------------------------------------------------|
| <b>11</b> | Stock or stock options                                                           | <input checked="" type="checkbox"/> <b>None</b>                                              |                                                                                     |
|           |                                                                                  |                                                                                              |                                                                                     |
|           |                                                                                  |                                                                                              |                                                                                     |
| <b>12</b> | Receipt of equipment, materials, drugs, medical writing, gifts or other services | <input checked="" type="checkbox"/> <b>None</b>                                              |                                                                                     |
|           |                                                                                  |                                                                                              |                                                                                     |
|           |                                                                                  |                                                                                              |                                                                                     |
| <b>13</b> | Other financial or non-financial interests                                       | <input type="checkbox"/> <b>None</b>                                                         |                                                                                     |
|           |                                                                                  | Lorraine Pelosof is employed by the US FDA.                                                  |                                                                                     |
|           |                                                                                  |                                                                                              |                                                                                     |

Please place an "X" next to the following statement to indicate your agreement:

I certify that I have answered every question and have not altered the wording of any of the questions on this form.



## ICMJE DISCLOSURE FORM

**Date:** 3/24/2023

**Your Name:** Marc R. Theoret

**Manuscript Title:** Association between antibiotic therapy and adverse oncological outcomes from targeted and immune-based therapy in hepatocellular carcinoma.

**Manuscript Number (if known):** JHEPR-D-23-00072-R1

In the interest of transparency, we ask you to disclose all relationships/activities/interests listed below that are related to the content of your manuscript. "Related" means any relation with for-profit or not-for-profit third parties whose interests may be affected by the content of the manuscript. Disclosure represents a commitment to transparency and does not necessarily indicate a bias. If you are in doubt about whether to list a relationship/activity/interest, it is preferable that you do so.

The author's relationships/activities/interests should be defined broadly. For example, if your manuscript pertains to the epidemiology of hypertension, you should declare all relationships with manufacturers of antihypertensive medication, even if that medication is not mentioned in the manuscript.

In item #1 below, report all support for the work reported in this manuscript without time limit. For all other items, the time frame for disclosure is the past 36 months.

|                                                    | Name all entities with whom you have this relationship or indicate none (add rows as needed)                                                                                   | Specifications/Comments (e.g., if payments were made to you or to your institution)                                                                                                                                                                                                                                       |  |  |
|----------------------------------------------------|--------------------------------------------------------------------------------------------------------------------------------------------------------------------------------|---------------------------------------------------------------------------------------------------------------------------------------------------------------------------------------------------------------------------------------------------------------------------------------------------------------------------|--|--|
| Time frame: Since the initial planning of the work |                                                                                                                                                                                |                                                                                                                                                                                                                                                                                                                           |  |  |
| <b>1</b>                                           | All support for the present manuscript (e.g., funding, provision of study materials, medical writing, article processing charges, etc.)<br><b>No time limit for this item.</b> | <input checked="" type="checkbox"/> <b>None</b><br><table border="1" style="width: 100%; height: 20px; margin-top: 5px;"> <tr><td style="width: 50%;"></td><td style="width: 50%;"></td></tr> </table> <div style="text-align: right; font-size: small; margin-top: 5px;">Click the tab key to add additional rows.</div> |  |  |
|                                                    |                                                                                                                                                                                |                                                                                                                                                                                                                                                                                                                           |  |  |
| Time frame: past 36 months                         |                                                                                                                                                                                |                                                                                                                                                                                                                                                                                                                           |  |  |
| <b>2</b>                                           | Grants or contracts from any entity (if not indicated in item #1 above).                                                                                                       | <input checked="" type="checkbox"/> <b>None</b><br><table border="1" style="width: 100%; height: 20px; margin-top: 5px;"> <tr><td style="width: 50%;"></td><td style="width: 50%;"></td></tr> </table>                                                                                                                    |  |  |
|                                                    |                                                                                                                                                                                |                                                                                                                                                                                                                                                                                                                           |  |  |
| <b>3</b>                                           | Royalties or licenses                                                                                                                                                          | <input checked="" type="checkbox"/> <b>None</b><br><table border="1" style="width: 100%; height: 20px; margin-top: 5px;"> <tr><td style="width: 50%;"></td><td style="width: 50%;"></td></tr> </table>                                                                                                                    |  |  |
|                                                    |                                                                                                                                                                                |                                                                                                                                                                                                                                                                                                                           |  |  |

|    |                                                                                                              | Name all entities with whom you have this relationship or indicate none (add rows as needed) | Specifications/Comments (e.g., if payments were made to you or to your institution)                                                         |  |  |  |  |  |  |  |  |
|----|--------------------------------------------------------------------------------------------------------------|----------------------------------------------------------------------------------------------|---------------------------------------------------------------------------------------------------------------------------------------------|--|--|--|--|--|--|--|--|
| 4  | Consulting fees                                                                                              | <input checked="" type="checkbox"/> None                                                     |                                                                                                                                             |  |  |  |  |  |  |  |  |
| 5  | Payment or honoraria for lectures, presentations, speakers bureaus, manuscript writing or educational events | <input checked="" type="checkbox"/> None                                                     | <table border="1"> <tr><td></td><td></td></tr> <tr><td></td><td></td></tr> <tr><td></td><td></td></tr> <tr><td></td><td></td></tr> </table> |  |  |  |  |  |  |  |  |
|    |                                                                                                              |                                                                                              |                                                                                                                                             |  |  |  |  |  |  |  |  |
|    |                                                                                                              |                                                                                              |                                                                                                                                             |  |  |  |  |  |  |  |  |
|    |                                                                                                              |                                                                                              |                                                                                                                                             |  |  |  |  |  |  |  |  |
|    |                                                                                                              |                                                                                              |                                                                                                                                             |  |  |  |  |  |  |  |  |
| 6  | Payment for expert testimony                                                                                 | <input checked="" type="checkbox"/> None                                                     | <table border="1"> <tr><td></td><td></td></tr> <tr><td></td><td></td></tr> <tr><td></td><td></td></tr> </table>                             |  |  |  |  |  |  |  |  |
|    |                                                                                                              |                                                                                              |                                                                                                                                             |  |  |  |  |  |  |  |  |
|    |                                                                                                              |                                                                                              |                                                                                                                                             |  |  |  |  |  |  |  |  |
|    |                                                                                                              |                                                                                              |                                                                                                                                             |  |  |  |  |  |  |  |  |
| 7  | Support for attending meetings and/or travel                                                                 | <input checked="" type="checkbox"/> None                                                     |                                                                                                                                             |  |  |  |  |  |  |  |  |
| 8  | Patents planned, issued or pending                                                                           | <input checked="" type="checkbox"/> None                                                     | <table border="1"> <tr><td></td><td></td></tr> <tr><td></td><td></td></tr> <tr><td></td><td></td></tr> </table>                             |  |  |  |  |  |  |  |  |
|    |                                                                                                              |                                                                                              |                                                                                                                                             |  |  |  |  |  |  |  |  |
|    |                                                                                                              |                                                                                              |                                                                                                                                             |  |  |  |  |  |  |  |  |
|    |                                                                                                              |                                                                                              |                                                                                                                                             |  |  |  |  |  |  |  |  |
| 9  | Participation on a Data Safety Monitoring Board or Advisory Board                                            | <input checked="" type="checkbox"/> None                                                     | <table border="1"> <tr><td></td><td></td></tr> <tr><td></td><td></td></tr> <tr><td></td><td></td></tr> </table>                             |  |  |  |  |  |  |  |  |
|    |                                                                                                              |                                                                                              |                                                                                                                                             |  |  |  |  |  |  |  |  |
|    |                                                                                                              |                                                                                              |                                                                                                                                             |  |  |  |  |  |  |  |  |
|    |                                                                                                              |                                                                                              |                                                                                                                                             |  |  |  |  |  |  |  |  |
| 10 | Leadership or fiduciary role in other board, society, committee or advocacy group, paid or unpaid            | <input checked="" type="checkbox"/> None                                                     | <table border="1"> <tr><td></td><td></td></tr> <tr><td></td><td></td></tr> <tr><td></td><td></td></tr> </table>                             |  |  |  |  |  |  |  |  |
|    |                                                                                                              |                                                                                              |                                                                                                                                             |  |  |  |  |  |  |  |  |
|    |                                                                                                              |                                                                                              |                                                                                                                                             |  |  |  |  |  |  |  |  |
|    |                                                                                                              |                                                                                              |                                                                                                                                             |  |  |  |  |  |  |  |  |

|           |                                                                                  | Name all entities with whom you have this relationship or indicate none (add rows as needed) | Specifications/Comments (e.g., if payments were made to you or to your institution) |
|-----------|----------------------------------------------------------------------------------|----------------------------------------------------------------------------------------------|-------------------------------------------------------------------------------------|
| <b>11</b> | Stock or stock options                                                           | <input checked="" type="checkbox"/> <b>None</b>                                              |                                                                                     |
|           |                                                                                  |                                                                                              |                                                                                     |
|           |                                                                                  |                                                                                              |                                                                                     |
| <b>12</b> | Receipt of equipment, materials, drugs, medical writing, gifts or other services | <input checked="" type="checkbox"/> <b>None</b>                                              |                                                                                     |
|           |                                                                                  |                                                                                              |                                                                                     |
|           |                                                                                  |                                                                                              |                                                                                     |
| <b>13</b> | Other financial or non-financial interests                                       | <input type="checkbox"/> <b>None</b>                                                         |                                                                                     |
|           |                                                                                  | Marc R. Theoret is employed by the US FDA.                                                   |                                                                                     |
|           |                                                                                  |                                                                                              |                                                                                     |

Please place an "X" next to the following statement to indicate your agreement:

I certify that I have answered every question and have not altered the wording of any of the questions on this form.

## ICMJE DISCLOSURE FORM

**Date:** 3/24/2023

**Your Name:** Pallavi Mishra-Kalyani

**Manuscript Title:** Association between antibiotic therapy and adverse oncological outcomes from targeted and immune-based therapy in hepatocellular carcinoma.

**Manuscript Number (if known):** JHEPR-D-23-00072-R1

In the interest of transparency, we ask you to disclose all relationships/activities/interests listed below that are related to the content of your manuscript. "Related" means any relation with for-profit or not-for-profit third parties whose interests may be affected by the content of the manuscript. Disclosure represents a commitment to transparency and does not necessarily indicate a bias. If you are in doubt about whether to list a relationship/activity/interest, it is preferable that you do so.

The author's relationships/activities/interests should be defined broadly. For example, if your manuscript pertains to the epidemiology of hypertension, you should declare all relationships with manufacturers of antihypertensive medication, even if that medication is not mentioned in the manuscript.

In item #1 below, report all support for the work reported in this manuscript without time limit. For all other items, the time frame for disclosure is the past 36 months.

|                                                    | Name all entities with whom you have this relationship or indicate none (add rows as needed)                                                                                   | Specifications/Comments (e.g., if payments were made to you or to your institution)                                                                                                                                                                                                                                       |  |  |
|----------------------------------------------------|--------------------------------------------------------------------------------------------------------------------------------------------------------------------------------|---------------------------------------------------------------------------------------------------------------------------------------------------------------------------------------------------------------------------------------------------------------------------------------------------------------------------|--|--|
| Time frame: Since the initial planning of the work |                                                                                                                                                                                |                                                                                                                                                                                                                                                                                                                           |  |  |
| <b>1</b>                                           | All support for the present manuscript (e.g., funding, provision of study materials, medical writing, article processing charges, etc.)<br><b>No time limit for this item.</b> | <input checked="" type="checkbox"/> <b>None</b><br><table border="1" style="width: 100%; height: 20px; margin-top: 5px;"> <tr><td style="width: 50%;"></td><td style="width: 50%;"></td></tr> </table> <div style="text-align: right; font-size: small; margin-top: 5px;">Click the tab key to add additional rows.</div> |  |  |
|                                                    |                                                                                                                                                                                |                                                                                                                                                                                                                                                                                                                           |  |  |
| Time frame: past 36 months                         |                                                                                                                                                                                |                                                                                                                                                                                                                                                                                                                           |  |  |
| <b>2</b>                                           | Grants or contracts from any entity (if not indicated in item #1 above).                                                                                                       | <input checked="" type="checkbox"/> <b>None</b><br><table border="1" style="width: 100%; height: 20px; margin-top: 5px;"> <tr><td style="width: 50%;"></td><td style="width: 50%;"></td></tr> </table>                                                                                                                    |  |  |
|                                                    |                                                                                                                                                                                |                                                                                                                                                                                                                                                                                                                           |  |  |
| <b>3</b>                                           | Royalties or licenses                                                                                                                                                          | <input checked="" type="checkbox"/> <b>None</b><br><table border="1" style="width: 100%; height: 20px; margin-top: 5px;"> <tr><td style="width: 50%;"></td><td style="width: 50%;"></td></tr> </table>                                                                                                                    |  |  |
|                                                    |                                                                                                                                                                                |                                                                                                                                                                                                                                                                                                                           |  |  |

|    |                                                                                                              | Name all entities with whom you have this relationship or indicate none (add rows as needed) | Specifications/Comments (e.g., if payments were made to you or to your institution)                                                         |  |  |  |  |  |  |  |  |
|----|--------------------------------------------------------------------------------------------------------------|----------------------------------------------------------------------------------------------|---------------------------------------------------------------------------------------------------------------------------------------------|--|--|--|--|--|--|--|--|
| 4  | Consulting fees                                                                                              | <input checked="" type="checkbox"/> None                                                     |                                                                                                                                             |  |  |  |  |  |  |  |  |
| 5  | Payment or honoraria for lectures, presentations, speakers bureaus, manuscript writing or educational events | <input checked="" type="checkbox"/> None                                                     | <table border="1"> <tr><td></td><td></td></tr> <tr><td></td><td></td></tr> <tr><td></td><td></td></tr> <tr><td></td><td></td></tr> </table> |  |  |  |  |  |  |  |  |
|    |                                                                                                              |                                                                                              |                                                                                                                                             |  |  |  |  |  |  |  |  |
|    |                                                                                                              |                                                                                              |                                                                                                                                             |  |  |  |  |  |  |  |  |
|    |                                                                                                              |                                                                                              |                                                                                                                                             |  |  |  |  |  |  |  |  |
|    |                                                                                                              |                                                                                              |                                                                                                                                             |  |  |  |  |  |  |  |  |
| 6  | Payment for expert testimony                                                                                 | <input checked="" type="checkbox"/> None                                                     | <table border="1"> <tr><td></td><td></td></tr> <tr><td></td><td></td></tr> <tr><td></td><td></td></tr> </table>                             |  |  |  |  |  |  |  |  |
|    |                                                                                                              |                                                                                              |                                                                                                                                             |  |  |  |  |  |  |  |  |
|    |                                                                                                              |                                                                                              |                                                                                                                                             |  |  |  |  |  |  |  |  |
|    |                                                                                                              |                                                                                              |                                                                                                                                             |  |  |  |  |  |  |  |  |
| 7  | Support for attending meetings and/or travel                                                                 | <input checked="" type="checkbox"/> None                                                     |                                                                                                                                             |  |  |  |  |  |  |  |  |
| 8  | Patents planned, issued or pending                                                                           | <input checked="" type="checkbox"/> None                                                     | <table border="1"> <tr><td></td><td></td></tr> <tr><td></td><td></td></tr> <tr><td></td><td></td></tr> </table>                             |  |  |  |  |  |  |  |  |
|    |                                                                                                              |                                                                                              |                                                                                                                                             |  |  |  |  |  |  |  |  |
|    |                                                                                                              |                                                                                              |                                                                                                                                             |  |  |  |  |  |  |  |  |
|    |                                                                                                              |                                                                                              |                                                                                                                                             |  |  |  |  |  |  |  |  |
| 9  | Participation on a Data Safety Monitoring Board or Advisory Board                                            | <input checked="" type="checkbox"/> None                                                     | <table border="1"> <tr><td></td><td></td></tr> <tr><td></td><td></td></tr> <tr><td></td><td></td></tr> </table>                             |  |  |  |  |  |  |  |  |
|    |                                                                                                              |                                                                                              |                                                                                                                                             |  |  |  |  |  |  |  |  |
|    |                                                                                                              |                                                                                              |                                                                                                                                             |  |  |  |  |  |  |  |  |
|    |                                                                                                              |                                                                                              |                                                                                                                                             |  |  |  |  |  |  |  |  |
| 10 | Leadership or fiduciary role in other board, society, committee or advocacy group, paid or unpaid            | <input checked="" type="checkbox"/> None                                                     | <table border="1"> <tr><td></td><td></td></tr> <tr><td></td><td></td></tr> <tr><td></td><td></td></tr> </table>                             |  |  |  |  |  |  |  |  |
|    |                                                                                                              |                                                                                              |                                                                                                                                             |  |  |  |  |  |  |  |  |
|    |                                                                                                              |                                                                                              |                                                                                                                                             |  |  |  |  |  |  |  |  |
|    |                                                                                                              |                                                                                              |                                                                                                                                             |  |  |  |  |  |  |  |  |

|           |                                                                                  | Name all entities with whom you have this relationship or indicate none (add rows as needed) | Specifications/Comments (e.g., if payments were made to you or to your institution) |
|-----------|----------------------------------------------------------------------------------|----------------------------------------------------------------------------------------------|-------------------------------------------------------------------------------------|
| <b>11</b> | Stock or stock options                                                           | <input checked="" type="checkbox"/> <b>None</b>                                              |                                                                                     |
|           |                                                                                  |                                                                                              |                                                                                     |
|           |                                                                                  |                                                                                              |                                                                                     |
| <b>12</b> | Receipt of equipment, materials, drugs, medical writing, gifts or other services | <input checked="" type="checkbox"/> <b>None</b>                                              |                                                                                     |
|           |                                                                                  |                                                                                              |                                                                                     |
|           |                                                                                  |                                                                                              |                                                                                     |
| <b>13</b> | Other financial or non-financial interests                                       | <input type="checkbox"/> <b>None</b>                                                         |                                                                                     |
|           |                                                                                  | Pallavi Mishra-Kalyani is employed by the US FDA.                                            |                                                                                     |
|           |                                                                                  |                                                                                              |                                                                                     |

Please place an "X" next to the following statement to indicate your agreement:

I certify that I have answered every question and have not altered the wording of any of the questions on this form.

## ICMJE DISCLOSURE FORM

**Date:** 2/23/2023

**Your Name:** David J Pinato

**Manuscript Title:** Association between antibiotic therapy and adverse oncological outcomes from targeted and immune-based therapy in hepatocellular carcinoma.

**Manuscript Number (if known):** JHEPR-D-23-00072-R1

In the interest of transparency, we ask you to disclose all relationships/activities/interests listed below that are related to the content of your manuscript. "Related" means any relation with for-profit or not-for-profit third parties whose interests may be affected by the content of the manuscript. Disclosure represents a commitment to transparency and does not necessarily indicate a bias. If you are in doubt about whether to list a relationship/activity/interest, it is preferable that you do so.

The author's relationships/activities/interests should be defined broadly. For example, if your manuscript pertains to the epidemiology of hypertension, you should declare all relationships with manufacturers of antihypertensive medication, even if that medication is not mentioned in the manuscript.

In item #1 below, report all support for the work reported in this manuscript without time limit. For all other items, the time frame for disclosure is the past 36 months.

|                                                    | Name all entities with whom you have this relationship or indicate none (add rows as needed)                                                                                   | Specifications/Comments (e.g., if payments were made to you or to your institution)                                                                                                                                                                                                                                                                                                                                                                                                                                                                                        |
|----------------------------------------------------|--------------------------------------------------------------------------------------------------------------------------------------------------------------------------------|----------------------------------------------------------------------------------------------------------------------------------------------------------------------------------------------------------------------------------------------------------------------------------------------------------------------------------------------------------------------------------------------------------------------------------------------------------------------------------------------------------------------------------------------------------------------------|
| Time frame: Since the initial planning of the work |                                                                                                                                                                                |                                                                                                                                                                                                                                                                                                                                                                                                                                                                                                                                                                            |
| 1                                                  | All support for the present manuscript (e.g., funding, provision of study materials, medical writing, article processing charges, etc.)<br><b>No time limit for this item.</b> | <input type="checkbox"/> None<br><br><div style="border: 1px solid black; padding: 5px; min-height: 100px;">           David James Pinato is supported by grant funding from ASCO/Conquer Cancer Foundation Global Oncology Young Investigator Award 2019 (14704), the Wellcome Trust Strategic Fund (PS3416), Cancer Research UK (C57701/A26137)         </div> <div style="text-align: right; font-size: small; color: #ccc; margin-top: 5px;">Click the tab key to add additional rows.</div>                                                                           |
| Time frame: past 36 months                         |                                                                                                                                                                                |                                                                                                                                                                                                                                                                                                                                                                                                                                                                                                                                                                            |
| 2                                                  | Grants or contracts from any entity (if not indicated in item #1 above).                                                                                                       | <input type="checkbox"/> None<br><br><div style="border: 1px solid black; padding: 5px; min-height: 100px;">           David James Pinato is supported by grant funding from CW+ and the Westminster Medical School Research Trust (JRC SG 009 2018-19), the Cancer Treatment and Research Trust (CTRT) and from the Associazione Italiana per la Ricerca sul Cancro (AIRC MFAG Grant ID 25697). David James Pinato acknowledges infrastructural and grant support from the NIHR Imperial Experimental Cancer Medicine Centre and the Imperial College BRC.         </div> |

|   |                                                                                                              | Name all entities with whom you have this relationship or indicate none (add rows as needed)                                                                        | Specifications/Comments (e.g., if payments were made to you or to your institution) |
|---|--------------------------------------------------------------------------------------------------------------|---------------------------------------------------------------------------------------------------------------------------------------------------------------------|-------------------------------------------------------------------------------------|
| 3 | Royalties or licenses                                                                                        | <input checked="" type="checkbox"/> <b>None</b>                                                                                                                     |                                                                                     |
|   |                                                                                                              |                                                                                                                                                                     |                                                                                     |
|   |                                                                                                              |                                                                                                                                                                     |                                                                                     |
|   |                                                                                                              |                                                                                                                                                                     |                                                                                     |
| 4 | Consulting fees                                                                                              | <input type="checkbox"/> <b>None</b>                                                                                                                                |                                                                                     |
|   |                                                                                                              | David James Pinato received consulting fees for Mina Therapeutics, Eisai, Roche, DaVolterra, Mursla, LIFT Biosciences, Starpharma, Exact Sciences and Astra Zeneca. |                                                                                     |
| 5 | Payment or honoraria for lectures, presentations, speakers bureaus, manuscript writing or educational events | <input type="checkbox"/> <b>None</b>                                                                                                                                |                                                                                     |
|   |                                                                                                              | David James Pinato received lecture fees from ViiV Healthcare, Bayer Healthcare, BMS, Roche, Eisai, Falk Foundation.                                                |                                                                                     |
|   |                                                                                                              |                                                                                                                                                                     |                                                                                     |
|   |                                                                                                              |                                                                                                                                                                     |                                                                                     |
|   |                                                                                                              |                                                                                                                                                                     |                                                                                     |
| 6 | Payment for expert testimony                                                                                 | <input checked="" type="checkbox"/> <b>None</b>                                                                                                                     |                                                                                     |
|   |                                                                                                              |                                                                                                                                                                     |                                                                                     |
|   |                                                                                                              |                                                                                                                                                                     |                                                                                     |
| 7 | Support for attending meetings and/or travel                                                                 | <input type="checkbox"/> <b>None</b>                                                                                                                                |                                                                                     |
|   |                                                                                                              | David James Pinato received travel expenses from BMS and Bayer Healthcare.                                                                                          |                                                                                     |
| 8 | Patents planned, issued or pending                                                                           | <input checked="" type="checkbox"/> <b>None</b>                                                                                                                     |                                                                                     |
|   |                                                                                                              |                                                                                                                                                                     |                                                                                     |
|   |                                                                                                              |                                                                                                                                                                     |                                                                                     |
| 9 | Participation on a Data Safety Monitoring Board or Advisory Board                                            | <input checked="" type="checkbox"/> <b>None</b>                                                                                                                     |                                                                                     |
|   |                                                                                                              |                                                                                                                                                                     |                                                                                     |
|   |                                                                                                              |                                                                                                                                                                     |                                                                                     |



|                                                                                                                                                                                                                                                               |                                                                                                   | Name all entities with whom you have this relationship or indicate none (add rows as needed) | Specifications/Comments (e.g., if payments were made to you or to your institution) |
|---------------------------------------------------------------------------------------------------------------------------------------------------------------------------------------------------------------------------------------------------------------|---------------------------------------------------------------------------------------------------|----------------------------------------------------------------------------------------------|-------------------------------------------------------------------------------------|
| <b>10</b>                                                                                                                                                                                                                                                     | Leadership or fiduciary role in other board, society, committee or advocacy group, paid or unpaid | <input checked="" type="checkbox"/> <b>None</b>                                              |                                                                                     |
|                                                                                                                                                                                                                                                               |                                                                                                   |                                                                                              |                                                                                     |
|                                                                                                                                                                                                                                                               |                                                                                                   |                                                                                              |                                                                                     |
| <b>11</b>                                                                                                                                                                                                                                                     | Stock or stock options                                                                            | <input checked="" type="checkbox"/> <b>None</b>                                              |                                                                                     |
|                                                                                                                                                                                                                                                               |                                                                                                   |                                                                                              |                                                                                     |
|                                                                                                                                                                                                                                                               |                                                                                                   |                                                                                              |                                                                                     |
| <b>12</b>                                                                                                                                                                                                                                                     | Receipt of equipment, materials, drugs, medical writing, gifts or other services                  | <input checked="" type="checkbox"/> <b>None</b>                                              |                                                                                     |
|                                                                                                                                                                                                                                                               |                                                                                                   |                                                                                              |                                                                                     |
|                                                                                                                                                                                                                                                               |                                                                                                   |                                                                                              |                                                                                     |
| <b>13</b>                                                                                                                                                                                                                                                     | Other financial or non-financial interests                                                        | <input type="checkbox"/> <b>None</b>                                                         |                                                                                     |
|                                                                                                                                                                                                                                                               |                                                                                                   | David James Pinato received research funding (to institution) from MSD, GSK and BMS.         |                                                                                     |
|                                                                                                                                                                                                                                                               |                                                                                                   |                                                                                              |                                                                                     |
| <p><b>Please place an "X" next to the following statement to indicate your agreement:</b></p> <p><input checked="" type="checkbox"/> I certify that I have answered every question and have not altered the wording of any of the questions on this form.</p> |                                                                                                   |                                                                                              |                                                                                     |

## ICMJE DISCLOSURE FORM

**Date:** 3/24/2023

**Your Name:** Richard Pazdur

**Manuscript Title:** Association between antibiotic therapy and adverse oncological outcomes from targeted and immune-based therapy in hepatocellular carcinoma.

**Manuscript Number (if known):** JHEPR-D-23-00072-R1

In the interest of transparency, we ask you to disclose all relationships/activities/interests listed below that are related to the content of your manuscript. "Related" means any relation with for-profit or not-for-profit third parties whose interests may be affected by the content of the manuscript. Disclosure represents a commitment to transparency and does not necessarily indicate a bias. If you are in doubt about whether to list a relationship/activity/interest, it is preferable that you do so.

The author's relationships/activities/interests should be defined broadly. For example, if your manuscript pertains to the epidemiology of hypertension, you should declare all relationships with manufacturers of antihypertensive medication, even if that medication is not mentioned in the manuscript.

In item #1 below, report all support for the work reported in this manuscript without time limit. For all other items, the time frame for disclosure is the past 36 months.

|                                                    | Name all entities with whom you have this relationship or indicate none (add rows as needed)                                                                                   | Specifications/Comments (e.g., if payments were made to you or to your institution)                                                                                                                                                                                                                                       |  |  |
|----------------------------------------------------|--------------------------------------------------------------------------------------------------------------------------------------------------------------------------------|---------------------------------------------------------------------------------------------------------------------------------------------------------------------------------------------------------------------------------------------------------------------------------------------------------------------------|--|--|
| Time frame: Since the initial planning of the work |                                                                                                                                                                                |                                                                                                                                                                                                                                                                                                                           |  |  |
| <b>1</b>                                           | All support for the present manuscript (e.g., funding, provision of study materials, medical writing, article processing charges, etc.)<br><b>No time limit for this item.</b> | <input checked="" type="checkbox"/> <b>None</b><br><table border="1" style="width: 100%; height: 20px; margin-top: 5px;"> <tr><td style="width: 50%;"></td><td style="width: 50%;"></td></tr> </table> <div style="text-align: right; font-size: small; margin-top: 5px;">Click the tab key to add additional rows.</div> |  |  |
|                                                    |                                                                                                                                                                                |                                                                                                                                                                                                                                                                                                                           |  |  |
| Time frame: past 36 months                         |                                                                                                                                                                                |                                                                                                                                                                                                                                                                                                                           |  |  |
| <b>2</b>                                           | Grants or contracts from any entity (if not indicated in item #1 above).                                                                                                       | <input checked="" type="checkbox"/> <b>None</b><br><table border="1" style="width: 100%; height: 20px; margin-top: 5px;"> <tr><td style="width: 50%;"></td><td style="width: 50%;"></td></tr> </table>                                                                                                                    |  |  |
|                                                    |                                                                                                                                                                                |                                                                                                                                                                                                                                                                                                                           |  |  |
| <b>3</b>                                           | Royalties or licenses                                                                                                                                                          | <input checked="" type="checkbox"/> <b>None</b><br><table border="1" style="width: 100%; height: 20px; margin-top: 5px;"> <tr><td style="width: 50%;"></td><td style="width: 50%;"></td></tr> </table>                                                                                                                    |  |  |
|                                                    |                                                                                                                                                                                |                                                                                                                                                                                                                                                                                                                           |  |  |

|    |                                                                                                              | Name all entities with whom you have this relationship or indicate none (add rows as needed) | Specifications/Comments (e.g., if payments were made to you or to your institution)                                                         |  |  |  |  |  |  |  |  |
|----|--------------------------------------------------------------------------------------------------------------|----------------------------------------------------------------------------------------------|---------------------------------------------------------------------------------------------------------------------------------------------|--|--|--|--|--|--|--|--|
| 4  | Consulting fees                                                                                              | <input checked="" type="checkbox"/> None                                                     |                                                                                                                                             |  |  |  |  |  |  |  |  |
| 5  | Payment or honoraria for lectures, presentations, speakers bureaus, manuscript writing or educational events | <input checked="" type="checkbox"/> None                                                     | <table border="1"> <tr><td></td><td></td></tr> <tr><td></td><td></td></tr> <tr><td></td><td></td></tr> <tr><td></td><td></td></tr> </table> |  |  |  |  |  |  |  |  |
|    |                                                                                                              |                                                                                              |                                                                                                                                             |  |  |  |  |  |  |  |  |
|    |                                                                                                              |                                                                                              |                                                                                                                                             |  |  |  |  |  |  |  |  |
|    |                                                                                                              |                                                                                              |                                                                                                                                             |  |  |  |  |  |  |  |  |
|    |                                                                                                              |                                                                                              |                                                                                                                                             |  |  |  |  |  |  |  |  |
| 6  | Payment for expert testimony                                                                                 | <input checked="" type="checkbox"/> None                                                     | <table border="1"> <tr><td></td><td></td></tr> <tr><td></td><td></td></tr> <tr><td></td><td></td></tr> </table>                             |  |  |  |  |  |  |  |  |
|    |                                                                                                              |                                                                                              |                                                                                                                                             |  |  |  |  |  |  |  |  |
|    |                                                                                                              |                                                                                              |                                                                                                                                             |  |  |  |  |  |  |  |  |
|    |                                                                                                              |                                                                                              |                                                                                                                                             |  |  |  |  |  |  |  |  |
| 7  | Support for attending meetings and/or travel                                                                 | <input checked="" type="checkbox"/> None                                                     |                                                                                                                                             |  |  |  |  |  |  |  |  |
| 8  | Patents planned, issued or pending                                                                           | <input checked="" type="checkbox"/> None                                                     | <table border="1"> <tr><td></td><td></td></tr> <tr><td></td><td></td></tr> <tr><td></td><td></td></tr> </table>                             |  |  |  |  |  |  |  |  |
|    |                                                                                                              |                                                                                              |                                                                                                                                             |  |  |  |  |  |  |  |  |
|    |                                                                                                              |                                                                                              |                                                                                                                                             |  |  |  |  |  |  |  |  |
|    |                                                                                                              |                                                                                              |                                                                                                                                             |  |  |  |  |  |  |  |  |
| 9  | Participation on a Data Safety Monitoring Board or Advisory Board                                            | <input checked="" type="checkbox"/> None                                                     | <table border="1"> <tr><td></td><td></td></tr> <tr><td></td><td></td></tr> <tr><td></td><td></td></tr> </table>                             |  |  |  |  |  |  |  |  |
|    |                                                                                                              |                                                                                              |                                                                                                                                             |  |  |  |  |  |  |  |  |
|    |                                                                                                              |                                                                                              |                                                                                                                                             |  |  |  |  |  |  |  |  |
|    |                                                                                                              |                                                                                              |                                                                                                                                             |  |  |  |  |  |  |  |  |
| 10 | Leadership or fiduciary role in other board, society, committee or advocacy group, paid or unpaid            | <input checked="" type="checkbox"/> None                                                     | <table border="1"> <tr><td></td><td></td></tr> <tr><td></td><td></td></tr> <tr><td></td><td></td></tr> </table>                             |  |  |  |  |  |  |  |  |
|    |                                                                                                              |                                                                                              |                                                                                                                                             |  |  |  |  |  |  |  |  |
|    |                                                                                                              |                                                                                              |                                                                                                                                             |  |  |  |  |  |  |  |  |
|    |                                                                                                              |                                                                                              |                                                                                                                                             |  |  |  |  |  |  |  |  |

|           |                                                                                  | Name all entities with whom you have this relationship or indicate none (add rows as needed) | Specifications/Comments (e.g., if payments were made to you or to your institution) |
|-----------|----------------------------------------------------------------------------------|----------------------------------------------------------------------------------------------|-------------------------------------------------------------------------------------|
| <b>11</b> | Stock or stock options                                                           | <input checked="" type="checkbox"/> <b>None</b>                                              |                                                                                     |
|           |                                                                                  |                                                                                              |                                                                                     |
|           |                                                                                  |                                                                                              |                                                                                     |
| <b>12</b> | Receipt of equipment, materials, drugs, medical writing, gifts or other services | <input checked="" type="checkbox"/> <b>None</b>                                              |                                                                                     |
|           |                                                                                  |                                                                                              |                                                                                     |
|           |                                                                                  |                                                                                              |                                                                                     |
| <b>13</b> | Other financial or non-financial interests                                       | <input type="checkbox"/> <b>None</b>                                                         |                                                                                     |
|           |                                                                                  | Richard Pazdur is employed by the US FDA.                                                    |                                                                                     |
|           |                                                                                  |                                                                                              |                                                                                     |

**Please place an "X" next to the following statement to indicate your agreement:**

I certify that I have answered every question and have not altered the wording of any of the questions on this form.

## ICMJE DISCLOSURE FORM

**Date:** 3/24/2023

**Your Name:** Sandra Casak

**Manuscript Title:** Association between antibiotic therapy and adverse oncological outcomes from targeted and immune-based therapy in hepatocellular carcinoma.

**Manuscript Number (if known):** JHEPR-D-23-00072-R1

In the interest of transparency, we ask you to disclose all relationships/activities/interests listed below that are related to the content of your manuscript. "Related" means any relation with for-profit or not-for-profit third parties whose interests may be affected by the content of the manuscript. Disclosure represents a commitment to transparency and does not necessarily indicate a bias. If you are in doubt about whether to list a relationship/activity/interest, it is preferable that you do so.

The author's relationships/activities/interests should be defined broadly. For example, if your manuscript pertains to the epidemiology of hypertension, you should declare all relationships with manufacturers of antihypertensive medication, even if that medication is not mentioned in the manuscript.

In item #1 below, report all support for the work reported in this manuscript without time limit. For all other items, the time frame for disclosure is the past 36 months.

|                                                           |                                                                                                                                                                                | Name all entities with whom you have this relationship or indicate none (add rows as needed)                                                                                                           | Specifications/Comments (e.g., if payments were made to you or to your institution) |  |                                                                                                                                                                                                                   |  |                                           |
|-----------------------------------------------------------|--------------------------------------------------------------------------------------------------------------------------------------------------------------------------------|--------------------------------------------------------------------------------------------------------------------------------------------------------------------------------------------------------|-------------------------------------------------------------------------------------|--|-------------------------------------------------------------------------------------------------------------------------------------------------------------------------------------------------------------------|--|-------------------------------------------|
| <b>Time frame: Since the initial planning of the work</b> |                                                                                                                                                                                |                                                                                                                                                                                                        |                                                                                     |  |                                                                                                                                                                                                                   |  |                                           |
| <b>1</b>                                                  | All support for the present manuscript (e.g., funding, provision of study materials, medical writing, article processing charges, etc.)<br><b>No time limit for this item.</b> | <input checked="" type="checkbox"/> <b>None</b><br><table border="1" style="width: 100%; height: 20px; margin-top: 5px;"> <tr><td style="width: 50%;"></td><td style="width: 50%;"></td></tr> </table> |                                                                                     |  | <table border="1" style="width: 100%; height: 20px;"> <tr><td style="width: 50%;"></td><td style="width: 50%; text-align: center; font-size: small;">Click the tab key to add additional rows.</td></tr> </table> |  | Click the tab key to add additional rows. |
|                                                           |                                                                                                                                                                                |                                                                                                                                                                                                        |                                                                                     |  |                                                                                                                                                                                                                   |  |                                           |
|                                                           | Click the tab key to add additional rows.                                                                                                                                      |                                                                                                                                                                                                        |                                                                                     |  |                                                                                                                                                                                                                   |  |                                           |
| <b>Time frame: past 36 months</b>                         |                                                                                                                                                                                |                                                                                                                                                                                                        |                                                                                     |  |                                                                                                                                                                                                                   |  |                                           |
| <b>2</b>                                                  | Grants or contracts from any entity (if not indicated in item #1 above).                                                                                                       | <input checked="" type="checkbox"/> <b>None</b><br><table border="1" style="width: 100%; height: 20px; margin-top: 5px;"> <tr><td style="width: 50%;"></td><td style="width: 50%;"></td></tr> </table> |                                                                                     |  |                                                                                                                                                                                                                   |  |                                           |
|                                                           |                                                                                                                                                                                |                                                                                                                                                                                                        |                                                                                     |  |                                                                                                                                                                                                                   |  |                                           |
| <b>3</b>                                                  | Royalties or licenses                                                                                                                                                          | <input checked="" type="checkbox"/> <b>None</b><br><table border="1" style="width: 100%; height: 20px; margin-top: 5px;"> <tr><td style="width: 50%;"></td><td style="width: 50%;"></td></tr> </table> |                                                                                     |  |                                                                                                                                                                                                                   |  |                                           |
|                                                           |                                                                                                                                                                                |                                                                                                                                                                                                        |                                                                                     |  |                                                                                                                                                                                                                   |  |                                           |

|    |                                                                                                              | Name all entities with whom you have this relationship or indicate none (add rows as needed) | Specifications/Comments (e.g., if payments were made to you or to your institution)                                                         |  |  |  |  |  |  |  |  |
|----|--------------------------------------------------------------------------------------------------------------|----------------------------------------------------------------------------------------------|---------------------------------------------------------------------------------------------------------------------------------------------|--|--|--|--|--|--|--|--|
| 4  | Consulting fees                                                                                              | <input checked="" type="checkbox"/> None                                                     |                                                                                                                                             |  |  |  |  |  |  |  |  |
| 5  | Payment or honoraria for lectures, presentations, speakers bureaus, manuscript writing or educational events | <input checked="" type="checkbox"/> None                                                     | <table border="1"> <tr><td></td><td></td></tr> <tr><td></td><td></td></tr> <tr><td></td><td></td></tr> <tr><td></td><td></td></tr> </table> |  |  |  |  |  |  |  |  |
|    |                                                                                                              |                                                                                              |                                                                                                                                             |  |  |  |  |  |  |  |  |
|    |                                                                                                              |                                                                                              |                                                                                                                                             |  |  |  |  |  |  |  |  |
|    |                                                                                                              |                                                                                              |                                                                                                                                             |  |  |  |  |  |  |  |  |
|    |                                                                                                              |                                                                                              |                                                                                                                                             |  |  |  |  |  |  |  |  |
| 6  | Payment for expert testimony                                                                                 | <input checked="" type="checkbox"/> None                                                     | <table border="1"> <tr><td></td><td></td></tr> <tr><td></td><td></td></tr> <tr><td></td><td></td></tr> </table>                             |  |  |  |  |  |  |  |  |
|    |                                                                                                              |                                                                                              |                                                                                                                                             |  |  |  |  |  |  |  |  |
|    |                                                                                                              |                                                                                              |                                                                                                                                             |  |  |  |  |  |  |  |  |
|    |                                                                                                              |                                                                                              |                                                                                                                                             |  |  |  |  |  |  |  |  |
| 7  | Support for attending meetings and/or travel                                                                 | <input checked="" type="checkbox"/> None                                                     |                                                                                                                                             |  |  |  |  |  |  |  |  |
| 8  | Patents planned, issued or pending                                                                           | <input checked="" type="checkbox"/> None                                                     | <table border="1"> <tr><td></td><td></td></tr> <tr><td></td><td></td></tr> <tr><td></td><td></td></tr> </table>                             |  |  |  |  |  |  |  |  |
|    |                                                                                                              |                                                                                              |                                                                                                                                             |  |  |  |  |  |  |  |  |
|    |                                                                                                              |                                                                                              |                                                                                                                                             |  |  |  |  |  |  |  |  |
|    |                                                                                                              |                                                                                              |                                                                                                                                             |  |  |  |  |  |  |  |  |
| 9  | Participation on a Data Safety Monitoring Board or Advisory Board                                            | <input checked="" type="checkbox"/> None                                                     | <table border="1"> <tr><td></td><td></td></tr> <tr><td></td><td></td></tr> <tr><td></td><td></td></tr> </table>                             |  |  |  |  |  |  |  |  |
|    |                                                                                                              |                                                                                              |                                                                                                                                             |  |  |  |  |  |  |  |  |
|    |                                                                                                              |                                                                                              |                                                                                                                                             |  |  |  |  |  |  |  |  |
|    |                                                                                                              |                                                                                              |                                                                                                                                             |  |  |  |  |  |  |  |  |
| 10 | Leadership or fiduciary role in other board, society, committee or advocacy group, paid or unpaid            | <input checked="" type="checkbox"/> None                                                     | <table border="1"> <tr><td></td><td></td></tr> <tr><td></td><td></td></tr> <tr><td></td><td></td></tr> </table>                             |  |  |  |  |  |  |  |  |
|    |                                                                                                              |                                                                                              |                                                                                                                                             |  |  |  |  |  |  |  |  |
|    |                                                                                                              |                                                                                              |                                                                                                                                             |  |  |  |  |  |  |  |  |
|    |                                                                                                              |                                                                                              |                                                                                                                                             |  |  |  |  |  |  |  |  |

|           |                                                                                  | Name all entities with whom you have this relationship or indicate none (add rows as needed) | Specifications/Comments (e.g., if payments were made to you or to your institution) |
|-----------|----------------------------------------------------------------------------------|----------------------------------------------------------------------------------------------|-------------------------------------------------------------------------------------|
| <b>11</b> | Stock or stock options                                                           | <input checked="" type="checkbox"/> <b>None</b>                                              |                                                                                     |
|           |                                                                                  |                                                                                              |                                                                                     |
|           |                                                                                  |                                                                                              |                                                                                     |
| <b>12</b> | Receipt of equipment, materials, drugs, medical writing, gifts or other services | <input checked="" type="checkbox"/> <b>None</b>                                              |                                                                                     |
|           |                                                                                  |                                                                                              |                                                                                     |
|           |                                                                                  |                                                                                              |                                                                                     |
| <b>13</b> | Other financial or non-financial interests                                       | <input type="checkbox"/> <b>None</b>                                                         |                                                                                     |
|           |                                                                                  | Sandra Casak is employed by the US FDA.                                                      |                                                                                     |
|           |                                                                                  |                                                                                              |                                                                                     |

Please place an "X" next to the following statement to indicate your agreement:

I certify that I have answered every question and have not altered the wording of any of the questions on this form.

## ICMJE DISCLOSURE FORM

**Date:** 3/24/2023

**Your Name:** Steven Lemery

**Manuscript Title:** Association between antibiotic therapy and adverse oncological outcomes from targeted and immune-based therapy in hepatocellular carcinoma.

**Manuscript Number (if known):** JHEPR-D-23-00072-R1

In the interest of transparency, we ask you to disclose all relationships/activities/interests listed below that are related to the content of your manuscript. "Related" means any relation with for-profit or not-for-profit third parties whose interests may be affected by the content of the manuscript. Disclosure represents a commitment to transparency and does not necessarily indicate a bias. If you are in doubt about whether to list a relationship/activity/interest, it is preferable that you do so.

The author's relationships/activities/interests should be defined broadly. For example, if your manuscript pertains to the epidemiology of hypertension, you should declare all relationships with manufacturers of antihypertensive medication, even if that medication is not mentioned in the manuscript.

In item #1 below, report all support for the work reported in this manuscript without time limit. For all other items, the time frame for disclosure is the past 36 months.

|                                                    | Name all entities with whom you have this relationship or indicate none (add rows as needed)                                                                                   | Specifications/Comments (e.g., if payments were made to you or to your institution)                                                                                                                                                                                                                                       |  |  |
|----------------------------------------------------|--------------------------------------------------------------------------------------------------------------------------------------------------------------------------------|---------------------------------------------------------------------------------------------------------------------------------------------------------------------------------------------------------------------------------------------------------------------------------------------------------------------------|--|--|
| Time frame: Since the initial planning of the work |                                                                                                                                                                                |                                                                                                                                                                                                                                                                                                                           |  |  |
| <b>1</b>                                           | All support for the present manuscript (e.g., funding, provision of study materials, medical writing, article processing charges, etc.)<br><b>No time limit for this item.</b> | <input checked="" type="checkbox"/> <b>None</b><br><table border="1" style="width: 100%; height: 20px; margin-top: 5px;"> <tr><td style="width: 50%;"></td><td style="width: 50%;"></td></tr> </table> <div style="text-align: right; font-size: small; margin-top: 5px;">Click the tab key to add additional rows.</div> |  |  |
|                                                    |                                                                                                                                                                                |                                                                                                                                                                                                                                                                                                                           |  |  |
| Time frame: past 36 months                         |                                                                                                                                                                                |                                                                                                                                                                                                                                                                                                                           |  |  |
| <b>2</b>                                           | Grants or contracts from any entity (if not indicated in item #1 above).                                                                                                       | <input checked="" type="checkbox"/> <b>None</b><br><table border="1" style="width: 100%; height: 20px; margin-top: 5px;"> <tr><td style="width: 50%;"></td><td style="width: 50%;"></td></tr> </table>                                                                                                                    |  |  |
|                                                    |                                                                                                                                                                                |                                                                                                                                                                                                                                                                                                                           |  |  |
| <b>3</b>                                           | Royalties or licenses                                                                                                                                                          | <input checked="" type="checkbox"/> <b>None</b><br><table border="1" style="width: 100%; height: 20px; margin-top: 5px;"> <tr><td style="width: 50%;"></td><td style="width: 50%;"></td></tr> </table>                                                                                                                    |  |  |
|                                                    |                                                                                                                                                                                |                                                                                                                                                                                                                                                                                                                           |  |  |



|    |                                                                                                              | Name all entities with whom you have this relationship or indicate none (add rows as needed) | Specifications/Comments (e.g., if payments were made to you or to your institution)                                                         |  |  |  |  |  |  |  |  |
|----|--------------------------------------------------------------------------------------------------------------|----------------------------------------------------------------------------------------------|---------------------------------------------------------------------------------------------------------------------------------------------|--|--|--|--|--|--|--|--|
| 4  | Consulting fees                                                                                              | <input checked="" type="checkbox"/> None                                                     |                                                                                                                                             |  |  |  |  |  |  |  |  |
| 5  | Payment or honoraria for lectures, presentations, speakers bureaus, manuscript writing or educational events | <input checked="" type="checkbox"/> None                                                     | <table border="1"> <tr><td></td><td></td></tr> <tr><td></td><td></td></tr> <tr><td></td><td></td></tr> <tr><td></td><td></td></tr> </table> |  |  |  |  |  |  |  |  |
|    |                                                                                                              |                                                                                              |                                                                                                                                             |  |  |  |  |  |  |  |  |
|    |                                                                                                              |                                                                                              |                                                                                                                                             |  |  |  |  |  |  |  |  |
|    |                                                                                                              |                                                                                              |                                                                                                                                             |  |  |  |  |  |  |  |  |
|    |                                                                                                              |                                                                                              |                                                                                                                                             |  |  |  |  |  |  |  |  |
| 6  | Payment for expert testimony                                                                                 | <input checked="" type="checkbox"/> None                                                     | <table border="1"> <tr><td></td><td></td></tr> <tr><td></td><td></td></tr> <tr><td></td><td></td></tr> </table>                             |  |  |  |  |  |  |  |  |
|    |                                                                                                              |                                                                                              |                                                                                                                                             |  |  |  |  |  |  |  |  |
|    |                                                                                                              |                                                                                              |                                                                                                                                             |  |  |  |  |  |  |  |  |
|    |                                                                                                              |                                                                                              |                                                                                                                                             |  |  |  |  |  |  |  |  |
| 7  | Support for attending meetings and/or travel                                                                 | <input checked="" type="checkbox"/> None                                                     |                                                                                                                                             |  |  |  |  |  |  |  |  |
| 8  | Patents planned, issued or pending                                                                           | <input checked="" type="checkbox"/> None                                                     | <table border="1"> <tr><td></td><td></td></tr> <tr><td></td><td></td></tr> <tr><td></td><td></td></tr> </table>                             |  |  |  |  |  |  |  |  |
|    |                                                                                                              |                                                                                              |                                                                                                                                             |  |  |  |  |  |  |  |  |
|    |                                                                                                              |                                                                                              |                                                                                                                                             |  |  |  |  |  |  |  |  |
|    |                                                                                                              |                                                                                              |                                                                                                                                             |  |  |  |  |  |  |  |  |
| 9  | Participation on a Data Safety Monitoring Board or Advisory Board                                            | <input checked="" type="checkbox"/> None                                                     | <table border="1"> <tr><td></td><td></td></tr> <tr><td></td><td></td></tr> <tr><td></td><td></td></tr> </table>                             |  |  |  |  |  |  |  |  |
|    |                                                                                                              |                                                                                              |                                                                                                                                             |  |  |  |  |  |  |  |  |
|    |                                                                                                              |                                                                                              |                                                                                                                                             |  |  |  |  |  |  |  |  |
|    |                                                                                                              |                                                                                              |                                                                                                                                             |  |  |  |  |  |  |  |  |
| 10 | Leadership or fiduciary role in other board, society, committee or advocacy group, paid or unpaid            | <input checked="" type="checkbox"/> None                                                     | <table border="1"> <tr><td></td><td></td></tr> <tr><td></td><td></td></tr> <tr><td></td><td></td></tr> </table>                             |  |  |  |  |  |  |  |  |
|    |                                                                                                              |                                                                                              |                                                                                                                                             |  |  |  |  |  |  |  |  |
|    |                                                                                                              |                                                                                              |                                                                                                                                             |  |  |  |  |  |  |  |  |
|    |                                                                                                              |                                                                                              |                                                                                                                                             |  |  |  |  |  |  |  |  |

|                                          |                                                                                  | Name all entities with whom you have this relationship or indicate none (add rows as needed)                                                                                                                                                                                                                         | Specifications/Comments (e.g., if payments were made to you or to your institution) |  |  |  |  |  |  |
|------------------------------------------|----------------------------------------------------------------------------------|----------------------------------------------------------------------------------------------------------------------------------------------------------------------------------------------------------------------------------------------------------------------------------------------------------------------|-------------------------------------------------------------------------------------|--|--|--|--|--|--|
| <b>11</b>                                | Stock or stock options                                                           | <input checked="" type="checkbox"/> <b>None</b><br><table border="1" style="width: 100%; border-collapse: collapse;"> <tr><td style="width: 50%; height: 15px;"></td><td style="width: 50%;"></td></tr> <tr><td style="height: 15px;"></td><td></td></tr> <tr><td style="height: 15px;"></td><td></td></tr> </table> |                                                                                     |  |  |  |  |  |  |
|                                          |                                                                                  |                                                                                                                                                                                                                                                                                                                      |                                                                                     |  |  |  |  |  |  |
|                                          |                                                                                  |                                                                                                                                                                                                                                                                                                                      |                                                                                     |  |  |  |  |  |  |
|                                          |                                                                                  |                                                                                                                                                                                                                                                                                                                      |                                                                                     |  |  |  |  |  |  |
| <b>12</b>                                | Receipt of equipment, materials, drugs, medical writing, gifts or other services | <input checked="" type="checkbox"/> <b>None</b><br><table border="1" style="width: 100%; border-collapse: collapse;"> <tr><td style="width: 50%; height: 15px;"></td><td style="width: 50%;"></td></tr> <tr><td style="height: 15px;"></td><td></td></tr> <tr><td style="height: 15px;"></td><td></td></tr> </table> |                                                                                     |  |  |  |  |  |  |
|                                          |                                                                                  |                                                                                                                                                                                                                                                                                                                      |                                                                                     |  |  |  |  |  |  |
|                                          |                                                                                  |                                                                                                                                                                                                                                                                                                                      |                                                                                     |  |  |  |  |  |  |
|                                          |                                                                                  |                                                                                                                                                                                                                                                                                                                      |                                                                                     |  |  |  |  |  |  |
| <b>13</b>                                | Other financial or non-financial interests                                       | <input type="checkbox"/> <b>None</b><br><table border="1" style="width: 100%; border-collapse: collapse;"> <tr><td style="width: 50%; height: 15px;">Steven Lemery is employed by the US FDA.</td><td style="width: 50%;"></td></tr> <tr><td style="height: 15px;"></td><td></td></tr> </table>                      | Steven Lemery is employed by the US FDA.                                            |  |  |  |  |  |  |
| Steven Lemery is employed by the US FDA. |                                                                                  |                                                                                                                                                                                                                                                                                                                      |                                                                                     |  |  |  |  |  |  |
|                                          |                                                                                  |                                                                                                                                                                                                                                                                                                                      |                                                                                     |  |  |  |  |  |  |

**Please place an "X" next to the following statement to indicate your agreement:**

I certify that I have answered every question and have not altered the wording of any of the questions on this form.

## ICMJE DISCLOSURE FORM

**Date:** 3/24/2023

**Your Name:** Xiaoxue Li

**Manuscript Title:** Association between antibiotic therapy and adverse oncological outcomes from targeted and immune-based therapy in hepatocellular carcinoma.

**Manuscript Number (if known):** JHEPR-D-23-00072-R1

In the interest of transparency, we ask you to disclose all relationships/activities/interests listed below that are related to the content of your manuscript. "Related" means any relation with for-profit or not-for-profit third parties whose interests may be affected by the content of the manuscript. Disclosure represents a commitment to transparency and does not necessarily indicate a bias. If you are in doubt about whether to list a relationship/activity/interest, it is preferable that you do so.

The author's relationships/activities/interests should be defined broadly. For example, if your manuscript pertains to the epidemiology of hypertension, you should declare all relationships with manufacturers of antihypertensive medication, even if that medication is not mentioned in the manuscript.

In item #1 below, report all support for the work reported in this manuscript without time limit. For all other items, the time frame for disclosure is the past 36 months.

|                                                    | Name all entities with whom you have this relationship or indicate none (add rows as needed)                                                                                   | Specifications/Comments (e.g., if payments were made to you or to your institution)                                                                                                                                                                                                                                       |  |  |
|----------------------------------------------------|--------------------------------------------------------------------------------------------------------------------------------------------------------------------------------|---------------------------------------------------------------------------------------------------------------------------------------------------------------------------------------------------------------------------------------------------------------------------------------------------------------------------|--|--|
| Time frame: Since the initial planning of the work |                                                                                                                                                                                |                                                                                                                                                                                                                                                                                                                           |  |  |
| <b>1</b>                                           | All support for the present manuscript (e.g., funding, provision of study materials, medical writing, article processing charges, etc.)<br><b>No time limit for this item.</b> | <input checked="" type="checkbox"/> <b>None</b><br><table border="1" style="width: 100%; height: 20px; margin-top: 5px;"> <tr><td style="width: 50%;"></td><td style="width: 50%;"></td></tr> </table> <div style="text-align: right; font-size: small; margin-top: 5px;">Click the tab key to add additional rows.</div> |  |  |
|                                                    |                                                                                                                                                                                |                                                                                                                                                                                                                                                                                                                           |  |  |
| Time frame: past 36 months                         |                                                                                                                                                                                |                                                                                                                                                                                                                                                                                                                           |  |  |
| <b>2</b>                                           | Grants or contracts from any entity (if not indicated in item #1 above).                                                                                                       | <input checked="" type="checkbox"/> <b>None</b><br><table border="1" style="width: 100%; height: 20px; margin-top: 5px;"> <tr><td style="width: 50%;"></td><td style="width: 50%;"></td></tr> </table>                                                                                                                    |  |  |
|                                                    |                                                                                                                                                                                |                                                                                                                                                                                                                                                                                                                           |  |  |
| <b>3</b>                                           | Royalties or licenses                                                                                                                                                          | <input checked="" type="checkbox"/> <b>None</b><br><table border="1" style="width: 100%; height: 20px; margin-top: 5px;"> <tr><td style="width: 50%;"></td><td style="width: 50%;"></td></tr> </table>                                                                                                                    |  |  |
|                                                    |                                                                                                                                                                                |                                                                                                                                                                                                                                                                                                                           |  |  |

|    |                                                                                                              | Name all entities with whom you have this relationship or indicate none (add rows as needed) | Specifications/Comments (e.g., if payments were made to you or to your institution)                                                         |  |  |  |  |  |  |  |  |
|----|--------------------------------------------------------------------------------------------------------------|----------------------------------------------------------------------------------------------|---------------------------------------------------------------------------------------------------------------------------------------------|--|--|--|--|--|--|--|--|
| 4  | Consulting fees                                                                                              | <input checked="" type="checkbox"/> None                                                     |                                                                                                                                             |  |  |  |  |  |  |  |  |
| 5  | Payment or honoraria for lectures, presentations, speakers bureaus, manuscript writing or educational events | <input checked="" type="checkbox"/> None                                                     | <table border="1"> <tr><td></td><td></td></tr> <tr><td></td><td></td></tr> <tr><td></td><td></td></tr> <tr><td></td><td></td></tr> </table> |  |  |  |  |  |  |  |  |
|    |                                                                                                              |                                                                                              |                                                                                                                                             |  |  |  |  |  |  |  |  |
|    |                                                                                                              |                                                                                              |                                                                                                                                             |  |  |  |  |  |  |  |  |
|    |                                                                                                              |                                                                                              |                                                                                                                                             |  |  |  |  |  |  |  |  |
|    |                                                                                                              |                                                                                              |                                                                                                                                             |  |  |  |  |  |  |  |  |
| 6  | Payment for expert testimony                                                                                 | <input checked="" type="checkbox"/> None                                                     | <table border="1"> <tr><td></td><td></td></tr> <tr><td></td><td></td></tr> <tr><td></td><td></td></tr> </table>                             |  |  |  |  |  |  |  |  |
|    |                                                                                                              |                                                                                              |                                                                                                                                             |  |  |  |  |  |  |  |  |
|    |                                                                                                              |                                                                                              |                                                                                                                                             |  |  |  |  |  |  |  |  |
|    |                                                                                                              |                                                                                              |                                                                                                                                             |  |  |  |  |  |  |  |  |
| 7  | Support for attending meetings and/or travel                                                                 | <input checked="" type="checkbox"/> None                                                     |                                                                                                                                             |  |  |  |  |  |  |  |  |
| 8  | Patents planned, issued or pending                                                                           | <input checked="" type="checkbox"/> None                                                     | <table border="1"> <tr><td></td><td></td></tr> <tr><td></td><td></td></tr> <tr><td></td><td></td></tr> </table>                             |  |  |  |  |  |  |  |  |
|    |                                                                                                              |                                                                                              |                                                                                                                                             |  |  |  |  |  |  |  |  |
|    |                                                                                                              |                                                                                              |                                                                                                                                             |  |  |  |  |  |  |  |  |
|    |                                                                                                              |                                                                                              |                                                                                                                                             |  |  |  |  |  |  |  |  |
| 9  | Participation on a Data Safety Monitoring Board or Advisory Board                                            | <input checked="" type="checkbox"/> None                                                     | <table border="1"> <tr><td></td><td></td></tr> <tr><td></td><td></td></tr> <tr><td></td><td></td></tr> </table>                             |  |  |  |  |  |  |  |  |
|    |                                                                                                              |                                                                                              |                                                                                                                                             |  |  |  |  |  |  |  |  |
|    |                                                                                                              |                                                                                              |                                                                                                                                             |  |  |  |  |  |  |  |  |
|    |                                                                                                              |                                                                                              |                                                                                                                                             |  |  |  |  |  |  |  |  |
| 10 | Leadership or fiduciary role in other board, society, committee or advocacy group, paid or unpaid            | <input checked="" type="checkbox"/> None                                                     | <table border="1"> <tr><td></td><td></td></tr> <tr><td></td><td></td></tr> <tr><td></td><td></td></tr> </table>                             |  |  |  |  |  |  |  |  |
|    |                                                                                                              |                                                                                              |                                                                                                                                             |  |  |  |  |  |  |  |  |
|    |                                                                                                              |                                                                                              |                                                                                                                                             |  |  |  |  |  |  |  |  |
|    |                                                                                                              |                                                                                              |                                                                                                                                             |  |  |  |  |  |  |  |  |

|                                       |                                                                                  | Name all entities with whom you have this relationship or indicate none (add rows as needed)                                                                                                                                                                                                                         | Specifications/Comments (e.g., if payments were made to you or to your institution) |  |  |  |  |  |  |
|---------------------------------------|----------------------------------------------------------------------------------|----------------------------------------------------------------------------------------------------------------------------------------------------------------------------------------------------------------------------------------------------------------------------------------------------------------------|-------------------------------------------------------------------------------------|--|--|--|--|--|--|
| <b>11</b>                             | Stock or stock options                                                           | <input checked="" type="checkbox"/> <b>None</b><br><table border="1" style="width: 100%; border-collapse: collapse;"> <tr><td style="width: 50%; height: 15px;"></td><td style="width: 50%;"></td></tr> <tr><td style="height: 15px;"></td><td></td></tr> <tr><td style="height: 15px;"></td><td></td></tr> </table> |                                                                                     |  |  |  |  |  |  |
|                                       |                                                                                  |                                                                                                                                                                                                                                                                                                                      |                                                                                     |  |  |  |  |  |  |
|                                       |                                                                                  |                                                                                                                                                                                                                                                                                                                      |                                                                                     |  |  |  |  |  |  |
|                                       |                                                                                  |                                                                                                                                                                                                                                                                                                                      |                                                                                     |  |  |  |  |  |  |
| <b>12</b>                             | Receipt of equipment, materials, drugs, medical writing, gifts or other services | <input checked="" type="checkbox"/> <b>None</b><br><table border="1" style="width: 100%; border-collapse: collapse;"> <tr><td style="width: 50%; height: 15px;"></td><td style="width: 50%;"></td></tr> <tr><td style="height: 15px;"></td><td></td></tr> <tr><td style="height: 15px;"></td><td></td></tr> </table> |                                                                                     |  |  |  |  |  |  |
|                                       |                                                                                  |                                                                                                                                                                                                                                                                                                                      |                                                                                     |  |  |  |  |  |  |
|                                       |                                                                                  |                                                                                                                                                                                                                                                                                                                      |                                                                                     |  |  |  |  |  |  |
|                                       |                                                                                  |                                                                                                                                                                                                                                                                                                                      |                                                                                     |  |  |  |  |  |  |
| <b>13</b>                             | Other financial or non-financial interests                                       | <input type="checkbox"/> <b>None</b><br><table border="1" style="width: 100%; border-collapse: collapse;"> <tr><td style="width: 50%; height: 15px;">Xiaoxue Li is employed by the US FDA.</td><td style="width: 50%;"></td></tr> <tr><td style="height: 15px;"></td><td></td></tr> </table>                         | Xiaoxue Li is employed by the US FDA.                                               |  |  |  |  |  |  |
| Xiaoxue Li is employed by the US FDA. |                                                                                  |                                                                                                                                                                                                                                                                                                                      |                                                                                     |  |  |  |  |  |  |
|                                       |                                                                                  |                                                                                                                                                                                                                                                                                                                      |                                                                                     |  |  |  |  |  |  |

**Please place an "X" next to the following statement to indicate your agreement:**

I certify that I have answered every question and have not altered the wording of any of the questions on this form.

## ICMJE DISCLOSURE FORM

**Date:** 3/24/2023

**Your Name:** Matthias Pinter

**Manuscript Title:** Association between antibiotic therapy and adverse oncological outcomes from targeted and immune-based therapy in hepatocellular carcinoma.

**Manuscript Number (if known):** JHEPR-D-23-00072-R1

In the interest of transparency, we ask you to disclose all relationships/activities/interests listed below that are related to the content of your manuscript. "Related" means any relation with for-profit or not-for-profit third parties whose interests may be affected by the content of the manuscript. Disclosure represents a commitment to transparency and does not necessarily indicate a bias. If you are in doubt about whether to list a relationship/activity/interest, it is preferable that you do so.

The author's relationships/activities/interests should be defined broadly. For example, if your manuscript pertains to the epidemiology of hypertension, you should declare all relationships with manufacturers of antihypertensive medication, even if that medication is not mentioned in the manuscript.

In item #1 below, report all support for the work reported in this manuscript without time limit. For all other items, the time frame for disclosure is the past 36 months.

|                                                    | Name all entities with whom you have this relationship or indicate none (add rows as needed)                                                                                   | Specifications/Comments (e.g., if payments were made to you or to your institution)                                                                                                                                                                                                                                                                                                                                                                                                                                                                                                                                                                                                                                                                                                                                                                                                                                                                                    |       |  |     |  |       |  |       |  |       |  |       |  |  |  |  |  |  |  |  |  |  |  |  |  |  |  |  |  |  |  |
|----------------------------------------------------|--------------------------------------------------------------------------------------------------------------------------------------------------------------------------------|------------------------------------------------------------------------------------------------------------------------------------------------------------------------------------------------------------------------------------------------------------------------------------------------------------------------------------------------------------------------------------------------------------------------------------------------------------------------------------------------------------------------------------------------------------------------------------------------------------------------------------------------------------------------------------------------------------------------------------------------------------------------------------------------------------------------------------------------------------------------------------------------------------------------------------------------------------------------|-------|--|-----|--|-------|--|-------|--|-------|--|-------|--|--|--|--|--|--|--|--|--|--|--|--|--|--|--|--|--|--|--|
| Time frame: Since the initial planning of the work |                                                                                                                                                                                |                                                                                                                                                                                                                                                                                                                                                                                                                                                                                                                                                                                                                                                                                                                                                                                                                                                                                                                                                                        |       |  |     |  |       |  |       |  |       |  |       |  |  |  |  |  |  |  |  |  |  |  |  |  |  |  |  |  |  |  |
| <b>1</b>                                           | All support for the present manuscript (e.g., funding, provision of study materials, medical writing, article processing charges, etc.)<br><b>No time limit for this item.</b> | <input checked="" type="checkbox"/> <b>None</b><br><table border="1" style="width: 100%; border-collapse: collapse; margin-top: 5px;"> <tr><td style="height: 20px;"> </td><td> </td></tr> <tr><td style="height: 20px;"> </td><td> </td></tr> <tr><td style="height: 20px;"> </td><td> </td></tr> </table> <p style="font-size: small; color: gray; margin-top: 5px;">Click the tab key to add additional rows.</p>                                                                                                                                                                                                                                                                                                                                                                                                                                                                                                                                                   |       |  |     |  |       |  |       |  |       |  |       |  |  |  |  |  |  |  |  |  |  |  |  |  |  |  |  |  |  |  |
|                                                    |                                                                                                                                                                                |                                                                                                                                                                                                                                                                                                                                                                                                                                                                                                                                                                                                                                                                                                                                                                                                                                                                                                                                                                        |       |  |     |  |       |  |       |  |       |  |       |  |  |  |  |  |  |  |  |  |  |  |  |  |  |  |  |  |  |  |
|                                                    |                                                                                                                                                                                |                                                                                                                                                                                                                                                                                                                                                                                                                                                                                                                                                                                                                                                                                                                                                                                                                                                                                                                                                                        |       |  |     |  |       |  |       |  |       |  |       |  |  |  |  |  |  |  |  |  |  |  |  |  |  |  |  |  |  |  |
|                                                    |                                                                                                                                                                                |                                                                                                                                                                                                                                                                                                                                                                                                                                                                                                                                                                                                                                                                                                                                                                                                                                                                                                                                                                        |       |  |     |  |       |  |       |  |       |  |       |  |  |  |  |  |  |  |  |  |  |  |  |  |  |  |  |  |  |  |
| Time frame: past 36 months                         |                                                                                                                                                                                |                                                                                                                                                                                                                                                                                                                                                                                                                                                                                                                                                                                                                                                                                                                                                                                                                                                                                                                                                                        |       |  |     |  |       |  |       |  |       |  |       |  |  |  |  |  |  |  |  |  |  |  |  |  |  |  |  |  |  |  |
| <b>2</b>                                           | Grants or contracts from any entity (if not indicated in item #1 above).                                                                                                       | <input type="checkbox"/> <b>None</b><br><table border="1" style="width: 100%; border-collapse: collapse; margin-top: 5px;"> <tr><td style="height: 20px;">Bayer</td><td> </td></tr> <tr><td style="height: 20px;">BMS</td><td> </td></tr> <tr><td style="height: 20px;">Eisai</td><td> </td></tr> <tr><td style="height: 20px;">Ipsen</td><td> </td></tr> <tr><td style="height: 20px;">Lilly</td><td> </td></tr> <tr><td style="height: 20px;">Roche</td><td> </td></tr> <tr><td style="height: 20px;"> </td><td> </td></tr> </table> | Bayer |  | BMS |  | Eisai |  | Ipsen |  | Lilly |  | Roche |  |  |  |  |  |  |  |  |  |  |  |  |  |  |  |  |  |  |  |
| Bayer                                              |                                                                                                                                                                                |                                                                                                                                                                                                                                                                                                                                                                                                                                                                                                                                                                                                                                                                                                                                                                                                                                                                                                                                                                        |       |  |     |  |       |  |       |  |       |  |       |  |  |  |  |  |  |  |  |  |  |  |  |  |  |  |  |  |  |  |
| BMS                                                |                                                                                                                                                                                |                                                                                                                                                                                                                                                                                                                                                                                                                                                                                                                                                                                                                                                                                                                                                                                                                                                                                                                                                                        |       |  |     |  |       |  |       |  |       |  |       |  |  |  |  |  |  |  |  |  |  |  |  |  |  |  |  |  |  |  |
| Eisai                                              |                                                                                                                                                                                |                                                                                                                                                                                                                                                                                                                                                                                                                                                                                                                                                                                                                                                                                                                                                                                                                                                                                                                                                                        |       |  |     |  |       |  |       |  |       |  |       |  |  |  |  |  |  |  |  |  |  |  |  |  |  |  |  |  |  |  |
| Ipsen                                              |                                                                                                                                                                                |                                                                                                                                                                                                                                                                                                                                                                                                                                                                                                                                                                                                                                                                                                                                                                                                                                                                                                                                                                        |       |  |     |  |       |  |       |  |       |  |       |  |  |  |  |  |  |  |  |  |  |  |  |  |  |  |  |  |  |  |
| Lilly                                              |                                                                                                                                                                                |                                                                                                                                                                                                                                                                                                                                                                                                                                                                                                                                                                                                                                                                                                                                                                                                                                                                                                                                                                        |       |  |     |  |       |  |       |  |       |  |       |  |  |  |  |  |  |  |  |  |  |  |  |  |  |  |  |  |  |  |
| Roche                                              |                                                                                                                                                                                |                                                                                                                                                                                                                                                                                                                                                                                                                                                                                                                                                                                                                                                                                                                                                                                                                                                                                                                                                                        |       |  |     |  |       |  |       |  |       |  |       |  |  |  |  |  |  |  |  |  |  |  |  |  |  |  |  |  |  |  |
|                                                    |                                                                                                                                                                                |                                                                                                                                                                                                                                                                                                                                                                                                                                                                                                                                                                                                                                                                                                                                                                                                                                                                                                                                                                        |       |  |     |  |       |  |       |  |       |  |       |  |  |  |  |  |  |  |  |  |  |  |  |  |  |  |  |  |  |  |
|                                                    |                                                                                                                                                                                |                                                                                                                                                                                                                                                                                                                                                                                                                                                                                                                                                                                                                                                                                                                                                                                                                                                                                                                                                                        |       |  |     |  |       |  |       |  |       |  |       |  |  |  |  |  |  |  |  |  |  |  |  |  |  |  |  |  |  |  |
|                                                    |                                                                                                                                                                                |                                                                                                                                                                                                                                                                                                                                                                                                                                                                                                                                                                                                                                                                                                                                                                                                                                                                                                                                                                        |       |  |     |  |       |  |       |  |       |  |       |  |  |  |  |  |  |  |  |  |  |  |  |  |  |  |  |  |  |  |
|                                                    |                                                                                                                                                                                |                                                                                                                                                                                                                                                                                                                                                                                                                                                                                                                                                                                                                                                                                                                                                                                                                                                                                                                                                                        |       |  |     |  |       |  |       |  |       |  |       |  |  |  |  |  |  |  |  |  |  |  |  |  |  |  |  |  |  |  |
|                                                    |                                                                                                                                                                                |                                                                                                                                                                                                                                                                                                                                                                                                                                                                                                                                                                                                                                                                                                                                                                                                                                                                                                                                                                        |       |  |     |  |       |  |       |  |       |  |       |  |  |  |  |  |  |  |  |  |  |  |  |  |  |  |  |  |  |  |
|                                                    |                                                                                                                                                                                |                                                                                                                                                                                                                                                                                                                                                                                                                                                                                                                                                                                                                                                                                                                                                                                                                                                                                                                                                                        |       |  |     |  |       |  |       |  |       |  |       |  |  |  |  |  |  |  |  |  |  |  |  |  |  |  |  |  |  |  |
|                                                    |                                                                                                                                                                                |                                                                                                                                                                                                                                                                                                                                                                                                                                                                                                                                                                                                                                                                                                                                                                                                                                                                                                                                                                        |       |  |     |  |       |  |       |  |       |  |       |  |  |  |  |  |  |  |  |  |  |  |  |  |  |  |  |  |  |  |
|                                                    |                                                                                                                                                                                |                                                                                                                                                                                                                                                                                                                                                                                                                                                                                                                                                                                                                                                                                                                                                                                                                                                                                                                                                                        |       |  |     |  |       |  |       |  |       |  |       |  |  |  |  |  |  |  |  |  |  |  |  |  |  |  |  |  |  |  |
|                                                    |                                                                                                                                                                                |                                                                                                                                                                                                                                                                                                                                                                                                                                                                                                                                                                                                                                                                                                                                                                                                                                                                                                                                                                        |       |  |     |  |       |  |       |  |       |  |       |  |  |  |  |  |  |  |  |  |  |  |  |  |  |  |  |  |  |  |

|          |                                                                                                              | Name all entities with whom you have this relationship or indicate none (add rows as needed) | Specifications/Comments (e.g., if payments were made to you or to your institution) |
|----------|--------------------------------------------------------------------------------------------------------------|----------------------------------------------------------------------------------------------|-------------------------------------------------------------------------------------|
|          |                                                                                                              |                                                                                              |                                                                                     |
| <b>3</b> | Royalties or licenses                                                                                        | <input checked="" type="checkbox"/> <b>None</b>                                              |                                                                                     |
|          |                                                                                                              |                                                                                              |                                                                                     |
|          |                                                                                                              |                                                                                              |                                                                                     |
| <b>4</b> | Consulting fees                                                                                              | <input type="checkbox"/> <b>None</b>                                                         |                                                                                     |
|          |                                                                                                              | Bayer                                                                                        |                                                                                     |
|          |                                                                                                              | BMS                                                                                          |                                                                                     |
|          |                                                                                                              | Eisai                                                                                        |                                                                                     |
|          |                                                                                                              | Ipsen                                                                                        |                                                                                     |
|          |                                                                                                              | Lilly                                                                                        |                                                                                     |
|          |                                                                                                              | MSD                                                                                          |                                                                                     |
|          |                                                                                                              | Roche                                                                                        |                                                                                     |
|          |                                                                                                              |                                                                                              |                                                                                     |
|          |                                                                                                              |                                                                                              |                                                                                     |
| <b>5</b> | Payment or honoraria for lectures, presentations, speakers bureaus, manuscript writing or educational events | <input type="checkbox"/> <b>None</b>                                                         |                                                                                     |
|          |                                                                                                              | Bayer                                                                                        |                                                                                     |
|          |                                                                                                              | BMS                                                                                          |                                                                                     |
|          |                                                                                                              | Eisai                                                                                        |                                                                                     |
|          |                                                                                                              | Lilly                                                                                        |                                                                                     |
|          |                                                                                                              | MSD                                                                                          |                                                                                     |
|          |                                                                                                              | Roche                                                                                        |                                                                                     |
|          |                                                                                                              |                                                                                              |                                                                                     |
|          |                                                                                                              |                                                                                              |                                                                                     |
|          |                                                                                                              |                                                                                              |                                                                                     |
|          |                                                                                                              |                                                                                              |                                                                                     |
| <b>6</b> | Payment for expert testimony                                                                                 | <input checked="" type="checkbox"/> <b>None</b>                                              |                                                                                     |
|          |                                                                                                              |                                                                                              |                                                                                     |
|          |                                                                                                              |                                                                                              |                                                                                     |
| <b>7</b> | Support for attending meetings and/or travel                                                                 | <input type="checkbox"/> <b>None</b>                                                         |                                                                                     |
|          |                                                                                                              | Bayer                                                                                        |                                                                                     |
|          |                                                                                                              | BMS                                                                                          |                                                                                     |
|          |                                                                                                              | Roche                                                                                        |                                                                                     |
|          |                                                                                                              |                                                                                              |                                                                                     |

|                                                                                                                                                                                                                                                               |                                                                                                   | Name all entities with whom you have this relationship or indicate none (add rows as needed) | Specifications/Comments (e.g., if payments were made to you or to your institution) |
|---------------------------------------------------------------------------------------------------------------------------------------------------------------------------------------------------------------------------------------------------------------|---------------------------------------------------------------------------------------------------|----------------------------------------------------------------------------------------------|-------------------------------------------------------------------------------------|
|                                                                                                                                                                                                                                                               |                                                                                                   |                                                                                              |                                                                                     |
| <b>8</b>                                                                                                                                                                                                                                                      | Patents planned, issued or pending                                                                | <input checked="" type="checkbox"/> <b>None</b>                                              |                                                                                     |
|                                                                                                                                                                                                                                                               |                                                                                                   |                                                                                              |                                                                                     |
| <b>9</b>                                                                                                                                                                                                                                                      | Participation on a Data Safety Monitoring Board or Advisory Board                                 | <input checked="" type="checkbox"/> <b>None</b>                                              |                                                                                     |
|                                                                                                                                                                                                                                                               |                                                                                                   |                                                                                              |                                                                                     |
| <b>10</b>                                                                                                                                                                                                                                                     | Leadership or fiduciary role in other board, society, committee or advocacy group, paid or unpaid | <input checked="" type="checkbox"/> <b>None</b>                                              |                                                                                     |
|                                                                                                                                                                                                                                                               |                                                                                                   |                                                                                              |                                                                                     |
| <b>11</b>                                                                                                                                                                                                                                                     | Stock or stock options                                                                            | <input checked="" type="checkbox"/> <b>None</b>                                              |                                                                                     |
|                                                                                                                                                                                                                                                               |                                                                                                   |                                                                                              |                                                                                     |
| <b>12</b>                                                                                                                                                                                                                                                     | Receipt of equipment, materials, drugs, medical writing, gifts or other services                  | <input checked="" type="checkbox"/> <b>None</b>                                              |                                                                                     |
|                                                                                                                                                                                                                                                               |                                                                                                   |                                                                                              |                                                                                     |
| <b>13</b>                                                                                                                                                                                                                                                     | Other financial or non-financial interests                                                        | <input checked="" type="checkbox"/> <b>None</b>                                              |                                                                                     |
|                                                                                                                                                                                                                                                               |                                                                                                   |                                                                                              |                                                                                     |
| <p><b>Please place an "X" next to the following statement to indicate your agreement:</b></p> <p><input checked="" type="checkbox"/> I certify that I have answered every question and have not altered the wording of any of the questions on this form.</p> |                                                                                                   |                                                                                              |                                                                                     |



## ICMJE DISCLOSURE FORM

**Date:** 9/19/2022

**Your Name:** Bernhard Scheiner

**Manuscript Title:** Association between antibiotic therapy and adverse oncological outcomes from targeted and immune-based therapy in hepatocellular carcinoma.

**Manuscript Number (if known):** JHEPR-D-23-00072-R1

In the interest of transparency, we ask you to disclose all relationships/activities/interests listed below that are related to the content of your manuscript. "Related" means any relation with for-profit or not-for-profit third parties whose interests may be affected by the content of the manuscript. Disclosure represents a commitment to transparency and does not necessarily indicate a bias. If you are in doubt about whether to list a relationship/activity/interest, it is preferable that you do so.

The author's relationships/activities/interests should be defined broadly. For example, if your manuscript pertains to the epidemiology of hypertension, you should declare all relationships with manufacturers of antihypertensive medication, even if that medication is not mentioned in the manuscript.

In item #1 below, report all support for the work reported in this manuscript without time limit. For all other items, the time frame for disclosure is the past 36 months.

|                                                           |                                                                                                                                                                                | Name all entities with whom you have this relationship or indicate none (add rows as needed)                                                                                                                                               | Specifications/Comments (e.g., if payments were made to you or to your institution) |  |  |  |  |  |                                                                                                                                                                                                                                                                                                  |  |  |  |  |  |  |
|-----------------------------------------------------------|--------------------------------------------------------------------------------------------------------------------------------------------------------------------------------|--------------------------------------------------------------------------------------------------------------------------------------------------------------------------------------------------------------------------------------------|-------------------------------------------------------------------------------------|--|--|--|--|--|--------------------------------------------------------------------------------------------------------------------------------------------------------------------------------------------------------------------------------------------------------------------------------------------------|--|--|--|--|--|--|
| <b>Time frame: Since the initial planning of the work</b> |                                                                                                                                                                                |                                                                                                                                                                                                                                            |                                                                                     |  |  |  |  |  |                                                                                                                                                                                                                                                                                                  |  |  |  |  |  |  |
| <b>1</b>                                                  | All support for the present manuscript (e.g., funding, provision of study materials, medical writing, article processing charges, etc.)<br><b>No time limit for this item.</b> | <input checked="" type="checkbox"/> <b>None</b><br><table border="1" style="width: 100%; height: 40px; margin-top: 5px;"> <tr><td style="width: 60%;"></td><td></td></tr> <tr><td></td><td></td></tr> <tr><td></td><td></td></tr> </table> |                                                                                     |  |  |  |  |  | <table border="1" style="width: 100%; height: 40px; margin-top: 5px;"> <tr><td style="width: 60%;"></td><td></td></tr> <tr><td></td><td></td></tr> <tr><td></td><td></td></tr> </table> <p style="font-size: small; color: gray; margin-top: 5px;">Click the tab key to add additional rows.</p> |  |  |  |  |  |  |
|                                                           |                                                                                                                                                                                |                                                                                                                                                                                                                                            |                                                                                     |  |  |  |  |  |                                                                                                                                                                                                                                                                                                  |  |  |  |  |  |  |
|                                                           |                                                                                                                                                                                |                                                                                                                                                                                                                                            |                                                                                     |  |  |  |  |  |                                                                                                                                                                                                                                                                                                  |  |  |  |  |  |  |
|                                                           |                                                                                                                                                                                |                                                                                                                                                                                                                                            |                                                                                     |  |  |  |  |  |                                                                                                                                                                                                                                                                                                  |  |  |  |  |  |  |
|                                                           |                                                                                                                                                                                |                                                                                                                                                                                                                                            |                                                                                     |  |  |  |  |  |                                                                                                                                                                                                                                                                                                  |  |  |  |  |  |  |
|                                                           |                                                                                                                                                                                |                                                                                                                                                                                                                                            |                                                                                     |  |  |  |  |  |                                                                                                                                                                                                                                                                                                  |  |  |  |  |  |  |
|                                                           |                                                                                                                                                                                |                                                                                                                                                                                                                                            |                                                                                     |  |  |  |  |  |                                                                                                                                                                                                                                                                                                  |  |  |  |  |  |  |
| <b>Time frame: past 36 months</b>                         |                                                                                                                                                                                |                                                                                                                                                                                                                                            |                                                                                     |  |  |  |  |  |                                                                                                                                                                                                                                                                                                  |  |  |  |  |  |  |
| <b>2</b>                                                  | Grants or contracts from any entity (if not indicated in item #1 above).                                                                                                       | <input checked="" type="checkbox"/> <b>None</b><br><table border="1" style="width: 100%; height: 40px; margin-top: 5px;"> <tr><td style="width: 60%;"></td><td></td></tr> <tr><td></td><td></td></tr> <tr><td></td><td></td></tr> </table> |                                                                                     |  |  |  |  |  | <table border="1" style="width: 100%; height: 40px; margin-top: 5px;"> <tr><td style="width: 60%;"></td><td></td></tr> <tr><td></td><td></td></tr> <tr><td></td><td></td></tr> </table>                                                                                                          |  |  |  |  |  |  |
|                                                           |                                                                                                                                                                                |                                                                                                                                                                                                                                            |                                                                                     |  |  |  |  |  |                                                                                                                                                                                                                                                                                                  |  |  |  |  |  |  |
|                                                           |                                                                                                                                                                                |                                                                                                                                                                                                                                            |                                                                                     |  |  |  |  |  |                                                                                                                                                                                                                                                                                                  |  |  |  |  |  |  |
|                                                           |                                                                                                                                                                                |                                                                                                                                                                                                                                            |                                                                                     |  |  |  |  |  |                                                                                                                                                                                                                                                                                                  |  |  |  |  |  |  |
|                                                           |                                                                                                                                                                                |                                                                                                                                                                                                                                            |                                                                                     |  |  |  |  |  |                                                                                                                                                                                                                                                                                                  |  |  |  |  |  |  |
|                                                           |                                                                                                                                                                                |                                                                                                                                                                                                                                            |                                                                                     |  |  |  |  |  |                                                                                                                                                                                                                                                                                                  |  |  |  |  |  |  |
|                                                           |                                                                                                                                                                                |                                                                                                                                                                                                                                            |                                                                                     |  |  |  |  |  |                                                                                                                                                                                                                                                                                                  |  |  |  |  |  |  |
| <b>3</b>                                                  | Royalties or licenses                                                                                                                                                          | <input checked="" type="checkbox"/> <b>None</b><br><table border="1" style="width: 100%; height: 40px; margin-top: 5px;"> <tr><td style="width: 60%;"></td><td></td></tr> <tr><td></td><td></td></tr> <tr><td></td><td></td></tr> </table> |                                                                                     |  |  |  |  |  | <table border="1" style="width: 100%; height: 40px; margin-top: 5px;"> <tr><td style="width: 60%;"></td><td></td></tr> <tr><td></td><td></td></tr> <tr><td></td><td></td></tr> </table>                                                                                                          |  |  |  |  |  |  |
|                                                           |                                                                                                                                                                                |                                                                                                                                                                                                                                            |                                                                                     |  |  |  |  |  |                                                                                                                                                                                                                                                                                                  |  |  |  |  |  |  |
|                                                           |                                                                                                                                                                                |                                                                                                                                                                                                                                            |                                                                                     |  |  |  |  |  |                                                                                                                                                                                                                                                                                                  |  |  |  |  |  |  |
|                                                           |                                                                                                                                                                                |                                                                                                                                                                                                                                            |                                                                                     |  |  |  |  |  |                                                                                                                                                                                                                                                                                                  |  |  |  |  |  |  |
|                                                           |                                                                                                                                                                                |                                                                                                                                                                                                                                            |                                                                                     |  |  |  |  |  |                                                                                                                                                                                                                                                                                                  |  |  |  |  |  |  |
|                                                           |                                                                                                                                                                                |                                                                                                                                                                                                                                            |                                                                                     |  |  |  |  |  |                                                                                                                                                                                                                                                                                                  |  |  |  |  |  |  |
|                                                           |                                                                                                                                                                                |                                                                                                                                                                                                                                            |                                                                                     |  |  |  |  |  |                                                                                                                                                                                                                                                                                                  |  |  |  |  |  |  |

|        |                                                                                                              | Name all entities with whom you have this relationship or indicate none (add rows as needed)                                                                                                                                                                                                                                                                           | Specifications/Comments (e.g., if payments were made to you or to your institution) |  |        |  |        |  |  |  |  |
|--------|--------------------------------------------------------------------------------------------------------------|------------------------------------------------------------------------------------------------------------------------------------------------------------------------------------------------------------------------------------------------------------------------------------------------------------------------------------------------------------------------|-------------------------------------------------------------------------------------|--|--------|--|--------|--|--|--|--|
| 4      | Consulting fees                                                                                              | <input checked="" type="checkbox"/> <b>None</b><br><table border="1" style="width: 100%; border-collapse: collapse;"> <tr><td style="width: 50%; height: 15px;"></td><td style="width: 50%;"></td></tr> <tr><td style="height: 15px;"></td><td></td></tr> <tr><td style="height: 15px;"></td><td></td></tr> <tr><td style="height: 15px;"></td><td></td></tr> </table> |                                                                                     |  |        |  |        |  |  |  |  |
|        |                                                                                                              |                                                                                                                                                                                                                                                                                                                                                                        |                                                                                     |  |        |  |        |  |  |  |  |
|        |                                                                                                              |                                                                                                                                                                                                                                                                                                                                                                        |                                                                                     |  |        |  |        |  |  |  |  |
|        |                                                                                                              |                                                                                                                                                                                                                                                                                                                                                                        |                                                                                     |  |        |  |        |  |  |  |  |
|        |                                                                                                              |                                                                                                                                                                                                                                                                                                                                                                        |                                                                                     |  |        |  |        |  |  |  |  |
| 5      | Payment or honoraria for lectures, presentations, speakers bureaus, manuscript writing or educational events | <input checked="" type="checkbox"/> <b>None</b><br><table border="1" style="width: 100%; border-collapse: collapse;"> <tr><td style="width: 50%; height: 15px;"></td><td style="width: 50%;"></td></tr> <tr><td style="height: 15px;"></td><td></td></tr> <tr><td style="height: 15px;"></td><td></td></tr> </table>                                                   |                                                                                     |  |        |  |        |  |  |  |  |
|        |                                                                                                              |                                                                                                                                                                                                                                                                                                                                                                        |                                                                                     |  |        |  |        |  |  |  |  |
|        |                                                                                                              |                                                                                                                                                                                                                                                                                                                                                                        |                                                                                     |  |        |  |        |  |  |  |  |
|        |                                                                                                              |                                                                                                                                                                                                                                                                                                                                                                        |                                                                                     |  |        |  |        |  |  |  |  |
| 6      | Payment for expert testimony                                                                                 | <input checked="" type="checkbox"/> <b>None</b><br><table border="1" style="width: 100%; border-collapse: collapse;"> <tr><td style="width: 50%; height: 15px;"></td><td style="width: 50%;"></td></tr> <tr><td style="height: 15px;"></td><td></td></tr> <tr><td style="height: 15px;"></td><td></td></tr> </table>                                                   |                                                                                     |  |        |  |        |  |  |  |  |
|        |                                                                                                              |                                                                                                                                                                                                                                                                                                                                                                        |                                                                                     |  |        |  |        |  |  |  |  |
|        |                                                                                                              |                                                                                                                                                                                                                                                                                                                                                                        |                                                                                     |  |        |  |        |  |  |  |  |
|        |                                                                                                              |                                                                                                                                                                                                                                                                                                                                                                        |                                                                                     |  |        |  |        |  |  |  |  |
| 7      | Support for attending meetings and/or travel                                                                 | <input type="checkbox"/> <b>None</b><br><table border="1" style="width: 100%; border-collapse: collapse;"> <tr><td style="width: 50%; height: 15px;">Ipsen</td><td style="width: 50%;"></td></tr> <tr><td style="height: 15px;">Gilead</td><td></td></tr> <tr><td style="height: 15px;">AbbVie</td><td></td></tr> </table>                                             | Ipsen                                                                               |  | Gilead |  | AbbVie |  |  |  |  |
| Ipsen  |                                                                                                              |                                                                                                                                                                                                                                                                                                                                                                        |                                                                                     |  |        |  |        |  |  |  |  |
| Gilead |                                                                                                              |                                                                                                                                                                                                                                                                                                                                                                        |                                                                                     |  |        |  |        |  |  |  |  |
| AbbVie |                                                                                                              |                                                                                                                                                                                                                                                                                                                                                                        |                                                                                     |  |        |  |        |  |  |  |  |
| 8      | Patents planned, issued or pending                                                                           | <input checked="" type="checkbox"/> <b>None</b><br><table border="1" style="width: 100%; border-collapse: collapse;"> <tr><td style="width: 50%; height: 15px;"></td><td style="width: 50%;"></td></tr> <tr><td style="height: 15px;"></td><td></td></tr> <tr><td style="height: 15px;"></td><td></td></tr> </table>                                                   |                                                                                     |  |        |  |        |  |  |  |  |
|        |                                                                                                              |                                                                                                                                                                                                                                                                                                                                                                        |                                                                                     |  |        |  |        |  |  |  |  |
|        |                                                                                                              |                                                                                                                                                                                                                                                                                                                                                                        |                                                                                     |  |        |  |        |  |  |  |  |
|        |                                                                                                              |                                                                                                                                                                                                                                                                                                                                                                        |                                                                                     |  |        |  |        |  |  |  |  |
| 9      | Participation on a Data Safety Monitoring Board or Advisory Board                                            | <input checked="" type="checkbox"/> <b>None</b><br><table border="1" style="width: 100%; border-collapse: collapse;"> <tr><td style="width: 50%; height: 15px;"></td><td style="width: 50%;"></td></tr> <tr><td style="height: 15px;"></td><td></td></tr> <tr><td style="height: 15px;"></td><td></td></tr> </table>                                                   |                                                                                     |  |        |  |        |  |  |  |  |
|        |                                                                                                              |                                                                                                                                                                                                                                                                                                                                                                        |                                                                                     |  |        |  |        |  |  |  |  |
|        |                                                                                                              |                                                                                                                                                                                                                                                                                                                                                                        |                                                                                     |  |        |  |        |  |  |  |  |
|        |                                                                                                              |                                                                                                                                                                                                                                                                                                                                                                        |                                                                                     |  |        |  |        |  |  |  |  |
| 10     | Leadership or fiduciary role in other board, society, committee or advocacy group, paid or unpaid            | <input checked="" type="checkbox"/> <b>None</b><br><table border="1" style="width: 100%; border-collapse: collapse;"> <tr><td style="width: 50%; height: 15px;"></td><td style="width: 50%;"></td></tr> <tr><td style="height: 15px;"></td><td></td></tr> <tr><td style="height: 15px;"></td><td></td></tr> </table>                                                   |                                                                                     |  |        |  |        |  |  |  |  |
|        |                                                                                                              |                                                                                                                                                                                                                                                                                                                                                                        |                                                                                     |  |        |  |        |  |  |  |  |
|        |                                                                                                              |                                                                                                                                                                                                                                                                                                                                                                        |                                                                                     |  |        |  |        |  |  |  |  |
|        |                                                                                                              |                                                                                                                                                                                                                                                                                                                                                                        |                                                                                     |  |        |  |        |  |  |  |  |

|    |                                                                                  | Name all entities with whom you have this relationship or indicate none (add rows as needed) | Specifications/Comments (e.g., if payments were made to you or to your institution) |
|----|----------------------------------------------------------------------------------|----------------------------------------------------------------------------------------------|-------------------------------------------------------------------------------------|
| 11 | Stock or stock options                                                           | <input checked="" type="checkbox"/> None                                                     |                                                                                     |
|    |                                                                                  |                                                                                              |                                                                                     |
|    |                                                                                  |                                                                                              |                                                                                     |
|    |                                                                                  |                                                                                              |                                                                                     |
| 12 | Receipt of equipment, materials, drugs, medical writing, gifts or other services | <input checked="" type="checkbox"/> None                                                     |                                                                                     |
|    |                                                                                  |                                                                                              |                                                                                     |
|    |                                                                                  |                                                                                              |                                                                                     |
|    |                                                                                  |                                                                                              |                                                                                     |
| 13 | Other financial or non-financial interests                                       | <input checked="" type="checkbox"/> None                                                     |                                                                                     |
|    |                                                                                  |                                                                                              |                                                                                     |
|    |                                                                                  |                                                                                              |                                                                                     |
|    |                                                                                  |                                                                                              |                                                                                     |

Please place an "X" next to the following statement to indicate your agreement:

I certify that I have answered every question and have not altered the wording of any of the questions on this form.
